# Supplementary material for: Dibenzothieno and dibenzothieno[2,3- d ]thieno [ a ]-fused BODIPYs: synthesis, unique structure and photophysical properties
Source: Royal Society of Chemistry journal article supplement (doi:10.1039/d4qm00616j), 2024-01-01
Supplement: d4qm00616j1.pdf [file d4qm00616j1.pdf]

*Supporting information for*

**Dibenzothieno and dibenzothieno[2,3-*d*]thieno [*a*]-fused BODIPYs: synthesis, unique structure and photophysical properties**

Limin He,<sup>a</sup> Lu Li,<sup>a</sup> Muyao Zhao,<sup>a</sup> Yunxia Zhao,<sup>a</sup> Yanqing Li,<sup>a</sup> Xiangguang Li,<sup>a,\*</sup> Yanhua Yang,<sup>a,\*</sup> Shulin Gao,<sup>a</sup> Ping Lei,<sup>b</sup> Zhaohui Wang,<sup>c</sup> and Wei Jiang<sup>c,\*</sup>

<sup>a</sup> Yunnan Key Laboratory of Metal-Organic Molecular Materials and Device, School of Chemistry and Chemical Engineering, Kunming University, Kunming 650214, China.

<sup>b</sup> Technology Center, China Tobacco Yunnan Industrial Co., Ltd., Kunming 650231, China.

<sup>c</sup> Key Laboratory of Organic Optoelectronics and Molecular Engineering, Department of Chemistry, Tsinghua University, Beijing 100084, China.

\*Email: lixianguang@iccas.ac.cn; yh\_yangkmu@126.com; jiangwei2021@mail.tsinghua.edu.cn

**Contents:**

|                                                                                               |             |
|-----------------------------------------------------------------------------------------------|-------------|
| <b>1. Experimental Details .....</b>                                                          | <b>S1</b>   |
| <b>2. Crystal Data.....</b>                                                                   | <b>S3</b>   |
| <b>3. Synthesis and Characterization .....</b>                                                | <b>S15</b>  |
| <b>4. Photophysical Data .....</b>                                                            | <b>S30</b>  |
| <b>5. Electrochemical Data.....</b>                                                           | <b>S49</b>  |
| <b>6. DFT Calculations .....</b>                                                              | <b>S56</b>  |
| <b>7. Copies of <sup>1</sup>H, <sup>13</sup>C NMR, and High Resolution Mass Spectra .....</b> | <b>S74</b>  |
| <b>8. References .....</b>                                                                    | <b>S120</b> |

## 1. Experimental Details

**General information.** All chemicals were purchased from commercial suppliers and used without further purification unless otherwise specified. The solvent THF and toluene were distilled over sodium and benzophenone.

All reactions of air-sensitive compounds were carried out under dry argon by using Schlenk techniques. The reaction progress was monitored by thin layer chromatography (TLC) and spots were observed with a UV254 fluorescent indicator. Flash column chromatography was performed using silica gel (200-300 mesh).  $^1\text{H}$  NMR and  $^{13}\text{C}$  NMR spectra were recorded in deuterated solvents using a BRUKER ASCEND<sup>TM</sup>400 Spectrometer. NMR chemical shifts are reported in ppm using the residual protonated solvent as an internal standard. High resolution mass spectra (HRMS) were determined on a Thermo Scientific<sup>TM</sup> Orbitrap Exploris<sup>TM</sup> 120 Mass Spectrometer.

**Photophysical properties measurements.** Absorption spectra were measured with a Shimadzu UV3600Plus UV-VIS-NIR Spectrophotometer in a 1 cm quartz cell. Fluorescence measurements were measured with Edinburgh FS5 Spectrofluorometer at room temperature. In the fluorescence lifetime conducted using the Edinburgh FS5 Spectrofluorometer, a fluorescence decay curve was obtained by scanning the sample at its peak emission wavelength using a 450 nm TCSPC laser. The fluorescence lifetime was then determined by fitting the decay curve to a single-exponential function. For the absolute quantum yield test, the integrating sphere captures all emitted light from the sample in solution, including both diffuse and direct emission. The quantum yield is determined by comparing the peak area of the sample's emission spectrum to that of a reference solvent or standard.

**Electrochemical measurements.** Cyclic voltammetry (CV) was performed using a CHI620E electrochemical workstation at a scan rate of  $50\text{ mV s}^{-1}$ , using glassy carbon discs as the working electrodes, Pt wire as the counter electrode, Ag/AgCl electrode as the reference electrode. 0.1 M tetrabutylammonium hexafluorophosphate (*n*-Bu<sub>4</sub>NPF<sub>6</sub>) dissolved in CH<sub>2</sub>Cl<sub>2</sub> (HPLC grade) was employed as the supporting electrolyte. Ferrocene/ferrocenium was employed as an external reference, the energy

level of which is assumed to be -4.8 eV below the vacuum level.<sup>[1,2]</sup> The LUMO and HOMO levels were estimated from the onset potentials of the first reduction and oxidation waves in CV, respectively. The half-wave potential of oxidation peak of Fc was measured to be 0.48 V against Ag/AgCl.

**X-ray structure analysis.** Single crystals of **5a** suitable for X-ray analysis were obtained by slow diffusion of MeOH into their CHCl<sub>3</sub> solution. Single crystals of **5b** suitable for X-ray analysis was obtained by slow diffusion of hexane into their CH<sub>2</sub>Cl<sub>2</sub> solution. Single crystals of **5c** suitable for X-ray analysis were obtained by slow diffusion of hexane into their CH<sub>2</sub>Cl<sub>2</sub> solution. Single crystals of **8a** suitable for X-ray analysis were grown by slow diffusion of MeOH into their CH<sub>2</sub>Cl<sub>2</sub> solution. Single crystals of **4b** and **4c** suitable for X-ray analysis were obtained by slow of CHCl<sub>3</sub> solution. A suitable crystal was selected and performed on a Bruker D8 VENTURE diffractometer. The crystal was kept at 193.00 K during data collection. The determination of unit cell parameters and data collections of **5a**, **5b**, **5c**, **8a**, **4b** and **4c** were performed with Cu K $\alpha$  radiation ( $\lambda$ ) at 1.54178 Å, Cu K $\alpha$  radiation ( $\lambda$ ) at 1.54178 Å, Cu K $\alpha$  radiation ( $\lambda$ ) at 1.54178 Å, Mo K $\alpha$  radiation ( $\lambda$ ) at 0.71073 Å and Cu K $\alpha$  radiation ( $\lambda$ ) at 1.54178 Å, respectively. Using Olex2<sup>[3]</sup>, the structure was solved with the olex2.solve<sup>[4]</sup> structure solution program using Charge Flipping and refined with the SHELXL<sup>[5]</sup> refinement package using Least Squares minimisation. These data can be obtained free of charge from The Cambridge Crystallographic Data Centre via [www.ccdc.cam.ac.uk/data\\_request/cif](http://www.ccdc.cam.ac.uk/data_request/cif).

## 2. Crystal Data

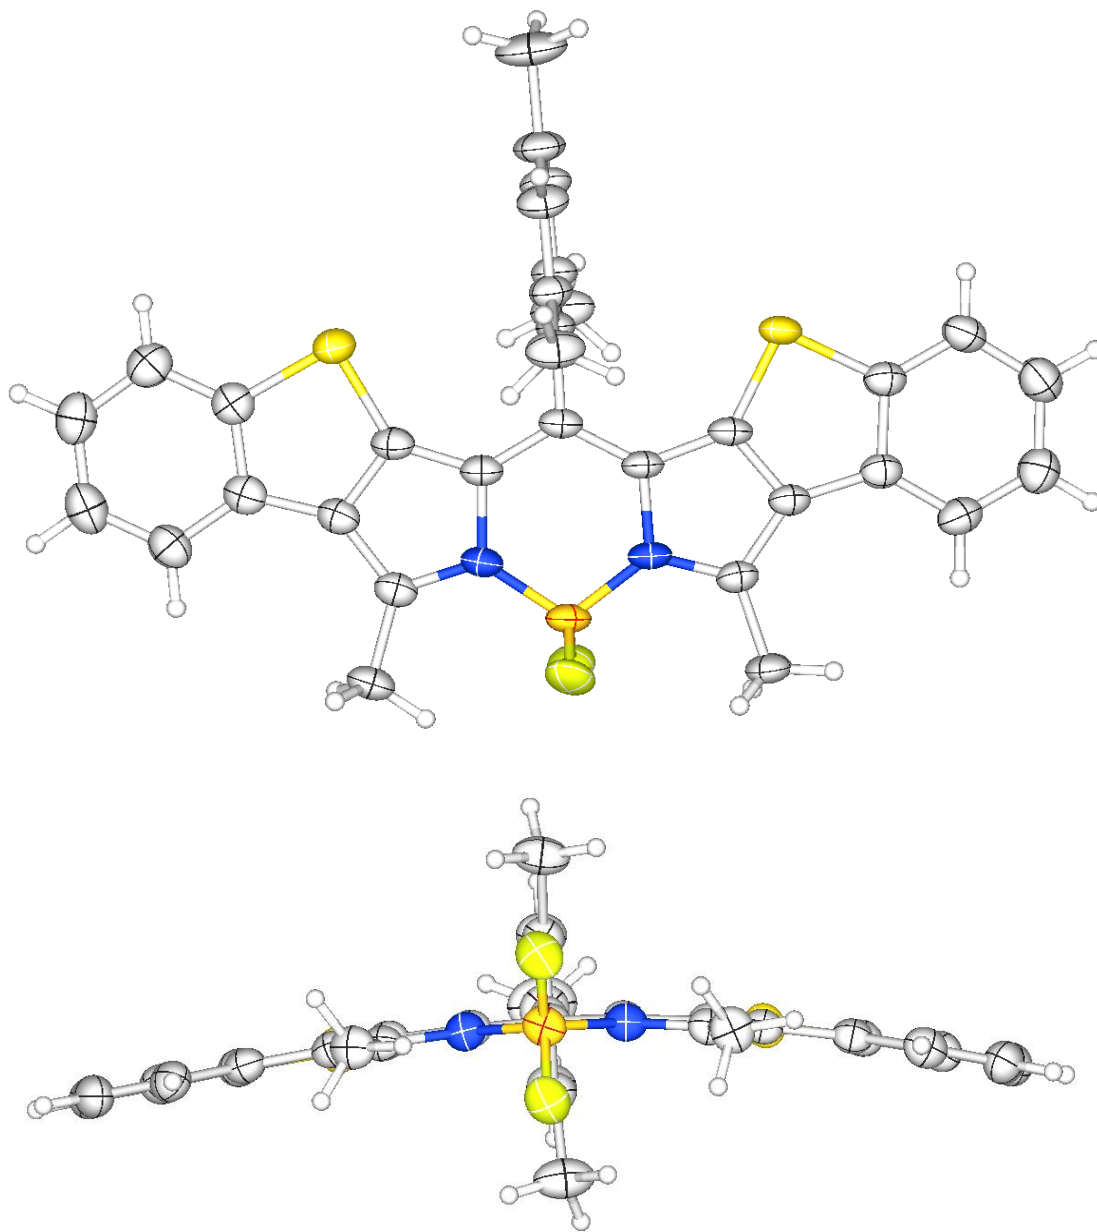

**Figure S1.** Single-crystal structure of **5a**, with thermal ellipsoids shown at 50% probability.

**Table S1** Crystal data and structure refinement for **5a**. CCDC number= 2366236

|                                             |                                                                               |
|---------------------------------------------|-------------------------------------------------------------------------------|
| Identification code                         | <b>5a</b>                                                                     |
| Empirical formula                           | C <sub>32</sub> H <sub>25</sub> BF <sub>2</sub> N <sub>2</sub> S <sub>2</sub> |
| Formula weight                              | 550.47                                                                        |
| Temperature/K                               | 193.00                                                                        |
| Crystal system                              | monoclinic                                                                    |
| Space group                                 | P2 <sub>1</sub> /c                                                            |
| a/Å                                         | 13.5779(3)                                                                    |
| b/Å                                         | 22.7898(6)                                                                    |
| c/Å                                         | 10.9233(3)                                                                    |
| α/°                                         | 90                                                                            |
| β/°                                         | 113.0340(10)                                                                  |
| γ/°                                         | 90                                                                            |
| Volume/Å <sup>3</sup>                       | 3110.59(14)                                                                   |
| Z                                           | 4                                                                             |
| ρ <sub>calc</sub> /cm <sup>3</sup>          | 1.175                                                                         |
| μ/mm <sup>-1</sup>                          | 1.828                                                                         |
| F(000)                                      | 1144.0                                                                        |
| Crystal size/mm <sup>3</sup>                | 0.13 × 0.11 × 0.1                                                             |
| Radiation                                   | Cu Kα (λ = 1.54178)                                                           |
| 2θ range for data collection/°              | 8.07 to 136.534                                                               |
| Index ranges                                | -15 ≤ h ≤ 16, -25 ≤ k ≤ 27, -12 ≤ l ≤ 13                                      |
| Reflections collected                       | 26246                                                                         |
| Independent reflections                     | 5658 [R <sub>int</sub> = 0.0441, R <sub>sigma</sub> = 0.0318]                 |
| Data/restraints/parameters                  | 5658/0/357                                                                    |
| Goodness-of-fit on F <sup>2</sup>           | 1.058                                                                         |
| Final R indexes [I >= 2σ (I)]               | R <sub>1</sub> = 0.0473, wR <sub>2</sub> = 0.1404                             |
| Final R indexes [all data]                  | R <sub>1</sub> = 0.0575, wR <sub>2</sub> = 0.1482                             |
| Largest diff. peak/hole / e Å <sup>-3</sup> | 0.55/-0.43                                                                    |

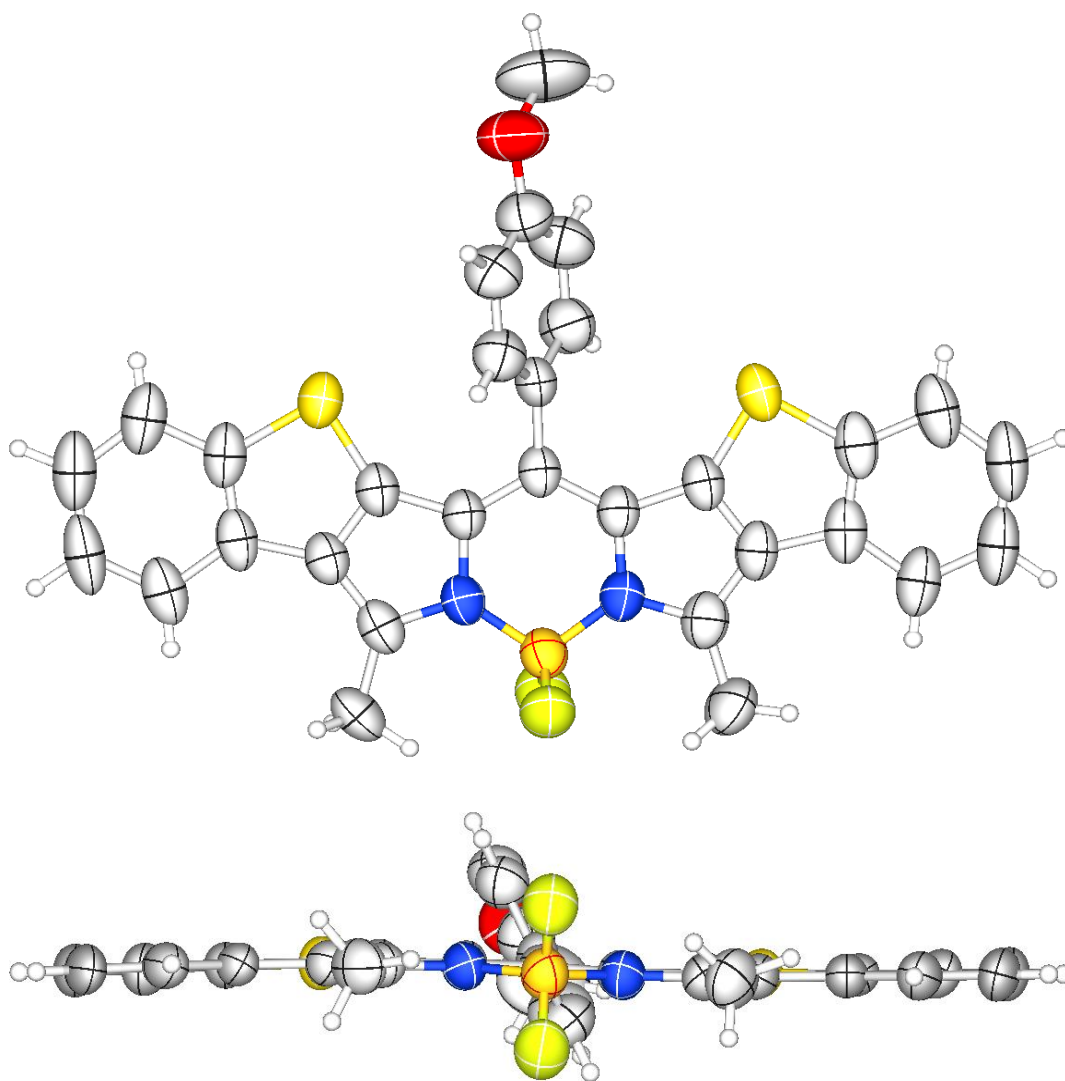

**Figure S2.** Single-crystal structure of **5b**, with thermal ellipsoids shown at 50% probability.

**Table S2** Crystal data and structure refinement for **5b**. CCDC number= 2366239

|                                             |                                                                                |
|---------------------------------------------|--------------------------------------------------------------------------------|
| Identification code                         | <b>5b</b>                                                                      |
| Empirical formula                           | C <sub>30</sub> H <sub>21</sub> BF <sub>2</sub> N <sub>2</sub> OS <sub>2</sub> |
| Formula weight                              | 538.42                                                                         |
| Temperature/K                               | 193.00                                                                         |
| Crystal system                              | orthorhombic                                                                   |
| Space group                                 | Fddd                                                                           |
| a/Å                                         | 13.9327(4)                                                                     |
| b/Å                                         | 36.6830(9)                                                                     |
| c/Å                                         | 49.9694(15)                                                                    |
| α/°                                         | 90                                                                             |
| β/°                                         | 90                                                                             |
| γ/°                                         | 90                                                                             |
| Volume/Å <sup>3</sup>                       | 25539.0(12)                                                                    |
| Z                                           | 32                                                                             |
| ρ <sub>calc</sub> /cm <sup>3</sup>          | 1.120                                                                          |
| μ/mm <sup>-1</sup>                          | 1.797                                                                          |
| F(000)                                      | 8896.0                                                                         |
| Crystal size/mm <sup>3</sup>                | 0.15 × 0.13 × 0.1                                                              |
| Radiation                                   | Cu Kα (λ = 1.54178)                                                            |
| 2θ range for data collection/°              | 7.014 to 137.298                                                               |
| Index ranges                                | -16 ≤ h ≤ 16, -44 ≤ k ≤ 34, -60 ≤ l ≤ 60                                       |
| Reflections collected                       | 34446                                                                          |
| Independent reflections                     | 5851 [R <sub>int</sub> = 0.0916, R <sub>sigma</sub> = 0.0869]                  |
| Data/restraints/parameters                  | 5851/0/334                                                                     |
| Goodness-of-fit on F <sup>2</sup>           | 1.003                                                                          |
| Final R indexes [I ≥ 2σ (I)]                | R <sub>1</sub> = 0.0732, wR <sub>2</sub> = 0.2095                              |
| Final R indexes [all data]                  | R <sub>1</sub> = 0.1010, wR <sub>2</sub> = 0.2392                              |
| Largest diff. peak/hole / e Å <sup>-3</sup> | 0.32/-0.42                                                                     |

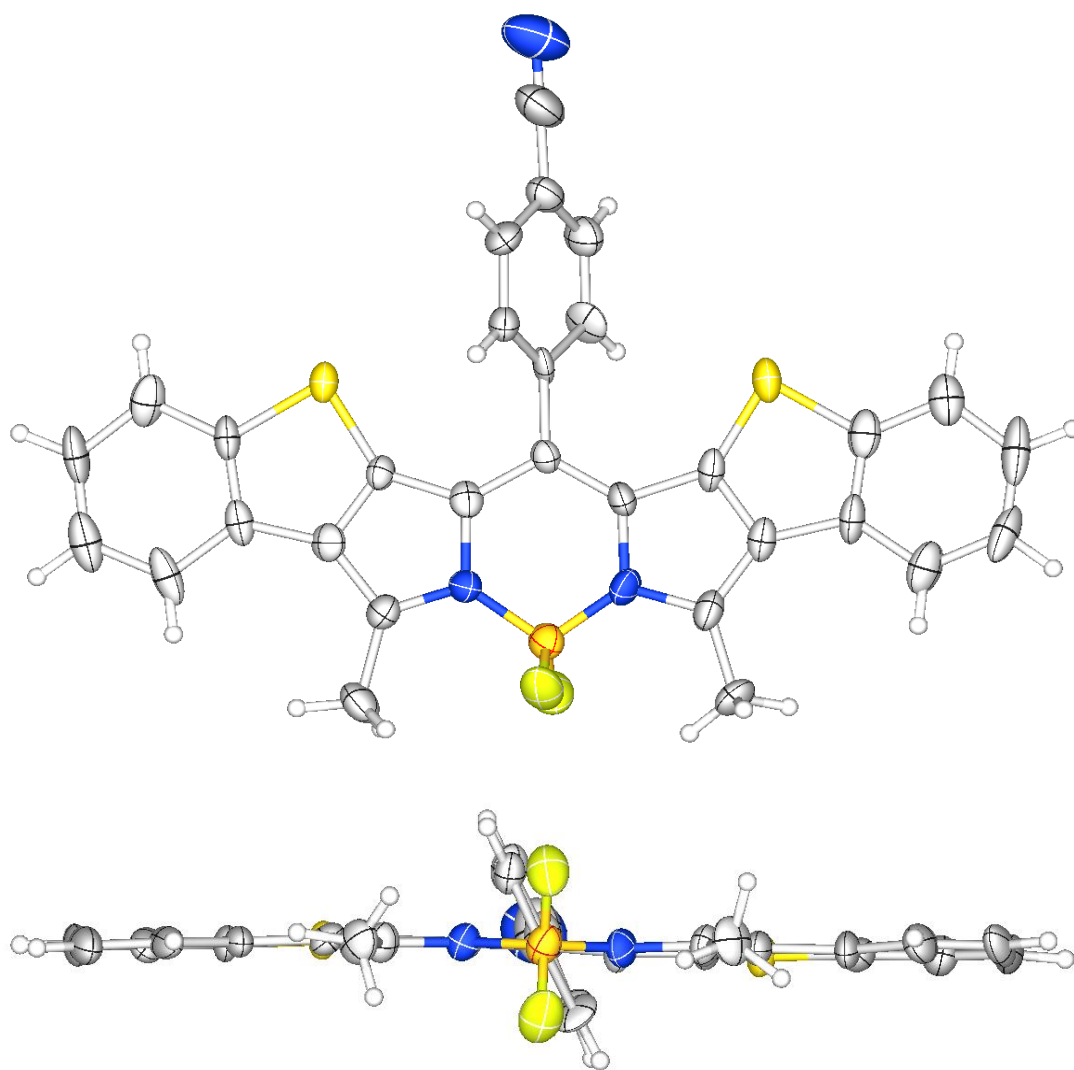

**Figure S3.** Single-crystal structure of **5c**, with thermal ellipsoids shown at 50% probability.



**Table S3** Crystal data and structure refinement for **5c**. CCDC number= 2366259

|                                             |                                                                               |
|---------------------------------------------|-------------------------------------------------------------------------------|
| Identification code                         | <b>5c</b>                                                                     |
| Empirical formula                           | C <sub>30</sub> H <sub>18</sub> BF <sub>2</sub> N <sub>3</sub> S <sub>2</sub> |
| Formula weight                              | 533.40                                                                        |
| Temperature/K                               | 193.00                                                                        |
| Crystal system                              | monoclinic                                                                    |
| Space group                                 | Pc                                                                            |
| a/Å                                         | 9.5209(5)                                                                     |
| b/Å                                         | 24.5517(14)                                                                   |
| c/Å                                         | 13.7611(8)                                                                    |
| α/°                                         | 90                                                                            |
| β/°                                         | 105.752(3)                                                                    |
| γ/°                                         | 90                                                                            |
| Volume/Å <sup>3</sup>                       | 3095.9(3)                                                                     |
| Z                                           | 4                                                                             |
| ρ <sub>calc</sub> /cm <sup>3</sup>          | 1.144                                                                         |
| μ/mm <sup>-1</sup>                          | 1.835                                                                         |
| F(000)                                      | 1096.0                                                                        |
| Crystal size/mm <sup>3</sup>                | 0.15 × 0.13 × 0.12                                                            |
| Radiation                                   | Cu Kα (λ = 1.54178)                                                           |
| 2θ range for data collection/°              | 3.598 to 137.054                                                              |
| Index ranges                                | -11 ≤ h ≤ 11, -29 ≤ k ≤ 25, -14 ≤ l ≤ 16                                      |
| Reflections collected                       | 21251                                                                         |
| Independent reflections                     | 10033 [R <sub>int</sub> = 0.0405, R <sub>sigma</sub> = 0.0559]                |
| Data/restraints/parameters                  | 10033/245/1035                                                                |
| Goodness-of-fit on F <sup>2</sup>           | 1.072                                                                         |
| Final R indexes [I ≥ 2σ (I)]                | R <sub>1</sub> = 0.0692, wR <sub>2</sub> = 0.1891                             |
| Final R indexes [all data]                  | R <sub>1</sub> = 0.0818, wR <sub>2</sub> = 0.2055                             |
| Largest diff. peak/hole / e Å <sup>-3</sup> | 0.35/-0.66                                                                    |
| Flack parameter                             | 0.498(12)                                                                     |

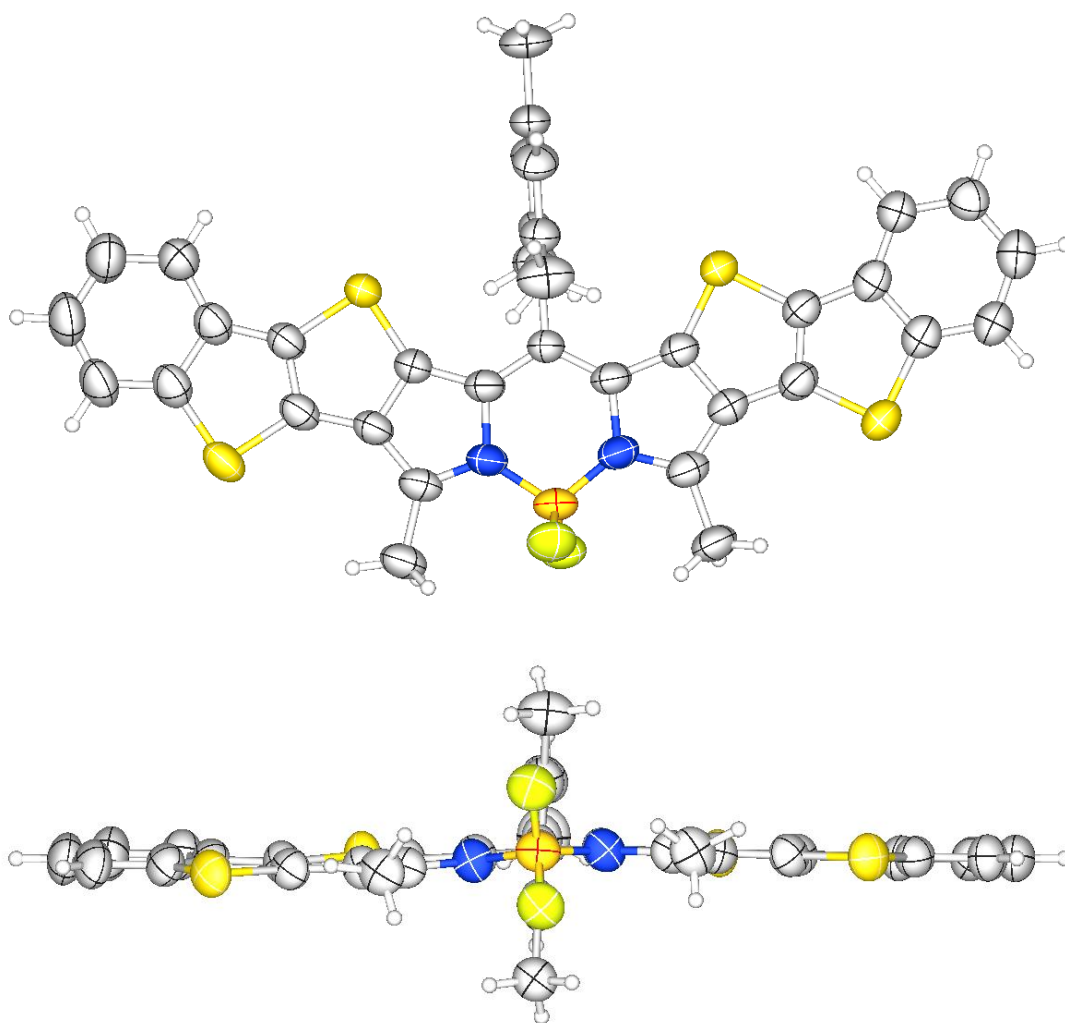

**Figure S4.** Single-crystal structure of **8a**, with thermal ellipsoids shown at 50% probability.

**Table S4** Crystal data and structure refinement for **8a**. CCDC number= 2366238

|                                             |                                                                               |
|---------------------------------------------|-------------------------------------------------------------------------------|
| Identification code                         | <b>8a</b>                                                                     |
| Empirical formula                           | C <sub>36</sub> H <sub>25</sub> BF <sub>2</sub> N <sub>2</sub> S <sub>4</sub> |
| Formula weight                              | 662.63                                                                        |
| Temperature/K                               | 223.00                                                                        |
| Crystal system                              | triclinic                                                                     |
| Space group                                 | P-1                                                                           |
| a/Å                                         | 8.484(6)                                                                      |
| b/Å                                         | 12.565(6)                                                                     |
| c/Å                                         | 16.196(7)                                                                     |
| α/°                                         | 76.79(3)                                                                      |
| β/°                                         | 83.25(3)                                                                      |
| γ/°                                         | 73.44(3)                                                                      |
| Volume/Å <sup>3</sup>                       | 1608.5(15)                                                                    |
| Z                                           | 2                                                                             |
| ρ <sub>calc</sub> /cm <sup>3</sup>          | 1.368                                                                         |
| μ/mm <sup>-1</sup>                          | 3.048                                                                         |
| F(000)                                      | 684.0                                                                         |
| Crystal size/mm <sup>3</sup>                | 0.14 × 0.13 × 0.11                                                            |
| Radiation                                   | Cu Kα (λ = 1.54178)                                                           |
| 2θ range for data collection/°              | 7.5 to 147.266                                                                |
| Index ranges                                | -10 ≤ h ≤ 10, -15 ≤ k ≤ 15, -20 ≤ l ≤ 19                                      |
| Reflections collected                       | 16200                                                                         |
| Independent reflections                     | 6338 [R <sub>int</sub> = 0.0716, R <sub>sigma</sub> = 0.0658]                 |
| Data/restraints/parameters                  | 6338/0/411                                                                    |
| Goodness-of-fit on F <sup>2</sup>           | 0.965                                                                         |
| Final R indexes [I >= 2σ (I)]               | R <sub>1</sub> = 0.0577, wR <sub>2</sub> = 0.1532                             |
| Final R indexes [all data]                  | R <sub>1</sub> = 0.0940, wR <sub>2</sub> = 0.1749                             |
| Largest diff. peak/hole / e Å <sup>-3</sup> | 0.56/-0.38                                                                    |

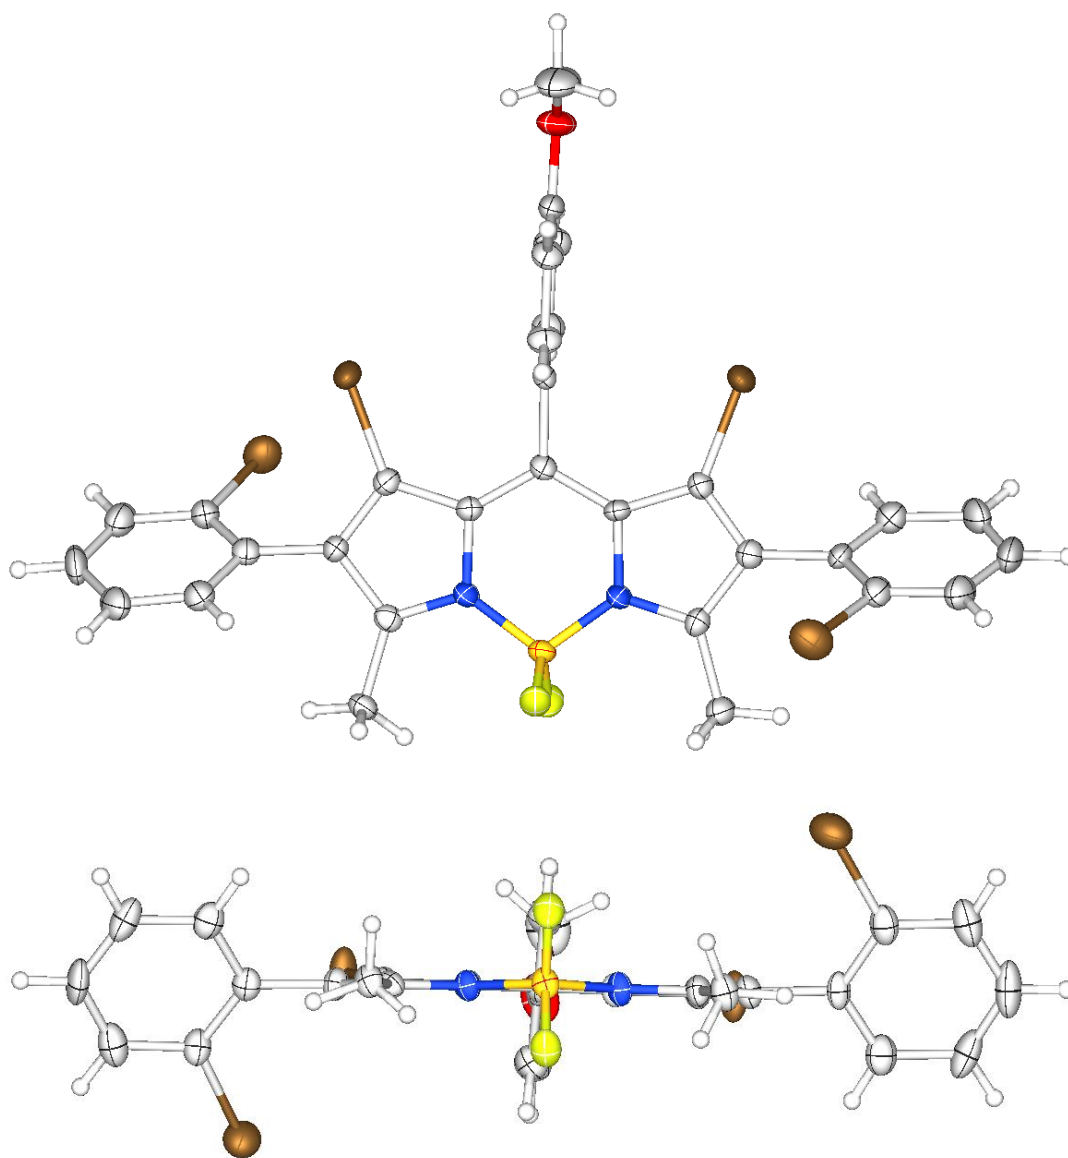

**Figure S5.** Single-crystal structure of **4b**, with thermal ellipsoids shown at 50% probability.

**Table S5** Crystal data and structure refinement for **4b**. CCDC number= 2366240

|                                             |                                                               |
|---------------------------------------------|---------------------------------------------------------------|
| Identification code                         | <b>4b</b>                                                     |
| Empirical formula                           | $C_{30}H_{21}BBr_4F_2N_2O$                                    |
| Formula weight                              | 793.94                                                        |
| Temperature/K                               | 193.00                                                        |
| Crystal system                              | orthorhombic                                                  |
| Space group                                 | Pca2 <sub>1</sub>                                             |
| a/Å                                         | 13.3963(6)                                                    |
| b/Å                                         | 20.6772(7)                                                    |
| c/Å                                         | 10.5068(5)                                                    |
| $\alpha$ /°                                 | 90                                                            |
| $\beta$ /°                                  | 90                                                            |
| $\gamma$ /°                                 | 90                                                            |
| Volume/Å <sup>3</sup>                       | 2910.4(2)                                                     |
| Z                                           | 4                                                             |
| $\rho_{calc}$ /cm <sup>3</sup>              | 1.812                                                         |
| $\mu$ /mm <sup>-1</sup>                     | 5.572                                                         |
| F(000)                                      | 1544.0                                                        |
| Crystal size/mm <sup>3</sup>                | 0.23 × 0.16 × 0.12                                            |
| Radiation                                   | Mo K $\alpha$ ( $\lambda$ = 0.71073)                          |
| 2 $\theta$ range for data collection/°      | 4.976 to 54.948                                               |
| Index ranges                                | -17 ≤ h ≤ 15, -23 ≤ k ≤ 26, -12 ≤ l ≤ 13                      |
| Reflections collected                       | 32466                                                         |
| Independent reflections                     | 6525 [R <sub>int</sub> = 0.0742, R <sub>sigma</sub> = 0.0555] |
| Data/restraints/parameters                  | 6525/1/364                                                    |
| Goodness-of-fit on F <sup>2</sup>           | 0.983                                                         |
| Final R indexes [I ≥ 2 $\sigma$ (I)]        | R <sub>1</sub> = 0.0354, wR <sub>2</sub> = 0.0768             |
| Final R indexes [all data]                  | R <sub>1</sub> = 0.0484, wR <sub>2</sub> = 0.0825             |
| Largest diff. peak/hole / e Å <sup>-3</sup> | 0.50/-0.42                                                    |
| Flack parameter                             | 0.067(8)                                                      |

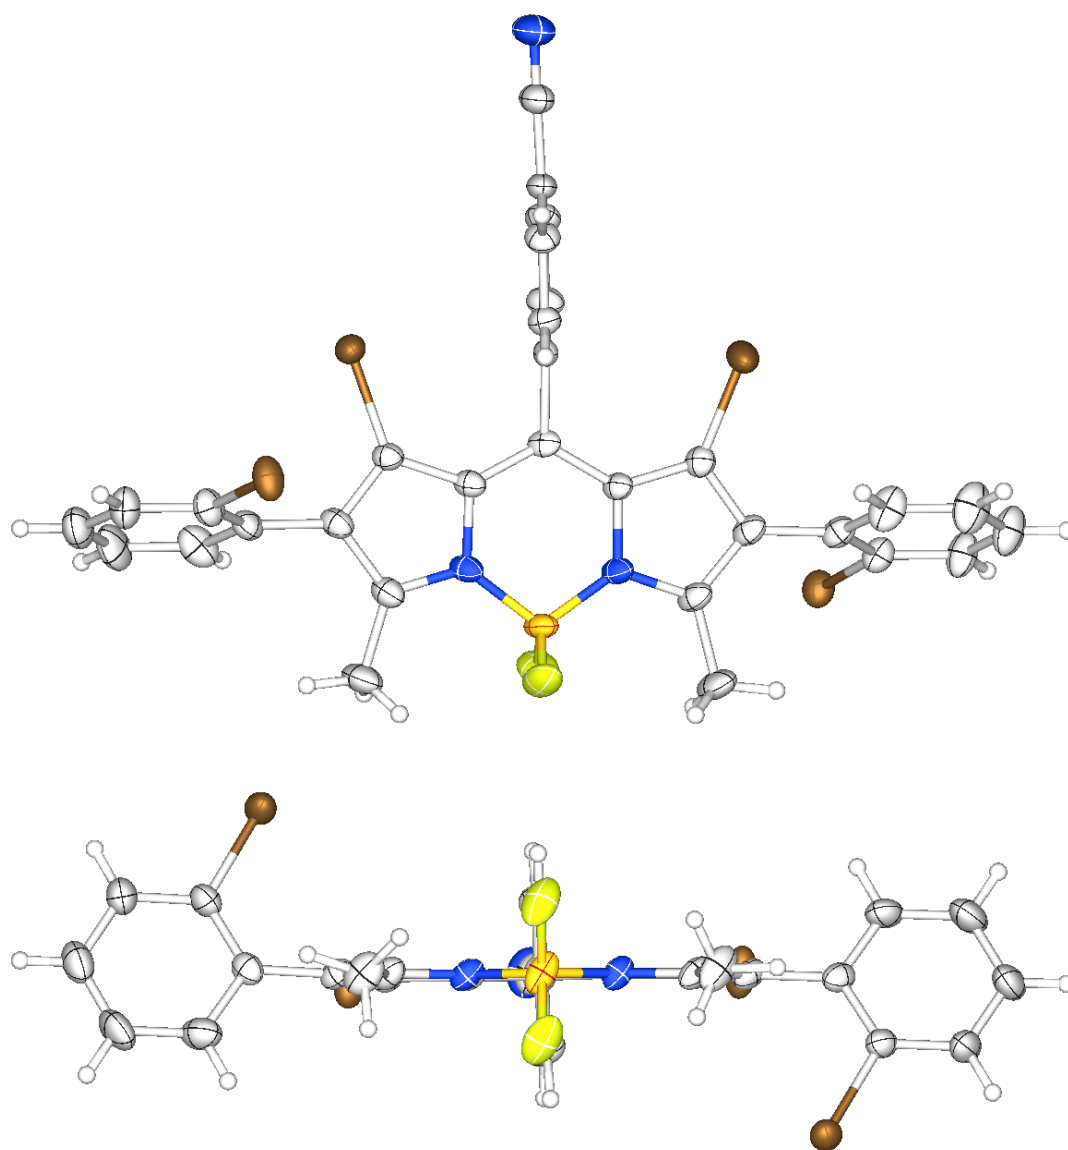

**Figure S6.** Single-crystal structure of **4c**, with thermal ellipsoids shown at 50% probability.

**Table S6** Crystal data and structure refinement for **4c**. CCDC number= 2366260

|                                               |                                                               |
|-----------------------------------------------|---------------------------------------------------------------|
| Identification code                           | <b>4c</b>                                                     |
| Empirical formula                             | $C_{30}H_{18}BBr_4F_2N_3$                                     |
| Formula weight                                | 788.92                                                        |
| Temperature/K                                 | 193.00                                                        |
| Crystal system                                | monoclinic                                                    |
| Space group                                   | $P2_1/c$                                                      |
| $a/\text{\AA}$                                | 11.1457(4)                                                    |
| $b/\text{\AA}$                                | 37.5112(13)                                                   |
| $c/\text{\AA}$                                | 7.6375(3)                                                     |
| $\alpha/^\circ$                               | 90                                                            |
| $\beta/^\circ$                                | 99.698(2)                                                     |
| $\gamma/^\circ$                               | 90                                                            |
| Volume/ $\text{\AA}^3$                        | 3147.5(2)                                                     |
| Z                                             | 4                                                             |
| $\rho_{\text{calc}}/\text{cm}^3$              | 1.665                                                         |
| $\mu/\text{mm}^{-1}$                          | 6.540                                                         |
| F(000)                                        | 1528.0                                                        |
| Crystal size/ $\text{mm}^3$                   | $0.13 \times 0.12 \times 0.11$                                |
| Radiation                                     | Cu $K\alpha$ ( $\lambda = 1.54178$ )                          |
| $2\Theta$ range for data collection/ $^\circ$ | 4.712 to 136.846                                              |
| Index ranges                                  | $-13 \leq h \leq 12, -45 \leq k \leq 38, -8 \leq l \leq 9$    |
| Reflections collected                         | 24312                                                         |
| Independent reflections                       | 5596 [ $R_{\text{int}} = 0.0517, R_{\text{sigma}} = 0.0400$ ] |
| Data/restraints/parameters                    | 5596/2/382                                                    |
| Goodness-of-fit on $F^2$                      | 1.077                                                         |
| Final R indexes [ $I \geq 2\sigma(I)$ ]       | $R_1 = 0.0400, wR_2 = 0.0988$                                 |
| Final R indexes [all data]                    | $R_1 = 0.0458, wR_2 = 0.1006$                                 |
| Largest diff. peak/hole / $e \text{\AA}^{-3}$ | 0.65/-0.62                                                    |

### 3. Synthesis and Characterization

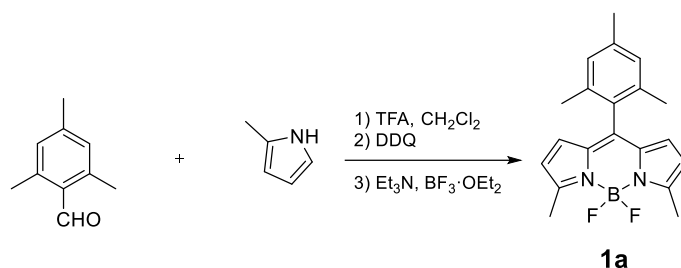

Compound **1a** was prepared by the reported procedure<sup>[6]</sup>.

To a solution of 2,4,6-trimethylbenzaldehyde (1482 mg, 10 mmol) and 2-methylpyrrole (1663 mg, 20.5 mmol) in CH<sub>2</sub>Cl<sub>2</sub> (250 mL), 2 drops of trifluoroacetic acid were added. After being stirred overnight at room temperature, the reaction mixture was treated with a solution of 2,3-dichloro-5,6-dicyano-1,4-benzoquinone (DDQ, 2270 mg, 1.0 equiv) in CH<sub>2</sub>Cl<sub>2</sub> (50 mL) at room temperature for 1 h. Then, the resulting solution were treated by Et<sub>3</sub>N (13 mL, 93.2 mol) and BF<sub>3</sub>·OEt<sub>2</sub> (13 mL, 102.6 mol). After being stirred for 0.5 h at room temperature, thus the mixture was washed with brine and then dried with Na<sub>2</sub>SO<sub>4</sub>. After removing the solvents by rotary evaporation, the residue was purified by column chromatography on silica (petroleum ether/CH<sub>2</sub>Cl<sub>2</sub> =3/1, v/v) and recrystallized with methanol/dichloromethane to give 1.15 g of compound **1a** in 34% yield as orange red solids. NMR data of this compound agreed with the reported one<sup>[6]</sup>. **Mp** 216.5-217.3°C. **<sup>1</sup>H NMR** (400 MHz, Chloroform-*d*) δ 6.92 (s, 2H), 6.46 (d, *J* = 4.1 Hz, 2H), 6.19 (d, *J* = 4.1 Hz, 2H), 2.64 (s, 6H), 2.34 (s, 3H), 2.10 (s, 6H). **<sup>13</sup>C NMR** (101 MHz, Chloroform-*d*) δ 157.77, 142.53, 138.54, 136.86, 134.97, 130.30, 129.24, 128.23, 119.59, 21.36, 20.18, 15.16.

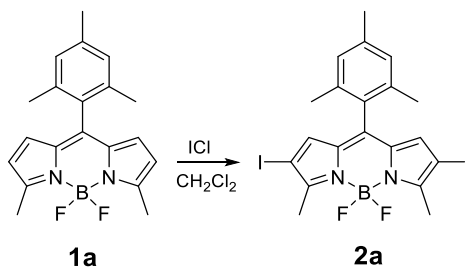

Compound **2a**:

To a solution of Compound **1a** (845 mg, 2.5 mmol) in CH<sub>2</sub>Cl<sub>2</sub> (100 mL), a solution of ICl (1015 mg, 6.25 mmol) in MeOH (10 mL) was added dropwise. After being stirred 15 min at room temperature, the reaction mixture was treated with a



saturated solution of Na<sub>2</sub>S<sub>2</sub>O<sub>3</sub> (100 mL) at same temperature for 1 h. Then, the mixture was washed with brine and then dried with Na<sub>2</sub>SO<sub>4</sub>. After removing the solvents by rotary evaporation, the residue was purified by column chromatography on silica (petroleum ether/CH<sub>2</sub>Cl<sub>2</sub> =3/1, v/v) and recrystallized with methanol/dichloromethane to give 1.34 g of compound **2a** in 91% yield as purple solids. <sup>1</sup>H NMR (400 MHz, Chloroform-*d*) δ 6.93 (s, 2H), 6.70 (s, 2H), 2.65 (s, 6H), 2.35 (s, 3H), 2.09 (s, 6H). <sup>13</sup>C NMR (101 MHz, Chloroform-*d*) δ 159.00, 141.60, 139.23, 136.72, 135.65, 129.25, 128.48, 78.03, 21.36, 20.22, 15.75. HRMS (ESI-Orbitrap, [M-1]<sup>-</sup>, 100%): calcd for C<sub>20</sub>H<sub>18</sub>BF<sub>2</sub>I<sub>2</sub>N<sub>2</sub>, 588.9615; found, 588.9633.

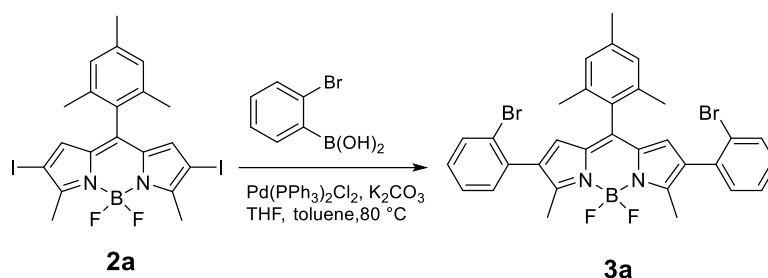

#### Compound **3a**:

Compound **2a** (147 mg, 0.25 mmol), 2-bromophenylboronic acid (126 mg, 0.625 mmol), Pd(PPh<sub>3</sub>)<sub>2</sub>Cl<sub>2</sub> (18 mg, 0.025 mmol) and K<sub>2</sub>CO<sub>3</sub> (743 mg, 5.375 mmol) in THF/toluene/H<sub>2</sub>O (15 mL/15 mL/3 mL) was stirred at 80 °C for 1.5 h under argon atmosphere. After cooling to room temperature, the mixture was poured into water and extracted with CH<sub>2</sub>Cl<sub>2</sub>. The extractions were washed with brine and then dried with Na<sub>2</sub>SO<sub>4</sub>. After removing the solvents by rotary evaporation, the residue was purified by column chromatography on silica (petroleum ether/CH<sub>2</sub>Cl<sub>2</sub> =2/1, v/v) to afford crude product **3a**, after recrystallization with methanol/dichloromethane to give 108 mg of compound **3a** in 67% yield as red solids. <sup>1</sup>H NMR (400 MHz, Chloroform-*d*) δ 7.62 (dd, *J* = 8.0, 1.0 Hz, 2H), 7.30 (td, *J* = 7.5, 1.2 Hz, 2H), 7.23 (dd, *J* = 7.6, 1.8 Hz, 2H), 7.19-7.13 (m, 2H), 6.91 (s, 2H), 6.57 (s, 2H), 2.57 (s, 6H), 2.31 (s, 3H), 2.21 (s, 6H). <sup>13</sup>C NMR (101 MHz, Chloroform-*d*) δ 156.23, 142.94, 138.69, 136.95, 135.33, 133.93, 133.20, 133.11, 131.85, 130.10, 129.36, 128.95, 128.34, 127.40, 124.49, 21.32, 20.43, 13.98. HRMS (ESI-Orbitrap, [M-1]<sup>-</sup>, 100%): calcd for C<sub>32</sub>H<sub>26</sub>BBr<sub>2</sub>F<sub>2</sub>N<sub>2</sub>, 647.0498; found, 647.0514.

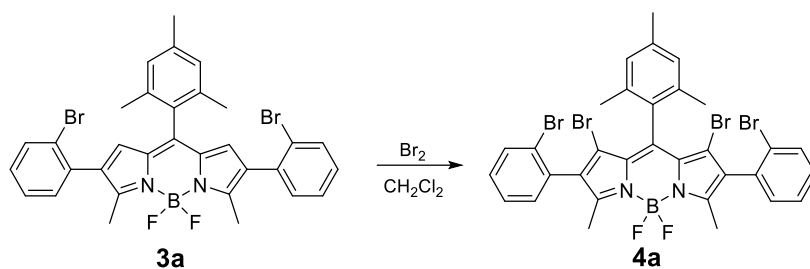

#### Compound **4a**:

To a solution of compound **3a** (65 mg, 0.1 mmol) in dry  $\text{CH}_2\text{Cl}_2$  (30 mL), a solution of liquid bromine (31  $\mu\text{L}$ , 0.6 mmol) in dry  $\text{CH}_2\text{Cl}_2$  (5 mL) were added dropwise. After being stirred for 0.5 h at room temperature, the reaction mixture was treated with a saturated solution of  $\text{Na}_2\text{S}_2\text{O}_3$  (100 mL) at same temperature for 0.5 h. Then, the mixture was washed with brine and then dried with  $\text{Na}_2\text{SO}_4$ . After removing the solvents by rotary evaporation, the residue was purified by column chromatography on silica (petroleum ether/ethyl acetate =500/1, v/v) and recrystallized with methanol/dichloromethane to give 41 mg of compound **4a** in 51% yield as orange red solids.  $^1\text{H NMR}$  (400 MHz, Chloroform-*d*)  $\delta$  7.70 - 7.64 (m, 2H), 7.37 (td,  $J = 7.5, 1.1$  Hz, 2H), 7.28 (d,  $J = 1.7$  Hz, 2H), 7.21 (dd,  $J = 7.5, 1.6$  Hz, 2H), 6.92 (s, 2H), 2.47 (s, 6H), 2.31 (s, 3H), 2.15 (s, 6H).  $^{13}\text{C NMR}$  (101 MHz, Chloroform-*d*)  $\delta$  155.56, 143.89, 139.40, 136.33, 135.11, 133.94, 133.07, 132.45, 130.23, 129.10, 128.86, 127.88, 127.61, 125.31, 121.05, 21.58, 20.19, 14.15. **HRMS** (ESI-Orbitrap,  $[\text{M}]^-$ , 100%): calcd for  $\text{C}_{32}\text{H}_{25}\text{BBr}_4\text{F}_2\text{N}_2$ , 805.8766; found, 805.8768.

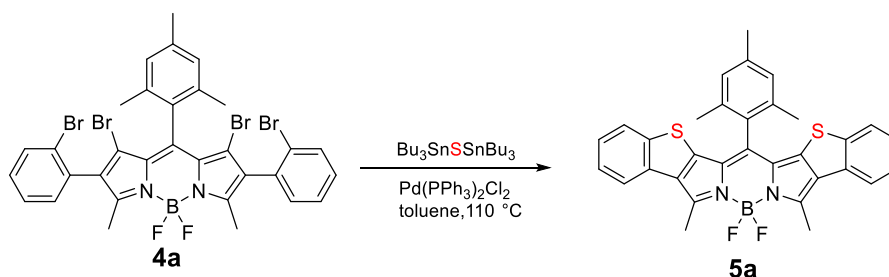

#### Compound **5a**:

A Schlenk tube was charged with compound **4a** (24 mg, 0.03 mmol) and  $\text{Pd}(\text{PPh}_3)_2\text{Cl}_2$  (2.1 mg, 0.1 eq.) under an argon atmosphere at room temperature. Then, a solution of Bis(tri-*n*-butyltin)sulfide (26.6  $\mu\text{L}$ , 0.066 mmol) in dry toluene (1.0 mL) was added. The reaction mixture was stirred at 110  $^\circ\text{C}$  for 12 h and cooled down to

room temperature, then, the mixture was washed with brine and then dried with  $\text{Na}_2\text{SO}_4$ . After removing the solvents by rotary evaporation, the crude product was purified by column chromatography on silica (petroleum ether/ $\text{CH}_2\text{Cl}_2 = 2/1$ , v/v) and recrystallized with methanol/dichloromethane to give 12 mg of compound **5a** in 73 % yield as golden metallic luster solids. **Mp** 279.6-281.0°C.  **$^1\text{H}$  NMR** (400 MHz, Chloroform-*d*)  $\delta$  7.89 (d,  $J = 7.8$  Hz, 2H), 7.58 (d,  $J = 8.0$  Hz, 2H), 7.42 - 7.36 (m, 2H), 7.28 (d,  $J = 1.1$  Hz, 2H), 7.18 (s, 2H), 3.06 (s, 6H), 2.51 (s, 3H), 2.15 (s, 6H).  **$^{13}\text{C}$  NMR** (101 MHz, Chloroform-*d*)  $\delta$  149.06, 144.69, 141.16, 140.01, 136.48, 135.61, 133.25, 131.70, 130.04, 129.31, 125.59, 125.06, 125.00, 123.90, 121.36, 21.76, 19.62, 14.81. **HRMS** (ESI-Orbitrap,  $[\text{M}]^+$ , 100%): calcd for  $\text{C}_{32}\text{H}_{25}\text{BF}_2\text{N}_2\text{S}_2$ , 550.1515; found, 550.1520.

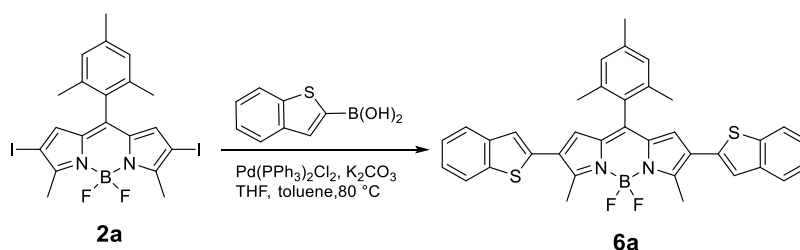

#### Compound **6a**:

The synthesis method resembles that of compound **3a**, by the reaction of compound **2a** (147 mg, 0.25 mmol) with benzo[*b*]thiophen-2-ylboronic acid (111 mg, 0.625 mmol). The compound was purified by column chromatography on silica (petroleum ether/ $\text{CH}_2\text{Cl}_2 = 2/1$ , v/v) to afford crude product **6a**, after recrystallization with methanol/dichloromethane to give 84 mg of compound **6a** in 56% yield as black solids.  **$^1\text{H}$  NMR** (400 MHz, Chloroform-*d*)  $\delta$  7.78 (d,  $J = 7.8$  Hz, 2H), 7.76 - 7.71 (m, 2H), 7.37 - 7.28 (m, 6H), 7.00 (s, 2H), 6.69 (s, 2H), 2.94 (s, 6H), 2.40 (s, 3H), 2.19 (s, 6H).  **$^{13}\text{C}$  NMR** (101 MHz, Chloroform-*d*)  $\delta$  156.15, 142.84, 140.56, 139.37, 139.07, 136.89, 136.41, 134.22, 129.80, 128.55, 127.44, 126.41, 124.83, 124.56, 123.61, 122.24, 121.20, 21.44, 20.38, 14.92. **HRMS** (ESI-Orbitrap,  $[\text{M}]^+$ , 100%): calcd for  $\text{C}_{36}\text{H}_{29}\text{BF}_2\text{N}_2\text{S}_2$ , 602.1828; found, 602.1838.

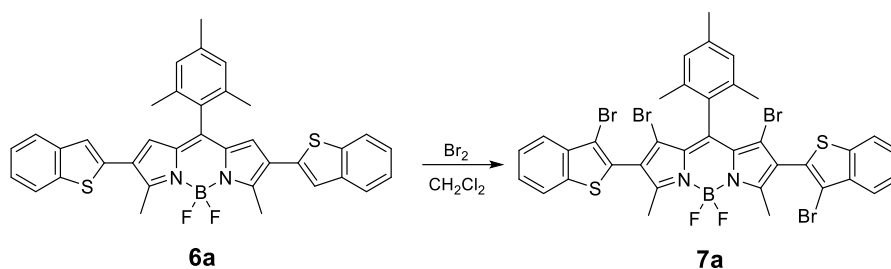

#### Compound **7a**:

The synthesis method resembles that of compound **4a**, by the reaction of compound **6a** (60 mg, 0.1 mmol) with a solution of liquid bromine (154  $\mu$ L, 3 mmol) in dry  $\text{CH}_2\text{Cl}_2$  (5 mL). The compound was purified by column chromatography on silica (petroleum ether/ $\text{CH}_2\text{Cl}_2$  = 10/1, v/v) and recrystallized with methanol/dichloromethane to give 69 mg of compound **7a** in 75% yield as dark-brown solids.  $^1\text{H NMR}$  (400 MHz, Chloroform-*d*)  $\delta$  7.85 (dd,  $J$  = 11.7, 8.1 Hz, 4H), 7.53 - 7.41 (m, 4H), 6.95 (s, 2H), 2.61 (s, 6H), 2.33 (s, 3H), 2.18 (d,  $J$  = 3.1 Hz, 6H).  $^{13}\text{C NMR}$  (101 MHz, Chloroform-*d*)  $\delta$  157.03, 139.74, 139.47, 139.46, 138.26, 138.23, 136.21(t,  $J$  = 7.1 Hz), 129.41, 129.31, 129.26, 129.18, 127.46, 126.14, 125.47, 123.99, 122.68, 110.82, 21.61, 20.27, 14.43. **HRMS** (ESI-Orbitrap,  $[\text{M}-1]^-$ , 100%): calcd for  $\text{C}_{36}\text{H}_{24}\text{BBr}_4\text{F}_2\text{N}_2\text{S}_2$ , 916.8129; found, 916.8152.

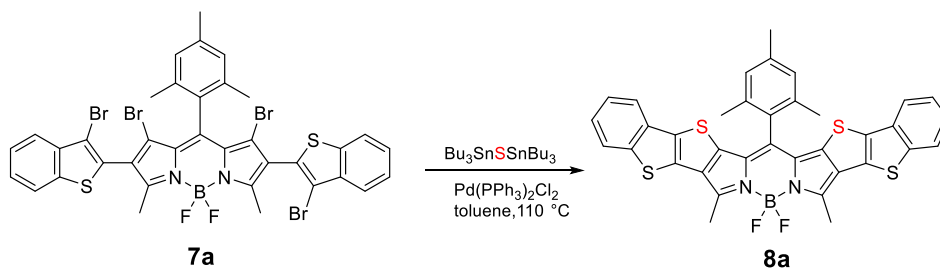

#### Compound **8a**:

The synthesis method resembles that of compound **5a**, by the reaction of compound **7a** (37 mg, 0.04 mmol) with Bis(tri-*n*-butyltin)sulfide (35.5  $\mu$ L, 0.088 mmol). The crude product was purified by column chromatography on silica (petroleum ether/ $\text{CH}_2\text{Cl}_2$  = 2/1, v/v) and recrystallized with methanol/dichloromethane to give 10 mg of compound **8a** in 39% yield as dark-brown solids. **Mp** > 320°C.  $^1\text{H NMR}$  (400 MHz, Chloroform-*d*)  $\delta$  7.85 (d,  $J$  = 7.8 Hz, 2H), 7.65 (d,  $J$  = 7.8 Hz, 2H), 7.39 - 7.30 (m, 4H), 7.22 (s, 2H), 2.98 (s, 6H),

2.55 (s, 3H), 2.19 (s, 6H).  $^{13}\text{C}$  NMR (101 MHz, Chloroform-*d*)  $\delta$  147.56, 142.89, 142.18, 140.15, 136.95, 135.49, 134.77, 133.10, 131.52, 130.28, 129.08, 128.77, 125.66, 125.18, 124.59, 124.25, 120.85, 21.82, 19.65, 14.72. HRMS (ESI-Orbitrap,  $[\text{M}]^+$ , 100%): calcd for  $\text{C}_{36}\text{H}_{25}\text{BF}_2\text{N}_2\text{S}_4$ , 662.0956; found, 662.0967.

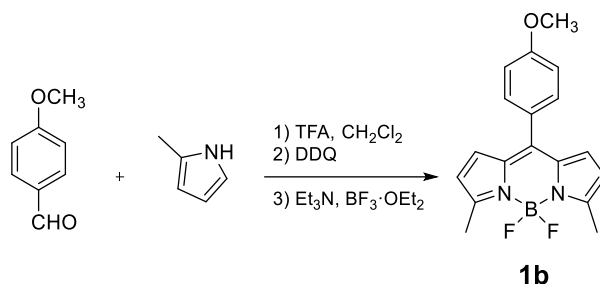

#### Compound **1b**:

The synthesis method resembles that of compound **1a**, by the reaction of *p*-anisaldehyde (1.36 g, 10 mmol) with 2-methylpyrrole (1663 mg, 20.5 mmol). The compound was purified by column chromatography on silica (petroleum ether/ $\text{CH}_2\text{Cl}_2$  =3/1, v/v) and recrystallized with methanol/dichloromethane to give 1.04 g of compound **1b** in 32% yield as orange red solids. NMR data of this compound agreed with the reported one<sup>[7]</sup>. **Mp** 191.0-192.5°C.  $^1\text{H}$  NMR (400 MHz,  $\text{CDCl}_3$ )  $\delta$  7.45 (d,  $J$  = 8.7 Hz, 2H), 7.00 (d,  $J$  = 8.7 Hz, 2H), 6.75 (d,  $J$  = 4.1 Hz, 2H), 6.27 (d,  $J$  = 4.2 Hz, 2H), 3.89 (s, 3H), 2.65 (s, 6H).

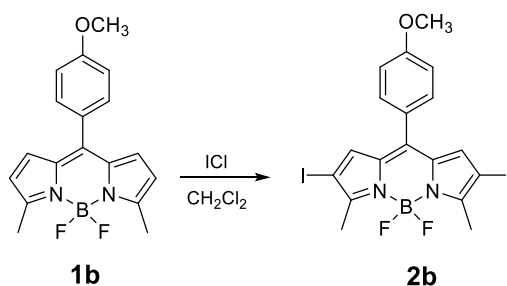

#### Compound **2b**:

The synthesis method resembles that of compound **2a**, by the reaction of compound **1b** (815 mg, 2.5 mmol) with ICl (1015 mg, 6.25 mmol). The compound was purified by column chromatography on silica (petroleum ether/ $\text{CH}_2\text{Cl}_2$  =3/1, v/v) and recrystallized with methanol/dichloromethane to give 1.30 g of compound **2b** in 90% yield as purple solids.  $^1\text{H}$  NMR (400 MHz, Chloroform-*d*)  $\delta$  7.43 (d,  $J$  = 8.7 Hz,

2H), 7.02 (d,  $J = 8.7$  Hz, 2H), 6.98 (s, 2H), 3.90 (s, 3H), 2.65 (s, 6H).  $^{13}\text{C}$  NMR (101 MHz, Chloroform- $d$ )  $\delta$  162.21, 158.39, 141.90, 137.01, 135.44, 132.42, 127.44, 126.00, 114.47, 55.89, 15.79. **HRMS** (ESI-Orbitrap,  $[\text{M}]^+$ , 100%): calcd for  $\text{C}_{18}\text{H}_{15}\text{BF}_2\text{I}_2\text{N}_2\text{O}$ , 577.9329; found, 577.9337.

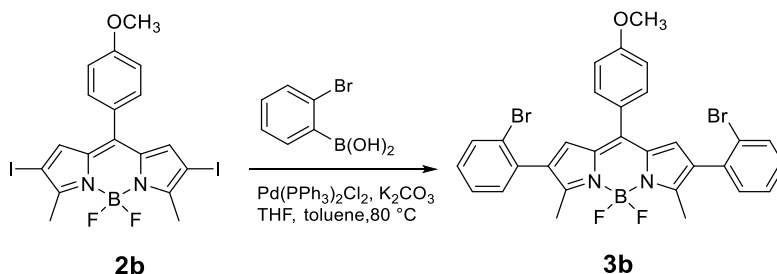

Compound **3b**:

The synthesis method resembles that of compound **3a**, by the reaction of compound **2b** (145 mg, 0.25 mmol) with 2-bromophenylboronic acid (126 mg, 0.625 mmol). The compound was purified by column chromatography on silica (petroleum ether/ $\text{CH}_2\text{Cl}_2 = 2/1$ , v/v) to afford crude product **3b**, after recrystallization with methanol/dichloromethane to give 102 mg of compound **3b** in 64% yield as red solids.  $^1\text{H}$  NMR (400 MHz, Chloroform- $d$ )  $\delta$  7.65 (d,  $J = 7.9$  Hz, 2H), 7.56 (d,  $J = 8.4$  Hz, 2H), 7.33 (t,  $J = 7.3$  Hz, 2H), 7.25 (s, 2H), 7.19 (t,  $J = 7.3$  Hz, 2H), 7.00 (d,  $J = 8.4$  Hz, 2H), 6.85 (s, 2H), 3.86 (s, 3H), 2.57 (s, 6H).  $^{13}\text{C}$  NMR (101 MHz, Chloroform- $d$ )  $\delta$  161.71, 155.66, 143.17, 135.55, 133.67, 133.21, 132.48, 131.97, 130.02, 129.42, 127.47, 126.68, 124.52, 114.11, 55.70, 13.97. **HRMS** (ESI-Orbitrap,  $[\text{M}]^+$ , 100%): calcd for  $\text{C}_{30}\text{H}_{23}\text{BBr}_2\text{F}_2\text{N}_2\text{O}$ , 636.0212; found, 636.0223.

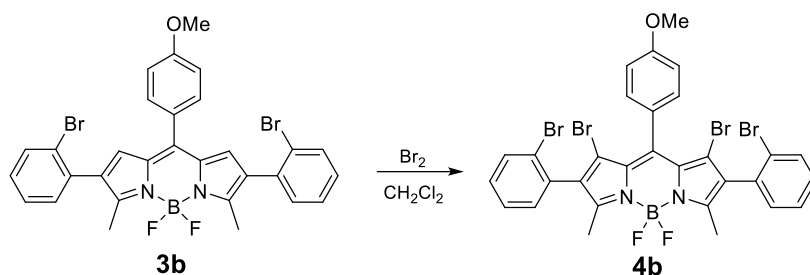

Compound **4b**:

The synthesis method resembles that of compound **4a**, by the reaction of compound **3a** (64 mg, 0.1 mmol) with liquid bromine (31  $\mu\text{L}$ , 0.6 mmol). The compound was purified by column chromatography on silica (petroleum ether/ethyl

acetate =100/1, v/v) and recrystallized with methanol/dichloromethane to give 39 mg of compound **4b** in 49% yield as orange red solids. **<sup>1</sup>H NMR** (400 MHz, Chloroform-*d*)  $\delta$  7.67 (d, *J* = 7.8 Hz, 2H), 7.36 (t, *J* = 7.2 Hz, 2H), 7.29-7.24 (m, 4H), 7.17 (d, *J* = 7.5 Hz, 2H), 7.01 (d, *J* = 8.6 Hz, 2H), 3.86 (s, 3H), 2.47 (s, 6H). **<sup>13</sup>C NMR** (101 MHz, Chloroform-*d*)  $\delta$  161.10, 155.83, 143.57, 135.49, 133.99, 133.07, 132.61, 130.89, 130.27, 130.08, 127.62, 125.15, 123.63, 121.55, 114.64, 55.56, 14.21. **HRMS** (ESI-Orbitrap, [M-1]<sup>-</sup>, 100%): calcd for C<sub>30</sub>H<sub>20</sub>BBr<sub>4</sub>F<sub>2</sub>N<sub>2</sub>O, 792.8324; found, 792.8345.

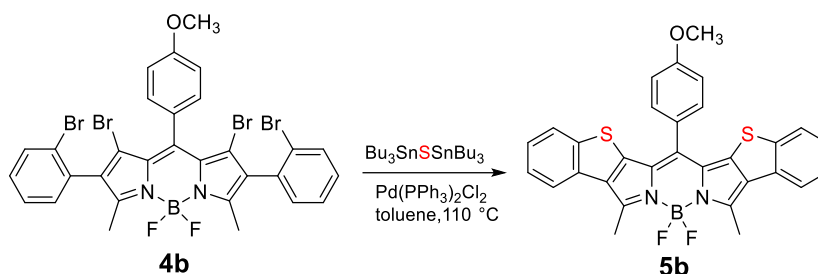

#### Compound **5b**:

The synthesis method resembles that of compound **5a**, by the reaction of compound **4b** (24 mg, 0.03 mmol) with bis(tri-*n*-butyltin)sulfide (26.6  $\mu$ L, 0.066 mmol). The crude product was purified by column chromatography on silica (petroleum ether/CH<sub>2</sub>Cl<sub>2</sub> = 2/1, v/v) and recrystallized with methanol/dichloromethane to give 11 mg of compound **5b** in 69 % yield as golden metallic luster solids. **Mp** 292.2-293.5°C. **<sup>1</sup>H NMR** (400 MHz, Chloroform-*d*)  $\delta$  7.88 (d, *J* = 7.8 Hz, 2H), 7.59 (d, *J* = 8.0 Hz, 2H), 7.52 (d, *J* = 8.6 Hz, 2H), 7.39 (t, *J* = 7.4 Hz, 2H), 7.28 (d, *J* = 7.6 Hz, 2H), 7.22 (d, *J* = 8.6 Hz, 2H), 4.00 (s, 3H), 3.05 (s, 6H). **<sup>13</sup>C NMR** (101 MHz, Chloroform-*d*)  $\delta$  161.65, 148.85, 144.34, 141.87, 137.35, 133.53, 131.55, 130.03, 125.76, 125.67, 125.54, 125.07, 123.63, 121.31, 115.72, 55.73, 14.74. **HRMS** (ESI-Orbitrap, [M]<sup>+</sup>, 100%): calcd for C<sub>30</sub>H<sub>21</sub>BF<sub>2</sub>N<sub>2</sub>OS<sub>2</sub>, 538.1151; found, 538.1157.

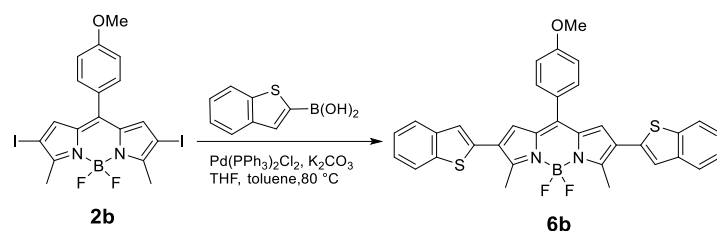

#### Compound **6b**:

The synthesis method resembles that of compound **3a**, by the reaction of compound **2b** (145 mg, 0.25 mmol) with benzo[*b*]thiophen-2-ylboronic acid (111 mg, 0.625 mmol). The compound was purified by column chromatography on silica (petroleum ether/CH<sub>2</sub>Cl<sub>2</sub> =2/1, v/v) to afford crude product **6b**, after recrystallization with methanol/dichloromethane to give 89 mg of compound **6b** in 60% yield as dark-brown solids. <sup>1</sup>H NMR (400 MHz, CDCl<sub>3</sub>) δ 7.82 - 7.78 (m, 2H), 7.76 (dt, *J* = 8.0, 0.9 Hz, 2H), 7.56 (d, *J* = 8.7 Hz, 2H), 7.44 - 7.28 (m, 6H), 7.09 (d, *J* = 8.8 Hz, 2H), 6.98 (s, 2H), 3.94 (s, 3H), 2.93 (s, 6H). <sup>13</sup>C NMR (101 MHz, Chloroform-*d*) δ 161.95, 155.44, 143.00, 140.63, 139.38, 136.57, 133.90, 132.40, 127.89, 127.18, 126.41, 124.83, 124.55, 123.62, 122.25, 121.13, 114.38, 55.78, 14.78. HRMS (ESI-Orbitrap, [M]<sup>+</sup>, 100%): calcd for C<sub>34</sub>H<sub>25</sub>BF<sub>2</sub>N<sub>2</sub>OS<sub>2</sub>, 590.1464; found, 590.1474.

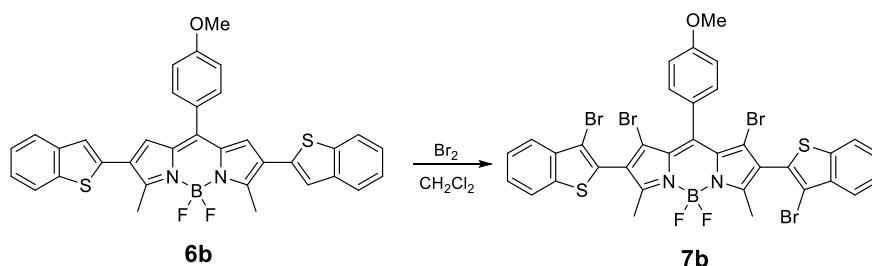

#### Compound **7b**:

The synthesis method resembles that of compound **4a**, by the reaction of compound **6b** (59 mg, 0.1 mmol) with a solution of liquid bromine (180 μL, 3.5 mmol) in dry CH<sub>2</sub>Cl<sub>2</sub> (5 mL). The compound was purified by column chromatography on silica (petroleum ether/CH<sub>2</sub>Cl<sub>2</sub> =12/1, v/v) and recrystallized with methanol/dichloromethane to give 66 mg of compound **7b** in 73% yield as red solids. <sup>1</sup>H NMR (400 MHz, Chloroform-*d*) δ 7.87 (d, *J* = 7.9 Hz, 2H), 7.83 (d, *J* = 7.9 Hz, 2H), 7.54 - 7.40 (m, 4H), 7.36 - 7.26 (m, 2H), 7.04 (d, *J* = 8.7 Hz, 2H), 3.87 (s, 3H), 2.60 (s, 6H). <sup>13</sup>C NMR (101 MHz, Chloroform-*d*) δ 161.31, 157.22, 144.51, 139.53,



138.23, 130.74 (t,  $J = 7.8$  Hz), 130.55, 129.34, 127.49, 126.16, 125.47, 124.00, 123.88, 123.15, 122.69, 114.85, 110.78, 55.58, 14.42. **HRMS** (ESI-Orbitrap,  $[M-1]^-$ , 100%): calcd for  $C_{34}H_{20}BBr_4F_2N_2OS_2$ , 904.7765; found, 904.7783.

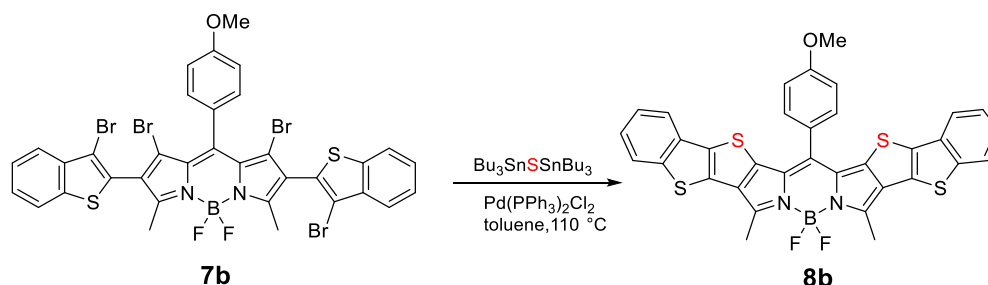

#### Compound **8b**:

The synthesis method resembles that of compound **5a**, by the reaction of compound **7b** (36 mg, 0.04 mmol) with bis(tri-*n*-butyltin)sulfide (35.5  $\mu$ L, 0.088 mmol). The crude product was purified by column chromatography on silica (petroleum ether/ $CH_2Cl_2 = 2/1$ , v/v) and recrystallized with methanol/dichloromethane to give 9.1 mg of compound **8b** in 35% yield as dark blue solids.  $Mp > 320^\circ C$ .  $^1H$  NMR (400 MHz,  $CD_2Cl_2$ )  $\delta$  7.90 (d,  $J = 7.9$  Hz, 2H), 7.69 (d,  $J = 7.5$  Hz, 2H), 7.62 (d,  $J = 8.7$  Hz, 2H), 7.45 - 7.39 (m, 2H), 7.39 - 7.33 (m, 2H), 7.29 (d,  $J = 8.7$  Hz, 2H), 4.05 (s, 3H), 2.94 (s, 6H).  $^{13}C$  NMR (101 MHz, Chloroform-*d*)  $\delta$  142.21, 136.63, 135.64, 133.07, 129.93, 128.59, 126.28, 125.66, 125.26, 125.23, 124.62, 124.30, 124.25, 121.72, 120.82, 118.20, 115.94, 55.80, 14.66. HRMS (ESI-Orbitrap,  $[M]^+$ , 100%): calcd for  $C_{34}H_{21}BF_2N_2OS_4$ , 650.0592; found, 650.0605.

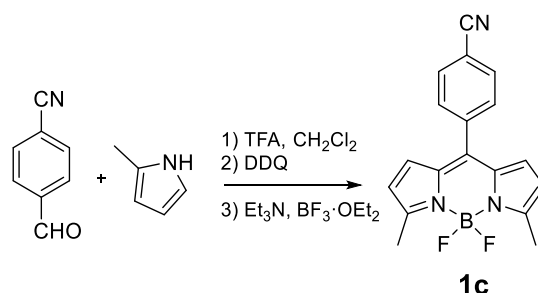

#### Compound **1c**:

The synthesis method resembles that of compound **1a**, by the reaction of 4-cyanobenzaldehyde (1.31 g, 10 mmol) with 2-methylpyrrole (1663 mg, 20.5 mmol).

The compound was purified by column chromatography on silica (petroleum ether/CH<sub>2</sub>Cl<sub>2</sub> =3/1, v/v) and recrystallized with methanol/dichloromethane to give 1.06 g of compound **1c** in 33% yield as orange red solids. NMR data of this compound agreed with the reported one<sup>[7]</sup>. **Mp** 185.7-187.0°C. **<sup>1</sup>H NMR** (400 MHz, Chloroform-*d*) δ 7.79 (d, *J* = 8.3 Hz, 2H), 7.61 (d, *J* = 8.3 Hz, 2H), 6.60 (d, *J* = 4.1 Hz, 2H), 6.30 (d, *J* = 4.1 Hz, 2H), 2.66 (s, 6H). **<sup>13</sup>C NMR** (101 MHz, Chloroform-*d*) δ 159.16, 139.68, 138.87, 134.25, 132.24, 131.13, 130.18, 120.38 (d, *J* = 2.9 Hz), 118.30, 114.05, 15.24.

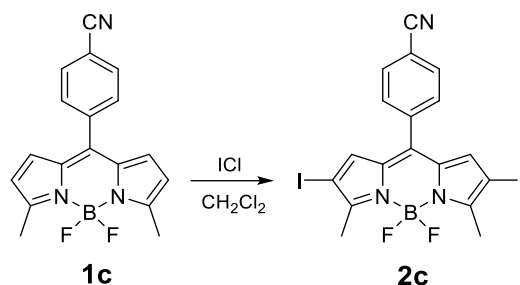

#### Compound **2c**:

The synthesis method resembles that of compound **2a**, by the reaction of compound **1c** (803 mg, 2.5 mmol) with ICl (1015 mg, 6.25 mmol). The compound was purified by column chromatography on silica (petroleum ether/CH<sub>2</sub>Cl<sub>2</sub> =3/1, v/v) and recrystallized with methanol/dichloromethane to give 1.26 g of compound **2c** in 88% yield as purple solids. **<sup>1</sup>H NMR** (400 MHz, Chloroform-*d*) δ 7.82 (d, *J* = 8.4 Hz, 2H), 7.59 (d, *J* = 8.6 Hz, 2H), 6.85 (s, 2H), 2.67 (s, 6H). **<sup>13</sup>C NMR** (101 MHz, Chloroform-*d*) δ 160.36, 138.31, 137.88, 136.55, 134.94, 132.55, 131.04, 118.04, 114.68, 78.88, 15.88. **HRMS** (ESI-Orbitrap, [M]<sup>-</sup>, 100%): calcd for C<sub>18</sub>H<sub>12</sub>BF<sub>2</sub>I<sub>2</sub>N<sub>3</sub>, 572.9176; found, 572.9188.

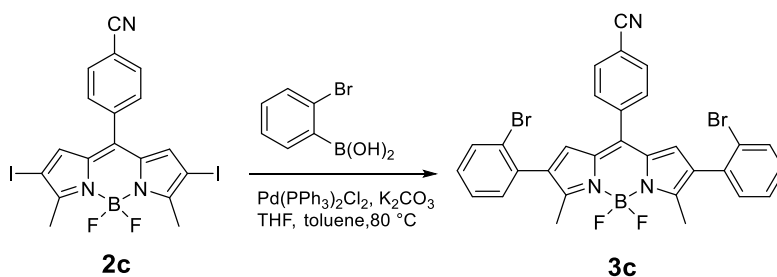

### Compound **3c**:

The synthesis method resembles that of compound **3a**, by the reaction of compound **2c** (143 mg, 0.25 mmol) with 2-bromophenylboronic acid (126 mg, 0.625 mmol). The compound was purified by column chromatography on silica (petroleum ether/CH<sub>2</sub>Cl<sub>2</sub> =2/1, v/v) to afford crude product **3c**, after recrystallization with methanol/dichloromethane to give 93 mg of compound **3c** in 59% yield as red solids. <sup>1</sup>H NMR (400 MHz, Chloroform-*d*) δ 7.79 (d, *J* = 8.3 Hz, 2H), 7.71 (d, *J* = 8.2 Hz, 2H), 7.66 (d, *J* = 8.0 Hz, 2H), 7.33 (t, *J* = 7.0 Hz, 2H), 7.25 - 7.17 (m, 4H), 6.69 (s, 2H), 2.58 (s, 6H). <sup>13</sup>C NMR (101 MHz, Chloroform-*d*) δ 157.76, 139.90, 138.72, 134.92, 134.17, 133.29, 132.35, 131.84, 131.28, 129.74, 129.50, 127.59, 124.39, 118.26, 114.19, 14.14. HRMS (ESI-Orbitrap, [M-1]<sup>-</sup>, 100%): calcd for C<sub>30</sub>H<sub>19</sub>BBr<sub>2</sub>F<sub>2</sub>N<sub>3</sub>, 629.9981; found, 629.9999.

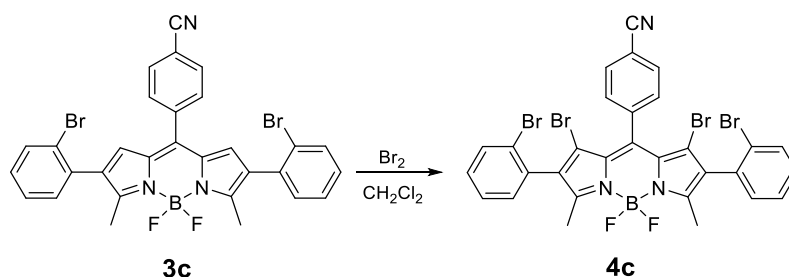

### Compound **4c**:

The synthesis method resembles that of compound **4a**, by the reaction of compound **3c** (63 mg, 0.1 mmol) with liquid bromine (31 μL, 0.6 mmol). The compound was purified by column chromatography on silica (petroleum ether/ethyl acetate =100/1, v/v) and recrystallized with methanol/dichloromethane to give 32 mg of compound **4c** in 41% yield as orange red solids. <sup>1</sup>H NMR (400 MHz, Chloroform-*d*) δ 7.79 (d, *J* = 8.7 Hz, 2H), 7.68 (dd, *J* = 8.0, 1.2 Hz, 2H), 7.57 (d, *J* = 8.6 Hz, 2H), 7.37 (td, *J* = 7.5, 1.3 Hz, 2H), 7.32 - 7.21 (m, 2H), 7.15 (dd, *J* = 7.5, 1.7 Hz, 2H), 2.49 (s, 6H). <sup>13</sup>C NMR (101 MHz, Chloroform-*d*) δ 157.10, 140.15, 136.54, 136.07, 133.41, 133.15, 132.91, 132.41, 130.87, 130.53, 128.98, 127.74, 124.97, 121.19, 118.76, 113.84, 14.33. HRMS (ESI-Orbitrap, [M]<sup>-</sup>, 100%): calcd for C<sub>30</sub>H<sub>18</sub>BBr<sub>4</sub>F<sub>2</sub>N<sub>3</sub>, 788.8249; found, 788.8249.

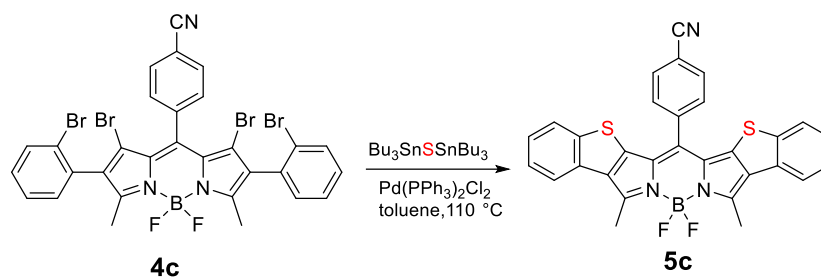

#### Compound **5c**:

The synthesis method resembles that of compound **5a**, by the reaction of compound **4c** (24 mg, 0.03 mmol) with bis(tri-*n*-butyltin)sulfide (26.6  $\mu$ L, 0.066 mmol). The crude product was purified by column chromatography on silica (petroleum ether/ $\text{CH}_2\text{Cl}_2$  = 2/1, v/v) and recrystallized with methanol/dichloromethane to give 10.5 mg of compound **5c** in 66 % yield as golden metallic luster solids. **Mp** 298.0-299.0°C.  **$^1\text{H NMR}$**  (400 MHz, Chloroform-*d*)  $\delta$  8.01 (d,  $J$  = 8.6 Hz, 2H), 7.88 (d,  $J$  = 7.5 Hz, 2H), 7.73 (d,  $J$  = 8.5 Hz, 2H), 7.60 (d,  $J$  = 7.9 Hz, 2H), 7.41 (td,  $J$  = 7.7, 1.1 Hz, 2H), 7.30 (ddd,  $J$  = 8.3, 7.3, 1.2 Hz, 2H), 3.05 (s, 6H).  **$^{13}\text{C NMR}$**  (101 MHz, Chloroform-*d*)  $\delta$  150.21, 144.06, 141.52, 138.43, 134.26, 134.16, 134.05, 131.33, 129.66, 125.88, 125.45, 124.81, 123.75, 121.44, 118.45, 114.75, 14.82. **HRMS** (ESI-Orbitrap,  $[\text{M}]^+$ , 100%): calcd for  $\text{C}_{30}\text{H}_{18}\text{BF}_2\text{N}_3\text{S}_2$ , 533.0998; found, 533.1007.

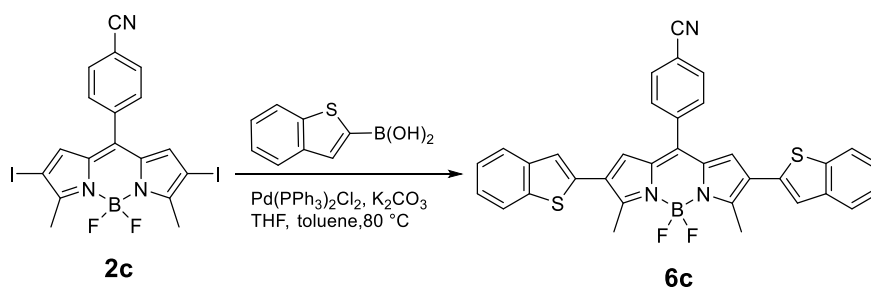

#### Compound **6c**:

The synthesis method resembles that of compound **3a**, by the reaction of compound **2c** (143 mg, 0.25 mmol) with benzo[*b*]thiophen-2-ylboronic acid (111 mg, 0.625 mmol). The compound was purified by column chromatography on silica (petroleum ether/ $\text{CH}_2\text{Cl}_2$  = 2/1, v/v) to afford crude product **6c**, after recrystallization with methanol/dichloromethane to give 81 mg of compound **6c** in 55% yield as modena solids.  **$^1\text{H NMR}$**  (400 MHz, Chloroform-*d*)  $\delta$  7.88 (d,  $J$  = 8.2 Hz, 2H), 7.80

(d,  $J = 7.7$  Hz, 2H), 7.76 (d,  $J = 7.5$  Hz, 2H), 7.71 (d,  $J = 8.2$  Hz, 2H), 7.40 - 7.29 (m, 6H), 6.80 (s, 2H), 2.95 (s, 6H).  $^{13}\text{C}$  NMR (101 MHz, Chloroform- $d$ )  $\delta$  157.46, 140.51, 139.60, 139.42, 138.43, 135.81, 133.48, 132.60, 131.18, 128.17, 127.15, 124.98, 124.84, 123.76, 122.30, 121.60, 118.22, 114.53, 14.97. **HRMS** (ESI-Orbitrap,  $[\text{M}]^+$ , 100%): calcd for  $\text{C}_{34}\text{H}_{22}\text{BF}_2\text{N}_3\text{S}_2$ , 585.1311; found, 585.1321.

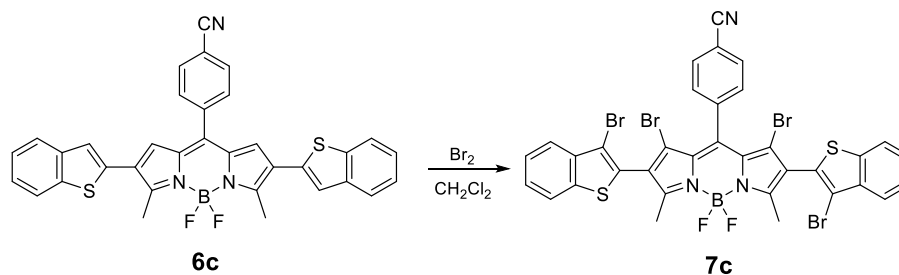

#### Compound **7c**:

The synthesis method resembles that of compound **4a**, by the reaction of compound **6c** (59 mg, 0.1 mmol) with a solution of liquid bromine (256  $\mu\text{L}$ , 5 mmol) in dry  $\text{CH}_2\text{Cl}_2$  (5 mL). The compound was purified by column chromatography on silica (petroleum ether/ $\text{CH}_2\text{Cl}_2$  =10/1, v/v) and recrystallized with methanol/dichloromethane to give 57 mg of compound **7c** in 63% yield as red solids.  $^1\text{H}$  NMR (400 MHz, Chloroform- $d$ )  $\delta$  7.87 (d,  $J = 7.9$  Hz, 2H), 7.83 (dd,  $J = 7.8, 4.1$  Hz, 4H), 7.61 (dd,  $J = 20.1, 7.6$  Hz, 2H), 7.53 - 7.48 (m, 2H), 7.46 (t,  $J = 7.5$  Hz, 2H), 2.62 (s, 6H).  $^{13}\text{C}$  NMR (101 MHz, Chloroform- $d$ )  $\delta$  158.47, 140.99, 139.48, 138.14, 136.09, 133.12 (t,  $J = 4.6$  Hz), 130.72 (t,  $J = 8.6$  Hz), 129.55, 128.58, 128.24, 126.36, 125.61, 124.06, 123.54, 122.71, 118.62, 114.18, 110.99, 14.55. **HRMS** (ESI-Orbitrap,  $[\text{M}-1]^-$ , 100%): calcd for  $\text{C}_{34}\text{H}_{17}\text{BBr}_4\text{F}_2\text{N}_3\text{S}_2$ , 899.7612; found, 899.7625.

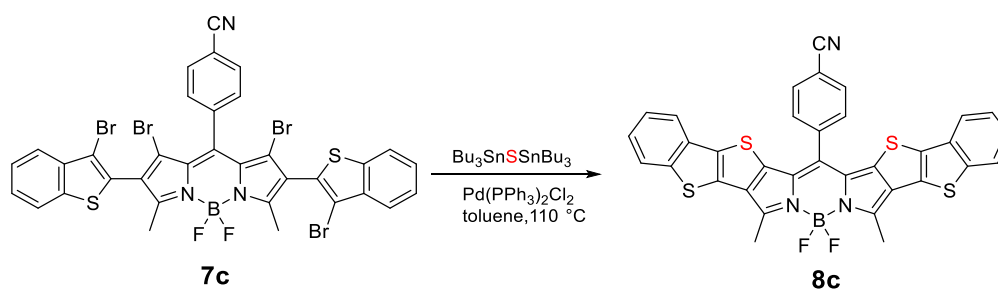

#### Compound **8c**:

The synthesis method resembles that of compound **5a**, by the reaction of compound **7c** (36 mg, 0.04 mmol) with bis(tri-*n*-butyltin)sulfide (35.5  $\mu$ L, 0.088 mmol). The crude product was purified by column chromatography on silica (petroleum ether/CH<sub>2</sub>Cl<sub>2</sub> = 2/1, v/v) and recrystallized with methanol/dichloromethane to give 8 mg of compound **8c** in 31% yield as bottle green solids. **Mp** > 320°C. **<sup>1</sup>H NMR** (400 MHz, Chloroform-*d*)  $\delta$  8.07 (d, *J* = 8.1 Hz, 2H), 7.87 (d, *J* = 7.9 Hz, 2H), 7.79 (d, *J* = 8.1 Hz, 2H), 7.67 (d, *J* = 7.6 Hz, 2H), 7.38 (dt, *J* = 21.9, 7.1 Hz, 4H), 2.97 (s, 6H). **<sup>13</sup>C NMR** (101 MHz, Chloroform-*d*)  $\delta$  166.51, 150.57, 148.75, 142.23, 138.48, 136.65, 134.40, 132.81, 129.57, 128.74, 125.44, 124.95, 124.30, 121.74, 120.87, 120.51, 118.43, 114.97, 14.75. **HRMS** (ESI-Orbitrap, [M-1]<sup>-</sup>, 100%): calcd for C<sub>34</sub>H<sub>17</sub>BF<sub>2</sub>N<sub>3</sub>S<sub>4</sub>, 644.0361; found, 644.0378.

#### 4. Photophysical Data

| Compound  | Solvent | $\lambda_{\max}^a$<br>[nm] | $\epsilon/10^5^b$<br>[M <sup>-1</sup> cm <sup>-1</sup> ] | $\lambda_{\text{ex}}^c$<br>[nm] | $\lambda_{\text{em}}^d$<br>[nm] | SS <sup>e</sup><br>[cm <sup>-1</sup> ] | $\Phi_f^f$<br>[%] | $\tau^g$<br>[ns] | $K_r/10^8^h$<br>[S <sup>-1</sup> ] | $K_{nr}/10^8^i$<br>[S <sup>-1</sup> ] |
|-----------|---------|----------------------------|----------------------------------------------------------|---------------------------------|---------------------------------|----------------------------------------|-------------------|------------------|------------------------------------|---------------------------------------|
| <b>1a</b> | DCM     | 512                        | 1.10                                                     | 512                             | 520                             | 300                                    | 89.1              | 6.69             | 1.33                               | 0.16                                  |
|           | THF     | 511                        | 1.56                                                     | 511                             | 519                             | 302                                    | 87.4              | 6.80             | 1.29                               | 0.19                                  |
|           | Toluene | 514                        | 1.23                                                     | 514                             | 522                             | 298                                    | 89.5              | 5.81             | 1.54                               | 0.18                                  |
| <b>5a</b> | DCM     | 564                        | 1.49                                                     | 563                             | 574                             | 309                                    | 84.2              | 5.17             | 1.63                               | 0.31                                  |
|           | THF     | 563                        | 1.67                                                     | 563                             | 572                             | 279                                    | 82.3              | 5.21             | 1.58                               | 0.34                                  |
|           | Toluene | 567                        | 1.93                                                     | 566                             | 575                             | 245                                    | 82.5              | 5.12             | 1.61                               | 0.34                                  |
| <b>8a</b> | DCM     | 623                        | 1.41                                                     | 623                             | 643                             | 499                                    | 81.7              | 6.66             | 1.23                               | 0.27                                  |
|           | THF     | 622                        | 1.22                                                     | 622                             | 641                             | 477                                    | 85.0              | 6.33             | 1.34                               | 0.24                                  |
|           | Toluene | 627                        | 1.46                                                     | 626                             | 642                             | 373                                    | 81.5              | 6.05             | 1.35                               | 0.31                                  |
| <b>1b</b> | DCM     | 510                        | 0.65                                                     | 509                             | 520                             | 377                                    | 25.5              | 2.53             | 1.01                               | 2.94                                  |
|           | THF     | 509                        | 0.82                                                     | 507                             | 519                             | 379                                    | 28.0              | 2.66             | 1.05                               | 2.71                                  |
|           | Toluene | 512                        | 0.80                                                     | 511                             | 522                             | 374                                    | 32.2              | 3.50             | 0.92                               | 1.94                                  |
| <b>5b</b> | DCM     | 569                        | 1.40                                                     | 568                             | 583                             | 422                                    | 83.4              | 5.39             | 1.55                               | 0.31                                  |
|           | THF     | 567                        | 1.59                                                     | 566                             | 580                             | 395                                    | 81.2              | 5.49             | 1.48                               | 0.34                                  |
|           | Toluene | 571                        | 1.66                                                     | 570                             | 584                             | 390                                    | 84.4              | 5.28             | 1.60                               | 0.30                                  |
| <b>8b</b> | DCM     | 629                        | 1.20                                                     | 629                             | 654                             | 608                                    | 76.7              | 6.76             | 1.13                               | 0.34                                  |
|           | THF     | 626                        | 0.83                                                     | 627                             | 650                             | 590                                    | 74.4              | 6.27             | 1.19                               | 0.41                                  |
|           | Toluene | 631                        | 0.92                                                     | 631                             | 652                             | 510                                    | 83.8              | 6.03             | 1.39                               | 0.27                                  |
| <b>1c</b> | DCM     | 517                        | 0.61                                                     | 516                             | 540                             | 824                                    | 4.0               | 0.52             | 0.76                               | 18.48                                 |
|           | THF     | 515                        | 0.83                                                     | 515                             | 540                             | 899                                    | 2.8               | 0.52             | 0.53                               | 18.70                                 |
|           | Toluene | 519                        | 0.76                                                     | 518                             | 542                             | 818                                    | 5.4               | 0.66             | 0.82                               | 14.33                                 |
| <b>5c</b> | DCM     | 575                        | 1.10                                                     | 575                             | 611                             | 1025                                   | 74.0              | 5.58             | 1.33                               | 0.47                                  |
|           | THF     | 572                        | 1.16                                                     | 571                             | 605                             | 954                                    | 75.6              | 5.23             | 1.45                               | 0.47                                  |
|           | Toluene | 577                        | 1.24                                                     | 575                             | 609                             | 911                                    | 73.0              | 5.40             | 1.35                               | 0.50                                  |
| <b>8c</b> | DCM     | 640                        | 0.58                                                     | 639                             | 690                             | 1132                                   | 45.5              | 5.30             | 0.86                               | 1.03                                  |
|           | THF     | 636                        | 0.68                                                     | 636                             | 685                             | 1125                                   | 43.2              | 5.00             | 0.86                               | 1.14                                  |
|           | Toluene | 643                        | 0.54                                                     | 642                             | 689                             | 1038                                   | 46.1              | 5.27             | 0.87                               | 1.02                                  |

**Table S7.** <sup>a</sup> Absorption maxima ( $\lambda_{\max}$ ). <sup>b</sup> molar extinction coefficients (at  $\lambda_{\max}$ ). <sup>c</sup> excitation wavelength. <sup>d</sup> emission maxima ( $\lambda_{\text{em}}$ ). <sup>e</sup> Stokes shifts. <sup>f</sup> fluorescence quantum yield ( $\Phi_f$ ). <sup>g</sup> lifetime ( $\tau$ ). <sup>h</sup> Radiation rate constant. <sup>i</sup> Non-radiation rate constant.

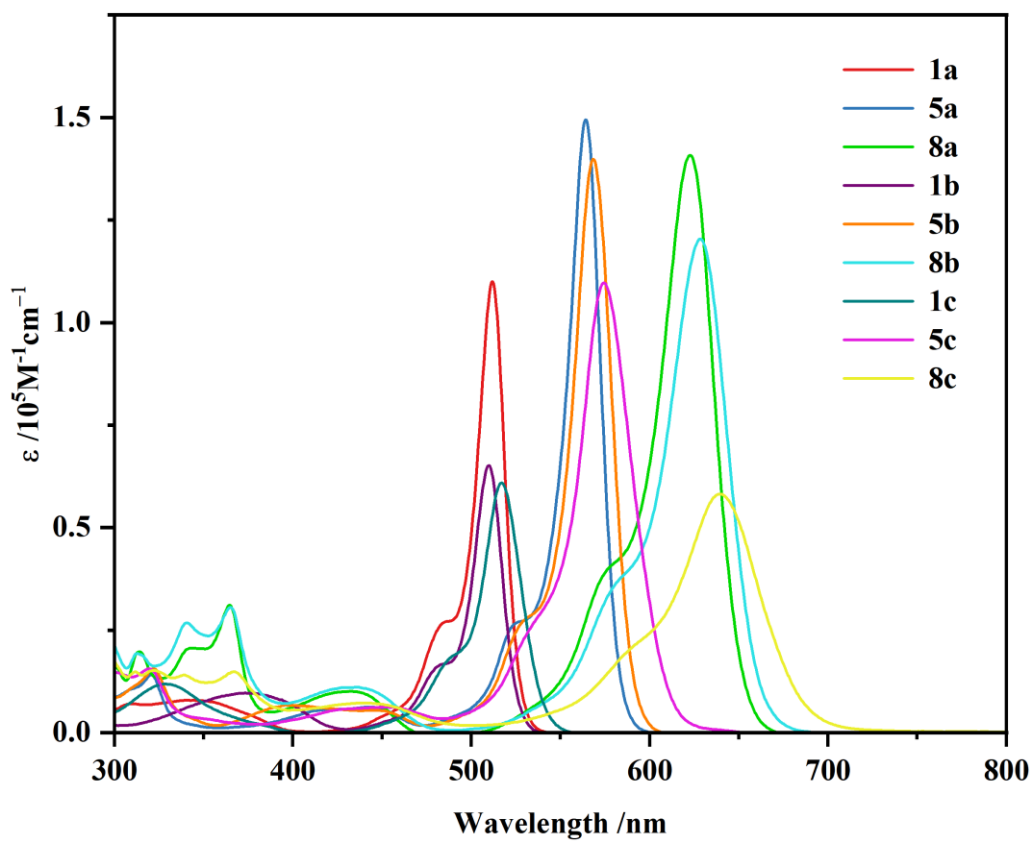

Figure S7. Absorption spectra of 1a-c, 5a-c and 8a-c in dichloromethane.

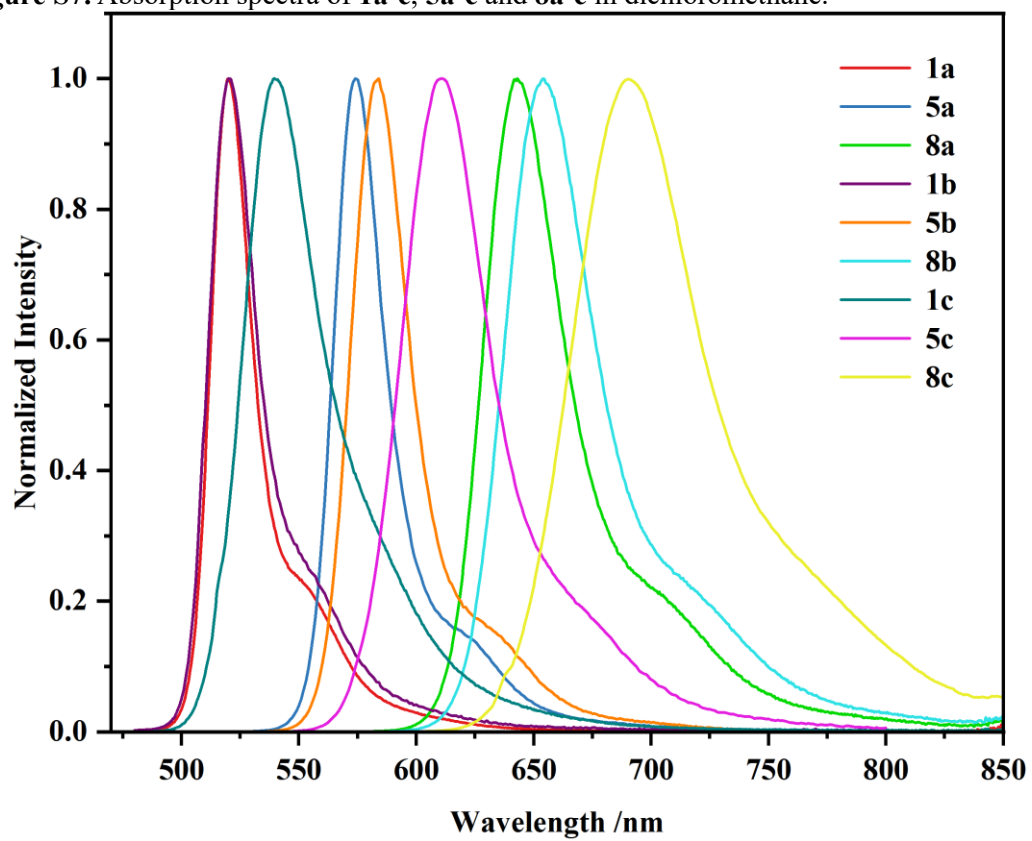

Figure S8. Normalized emission spectra of 1a-c, 5a-c and 8a-c in dichloromethane.



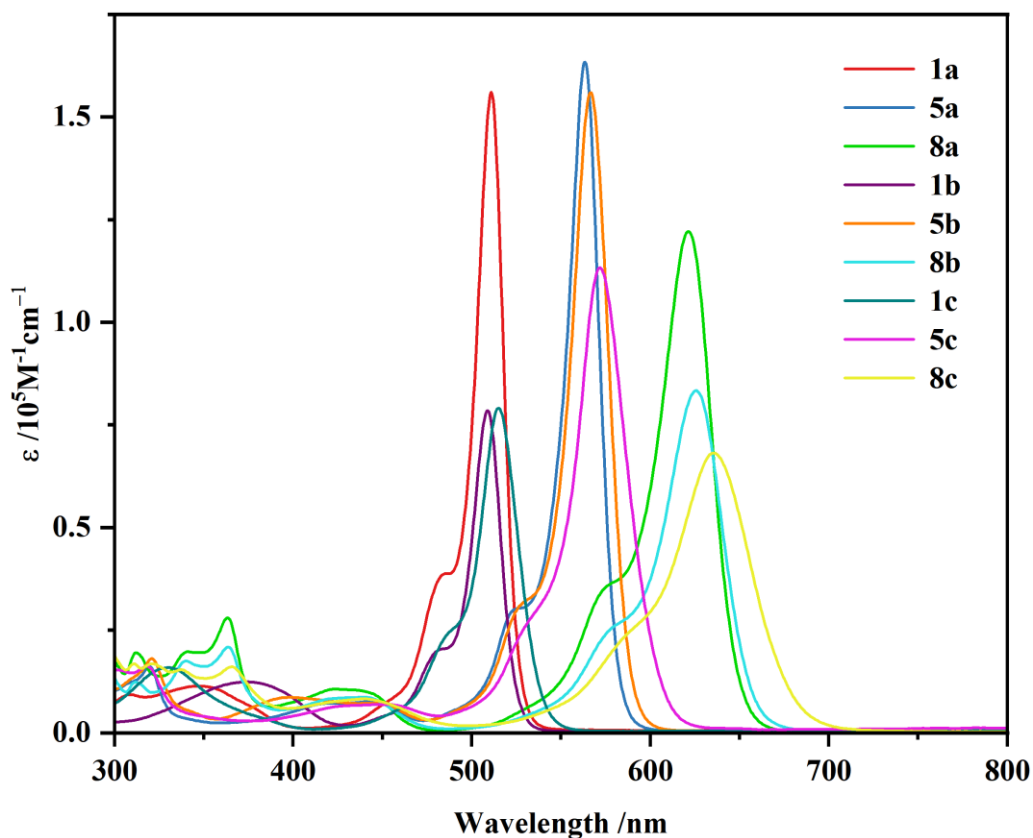

Figure S9. Absorption spectra of 1a-c, 5a-c and 8a-c in tetrahydrofuran.

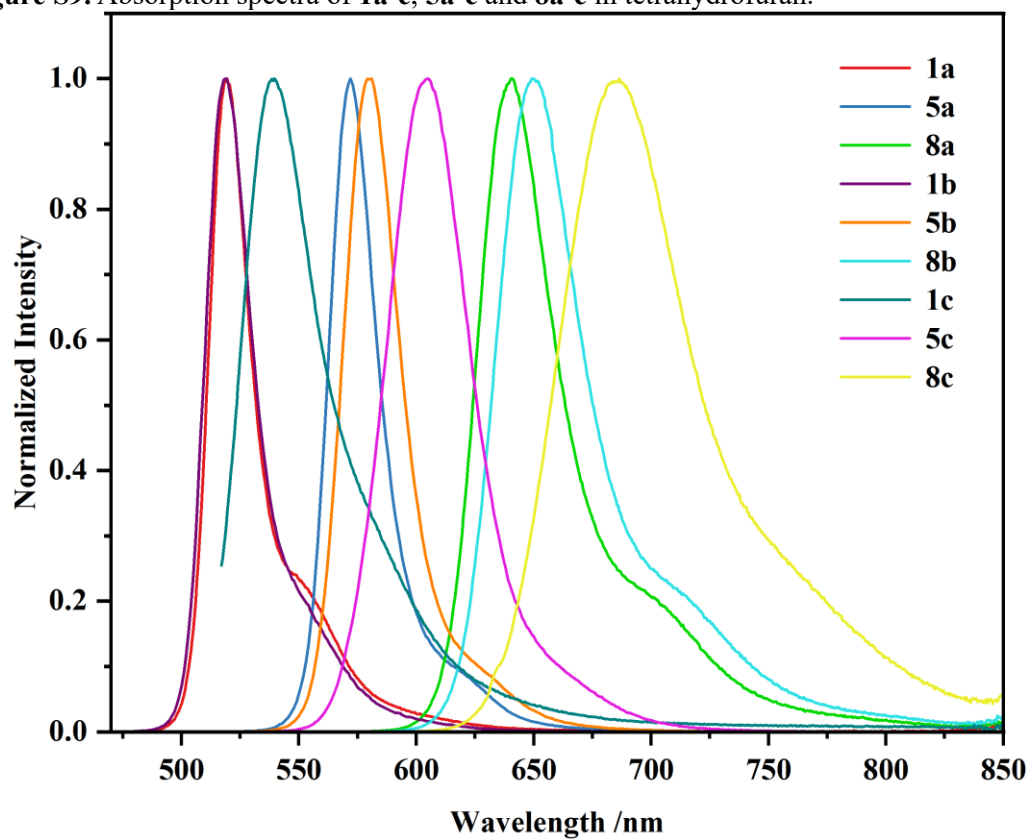

Figure S10. Normalized emission spectra of 1a-c, 5a-c and 8a-c in tetrahydrofuran.

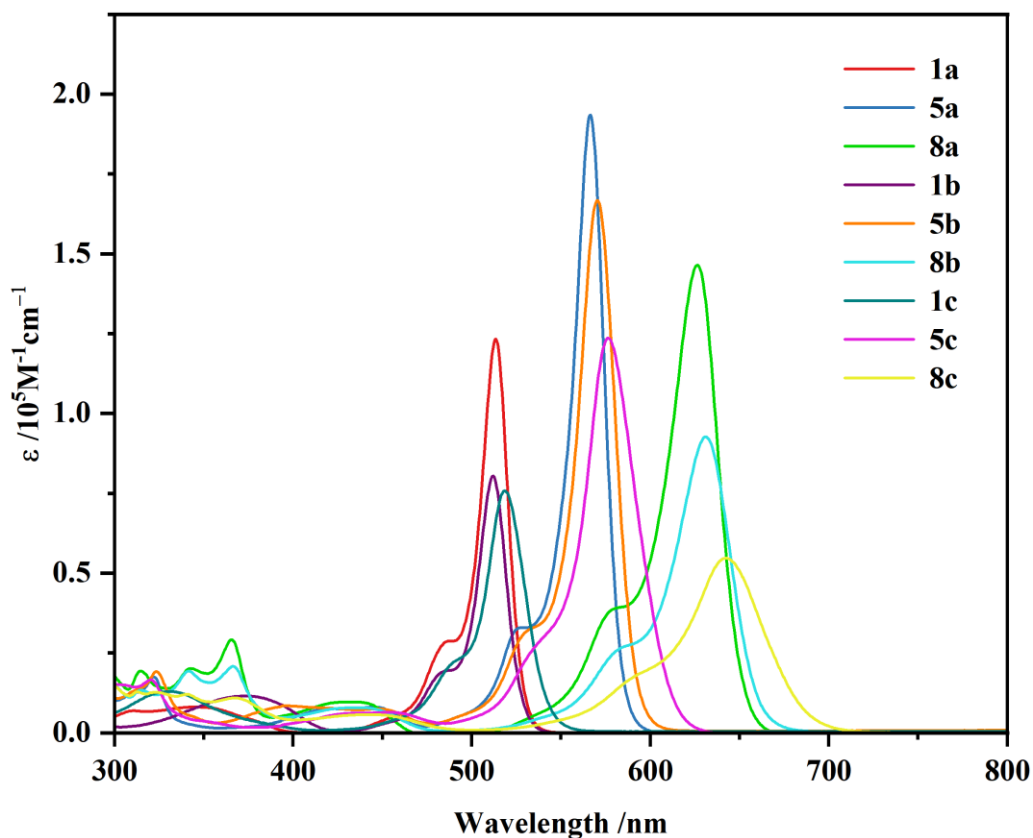

Figure S11. Absorption spectra of 1a-c, 5a-c and 8a-c in toluene.

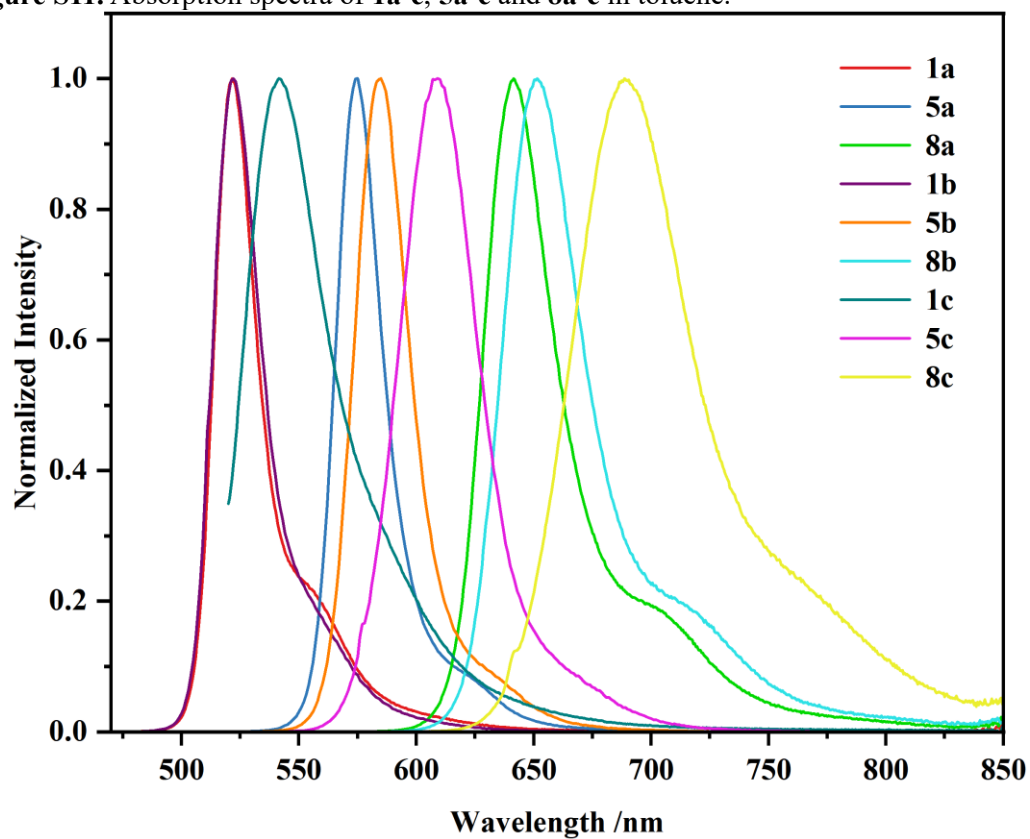

Figure S12. Normalized emission spectra of 1a-c, 5a-c and 8a-c in toluene.

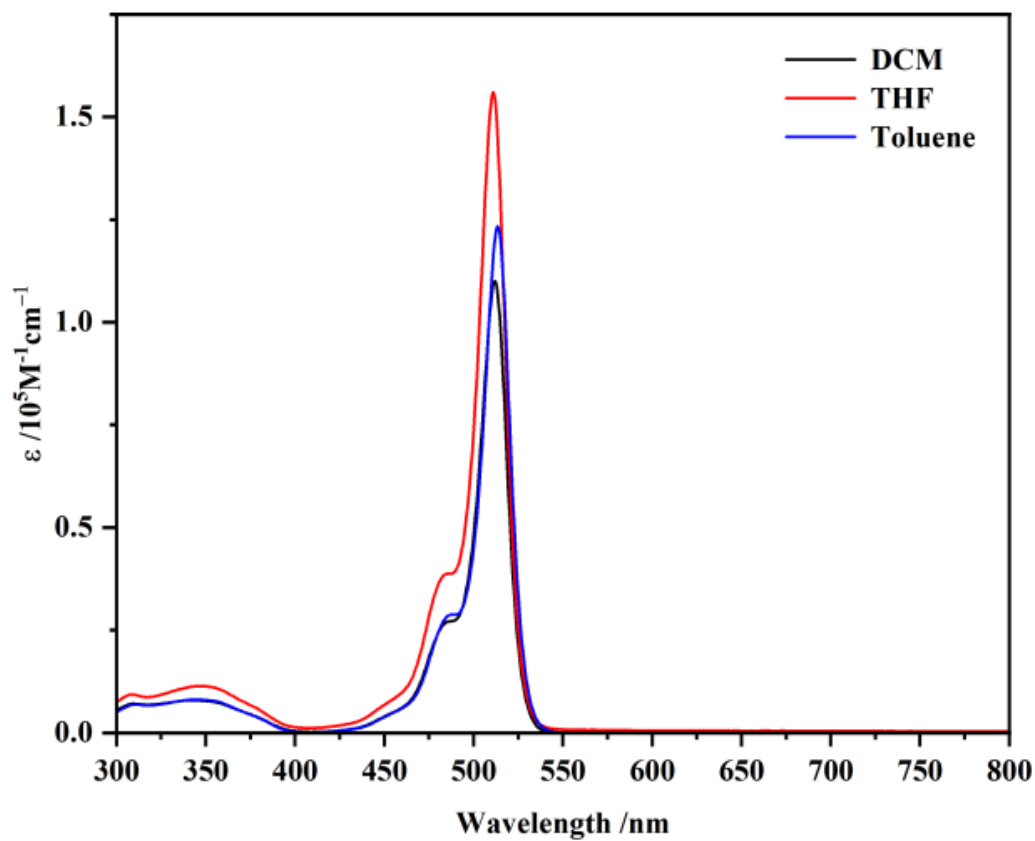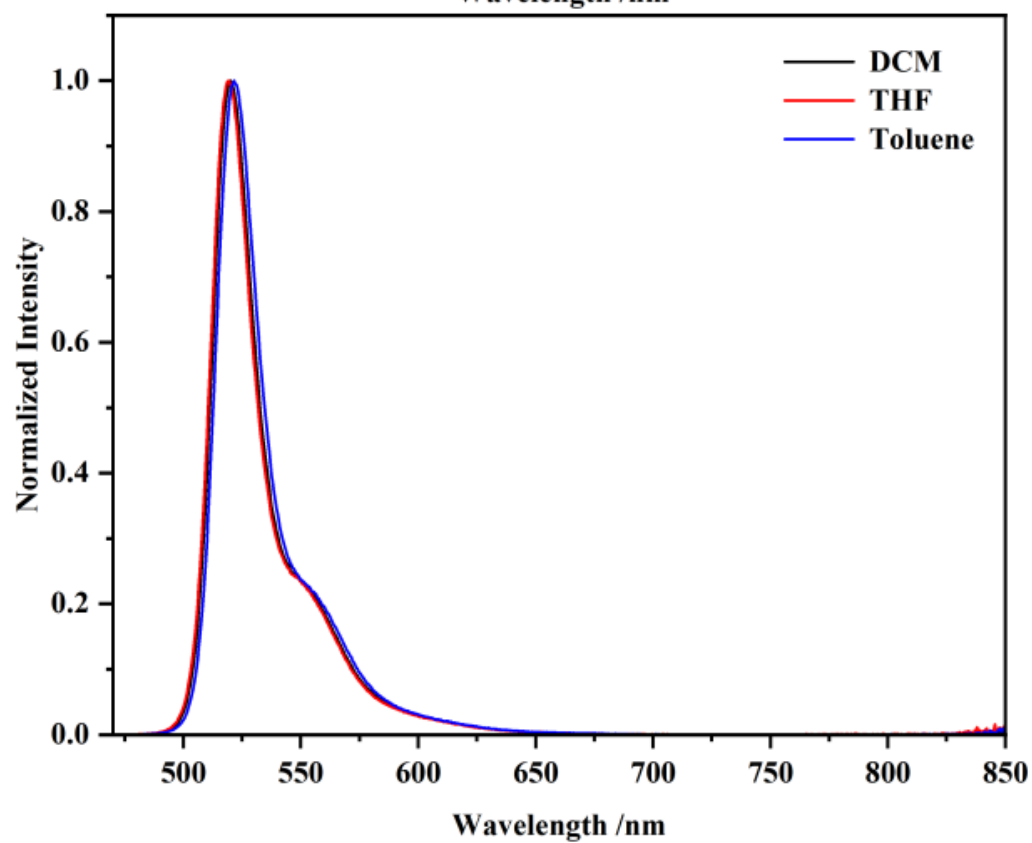

**Figure S13.** Absorption and Normalized emission spectra of **1a** recorded in DCM, THF and toluene at room temperature.

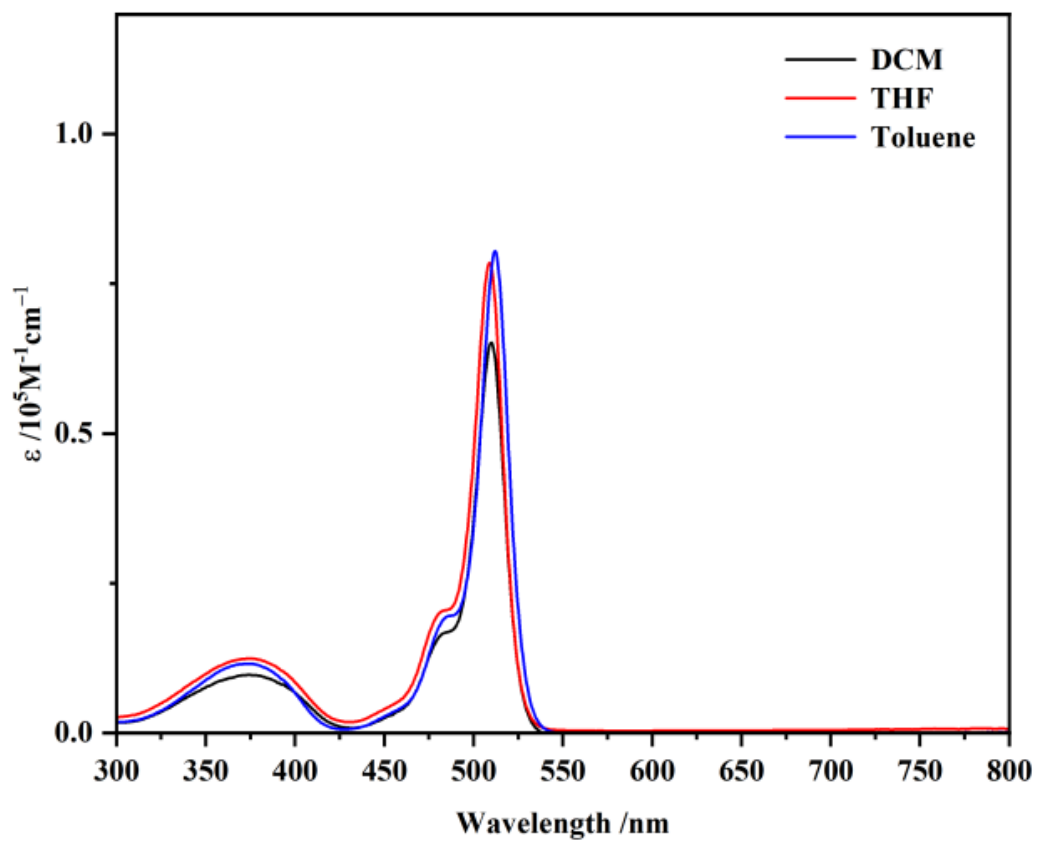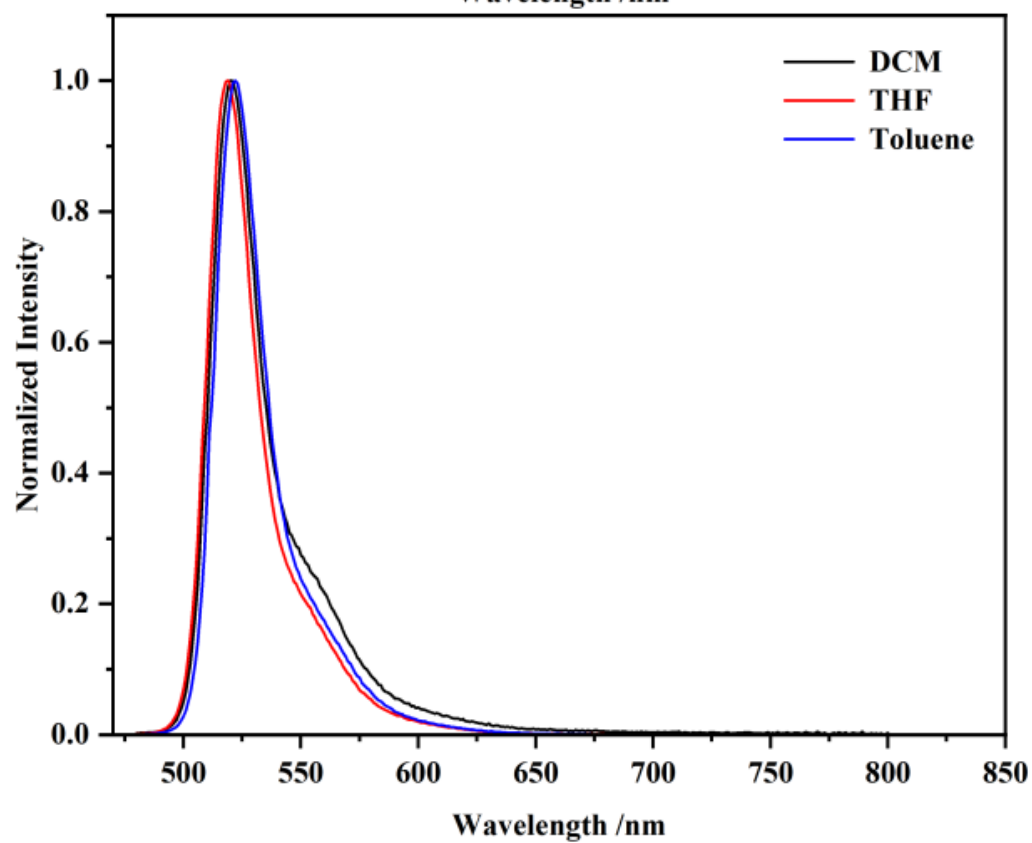

**Figure S14.** Absorption and Normalized emission spectra of **1b** recorded in DCM, THF and toluene at room temperature.

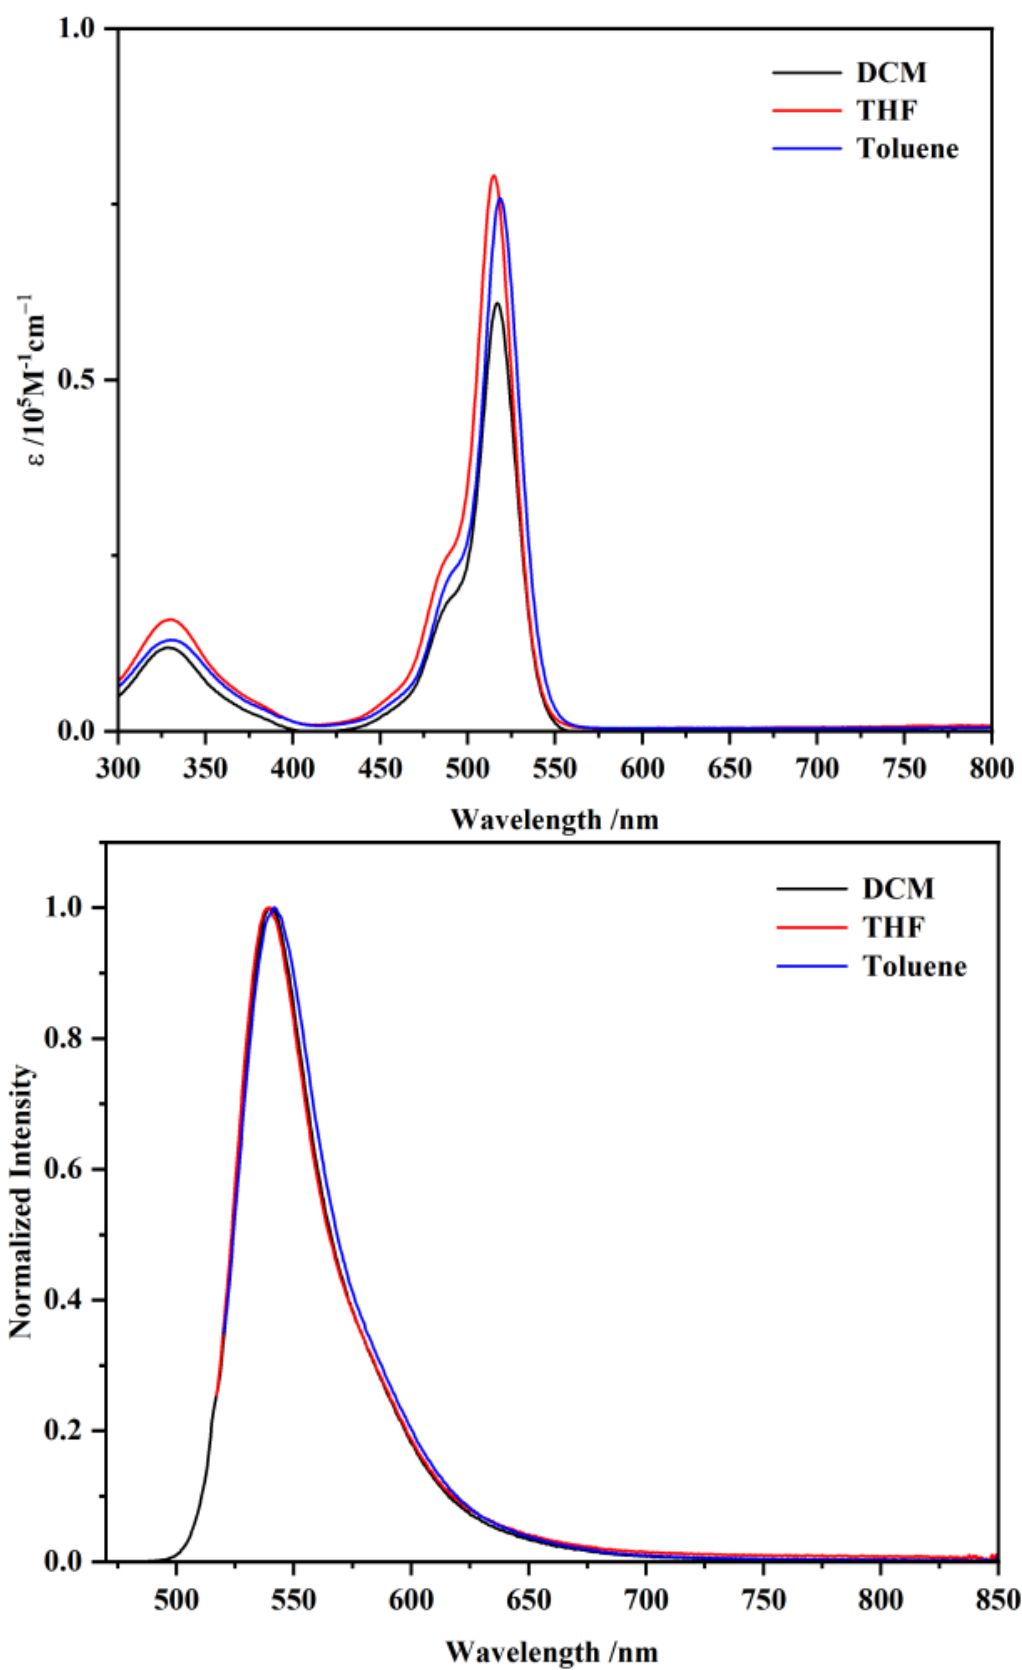

**Figure S15.** Absorption and Normalized emission spectra of **1c** recorded in DCM, THF and toluene at room temperature.

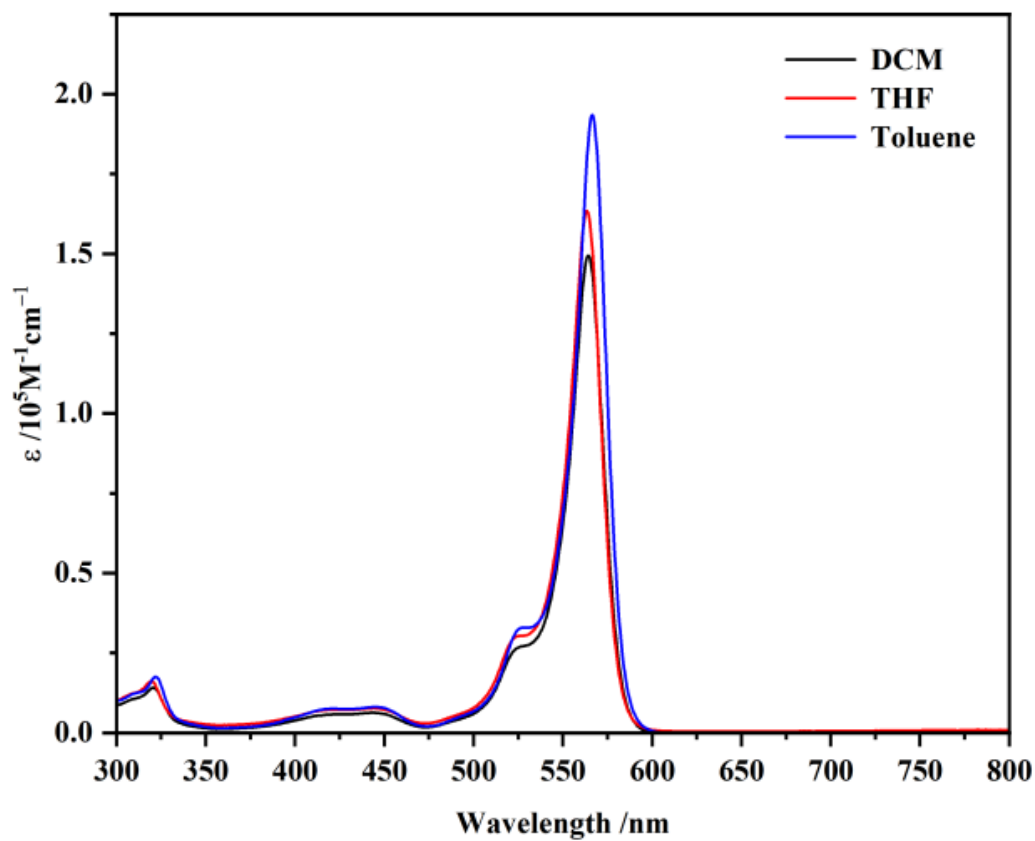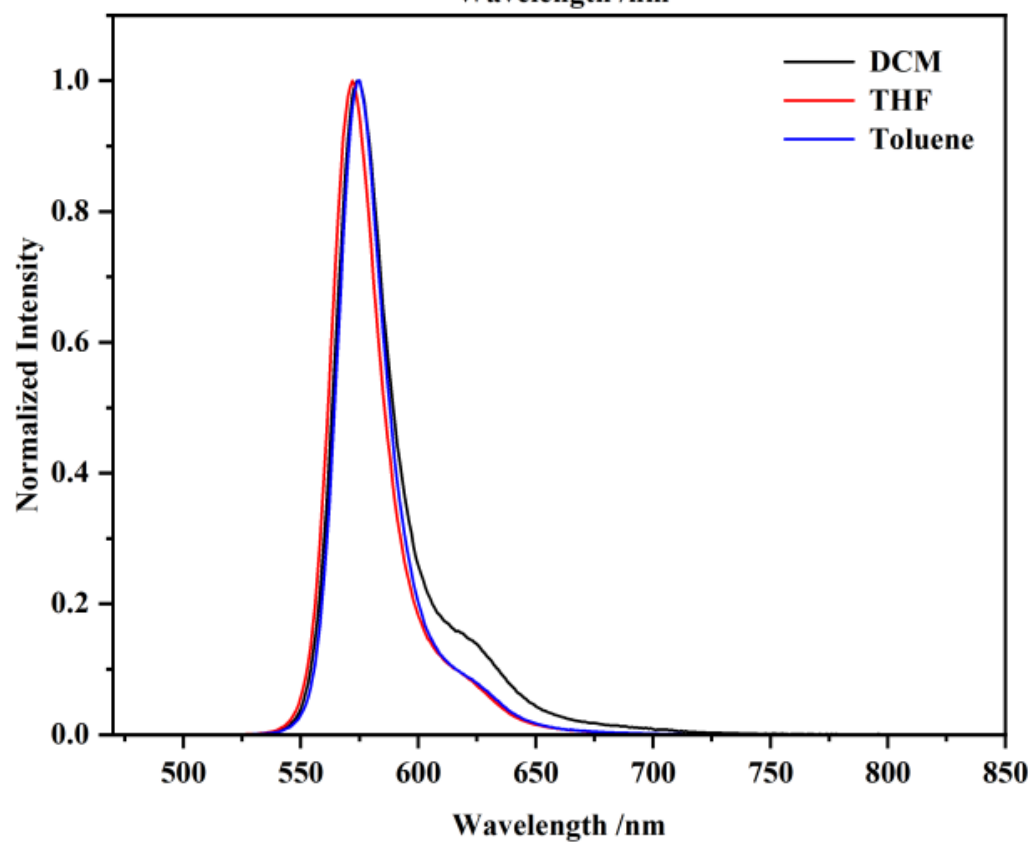

**Figure S16.** Absorption and Normalized emission spectra of **5a** recorded in DCM, THF and toluene at room temperature.

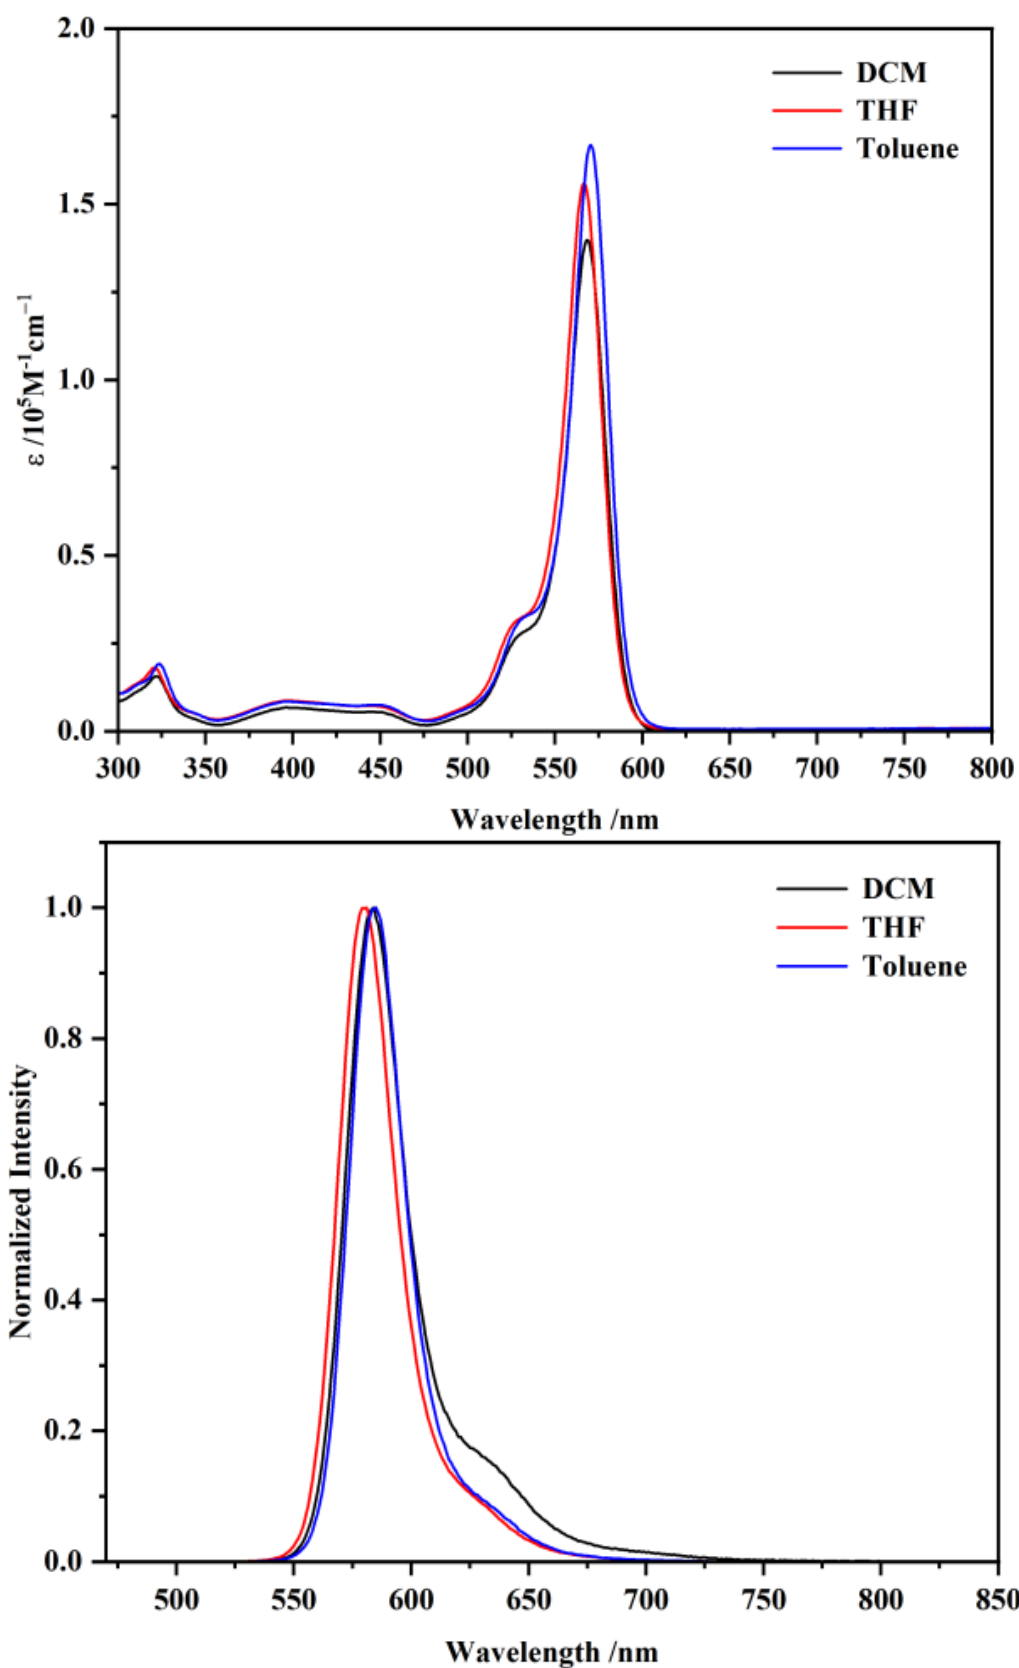

**Figure S17.** Absorption and Normalized emission spectra of **5b** recorded in DCM, THF and toluene at room temperature.

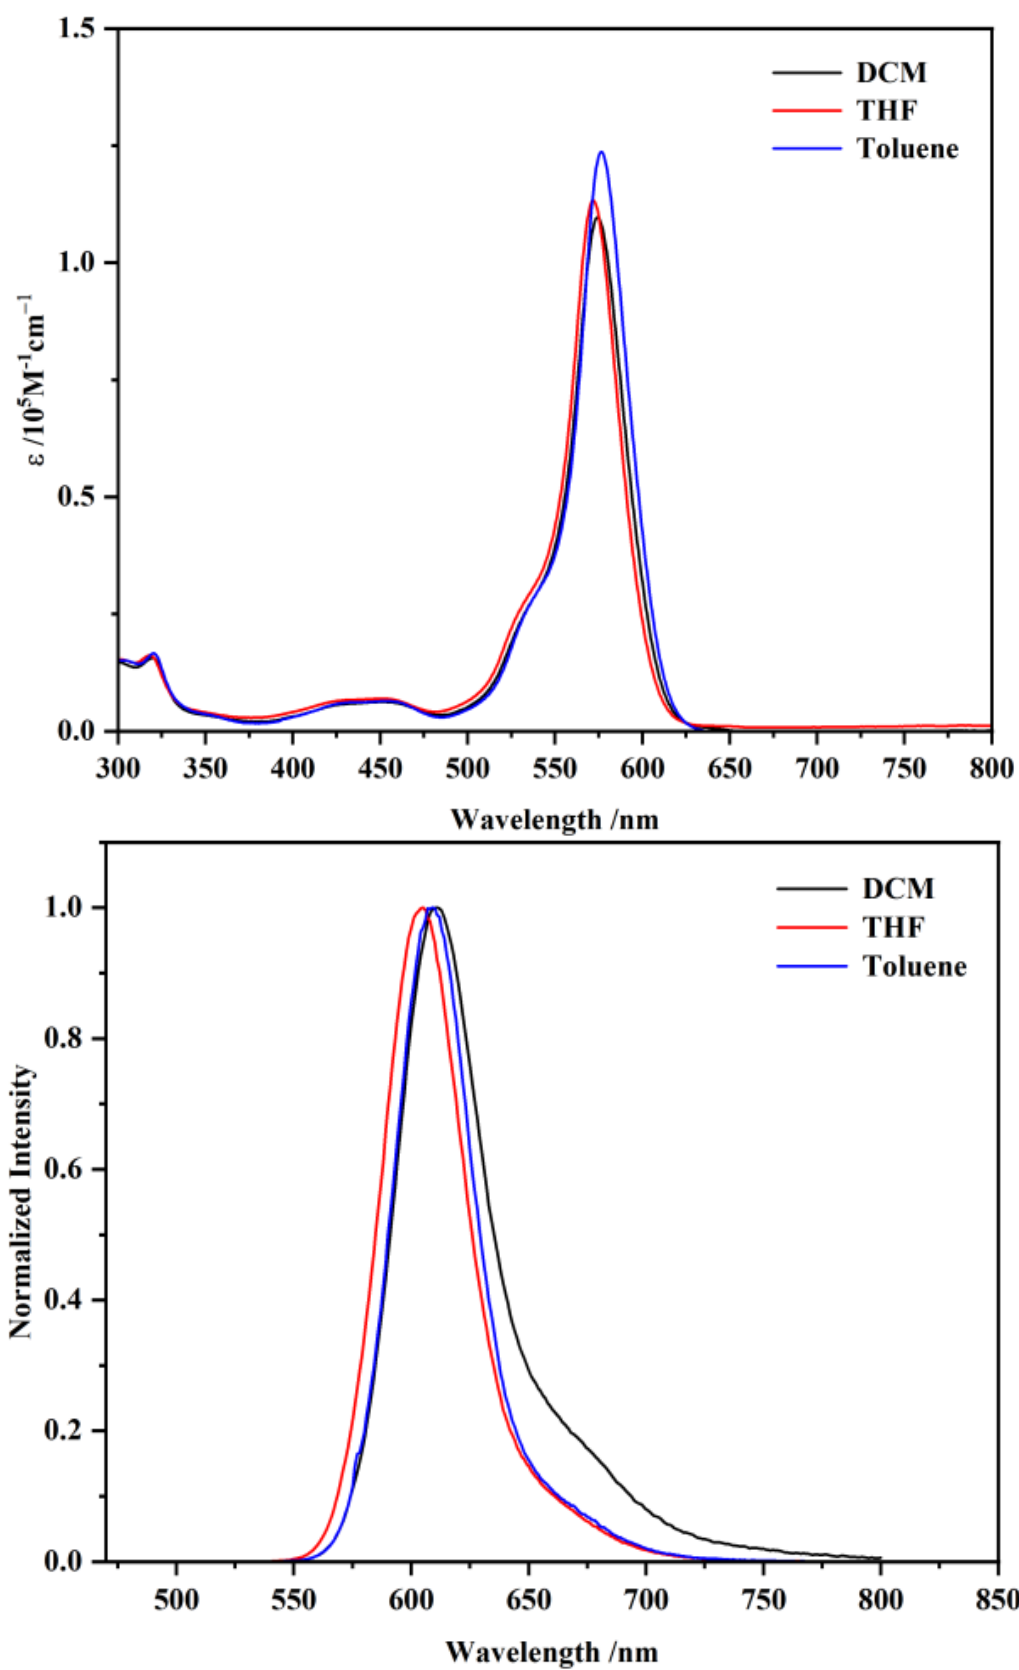

**Figure S18.** Absorption and Normalized emission spectra of **5c** recorded in DCM, THF and toluene at room temperature.



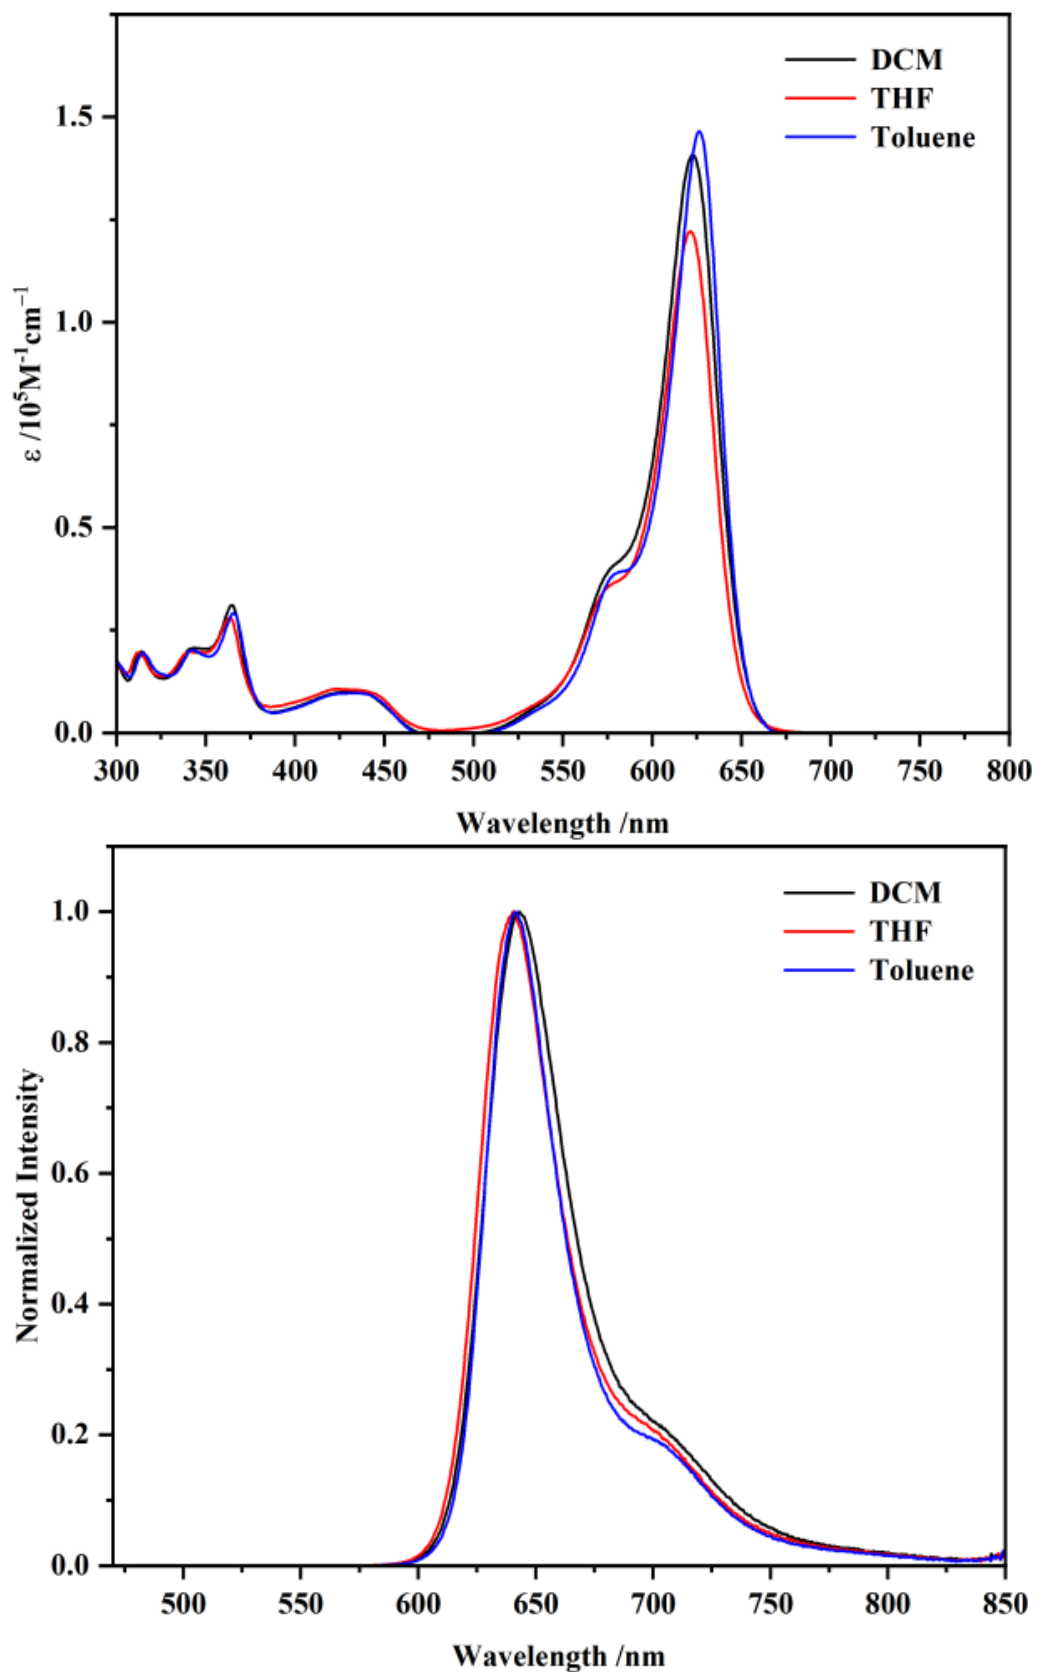

**Figure S19.** Absorption and Normalized emission spectra of **8a** recorded in DCM, THF and toluene at room temperature.

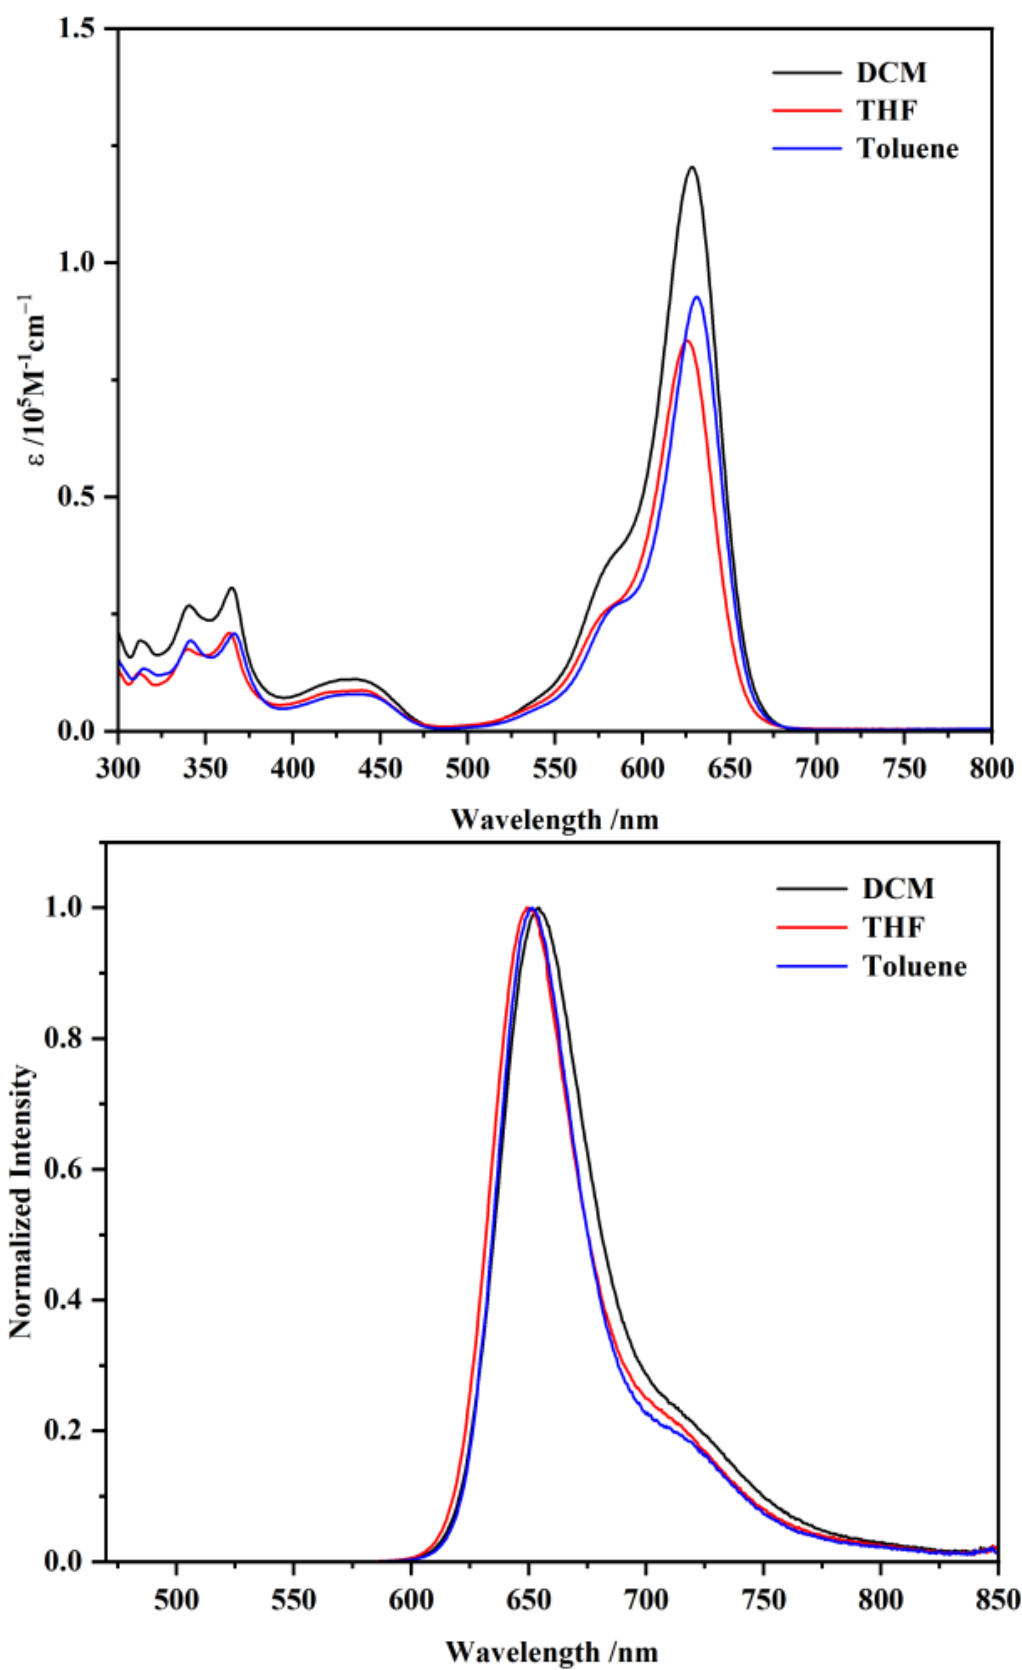

**Figure S20.** Absorption and Normalized emission spectra of **8b** recorded in DCM, THF and toluene at room temperature.

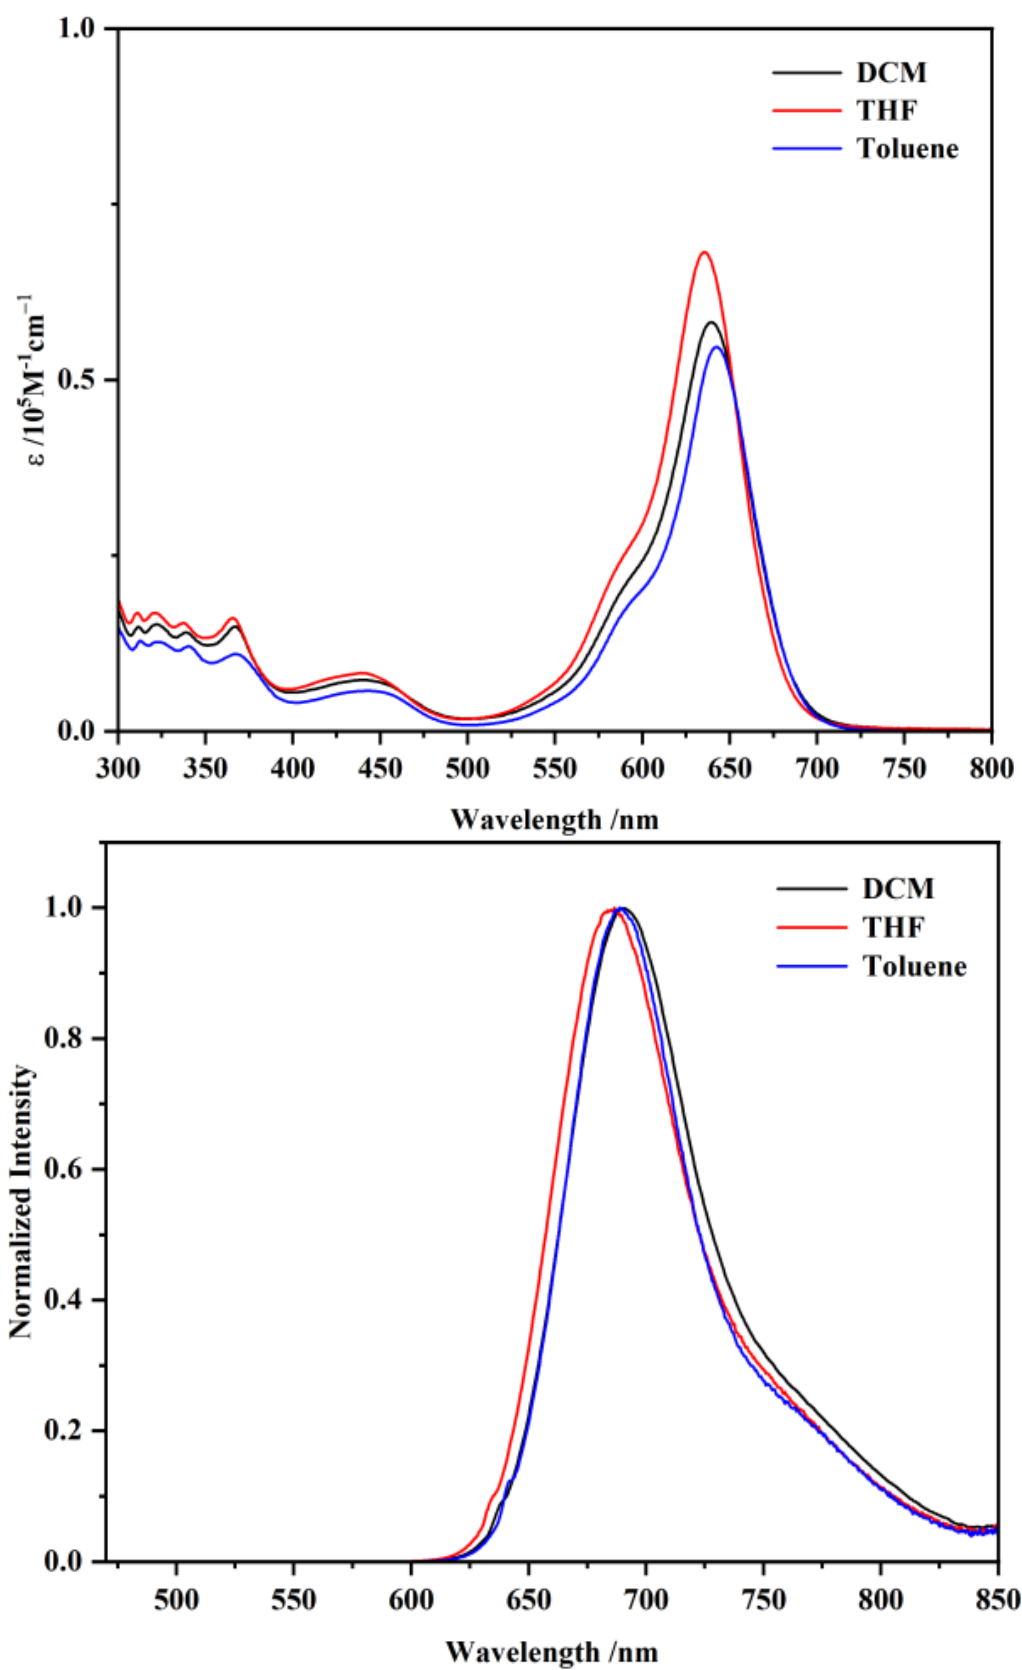

**Figure S21.** Absorption and Normalized emission spectra of **8c** recorded in DCM, THF and toluene at room temperature.

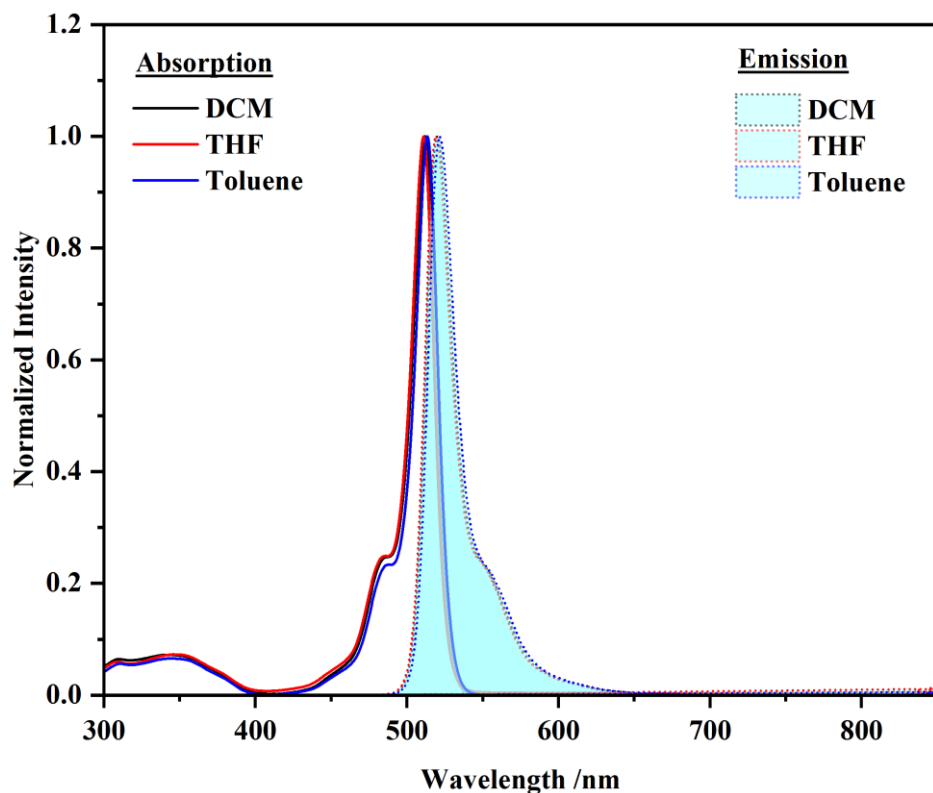

**Figure S22.** Normalized absorption and emission spectra of **1a** recorded in DCM, THF and toluene at room temperature.

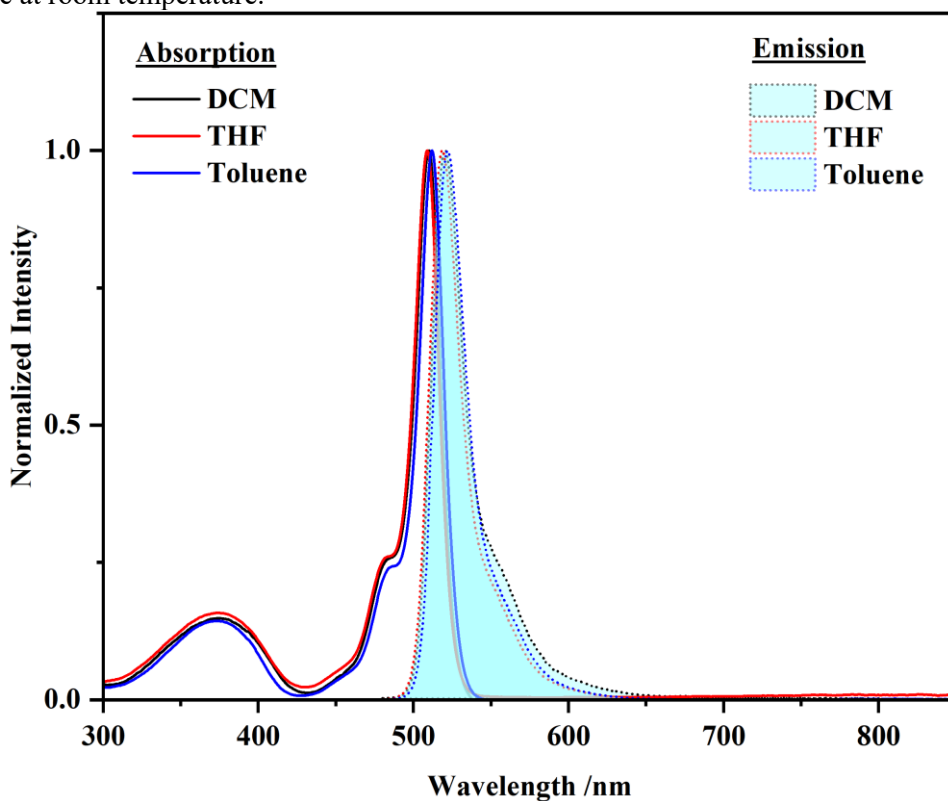

**Figure S23.** Normalized absorption and emission spectra of **1b** recorded in DCM, THF and toluene at room temperature.

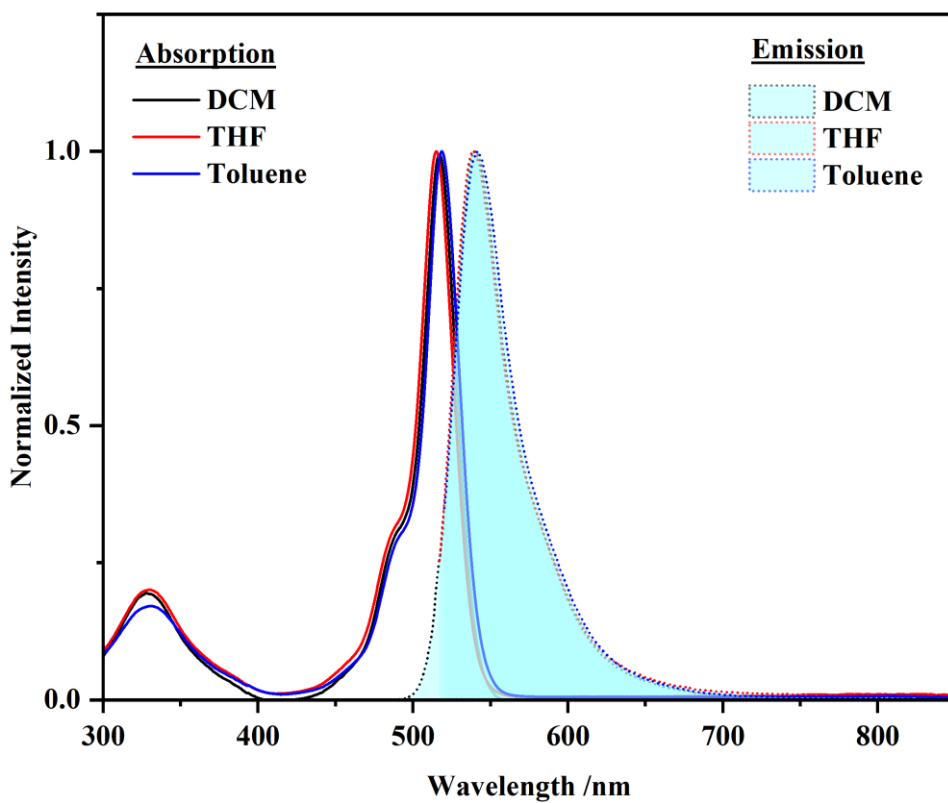

**Figure S24.** Normalized absorption and emission spectra of **1c** recorded in DCM, THF and toluene at room temperature.

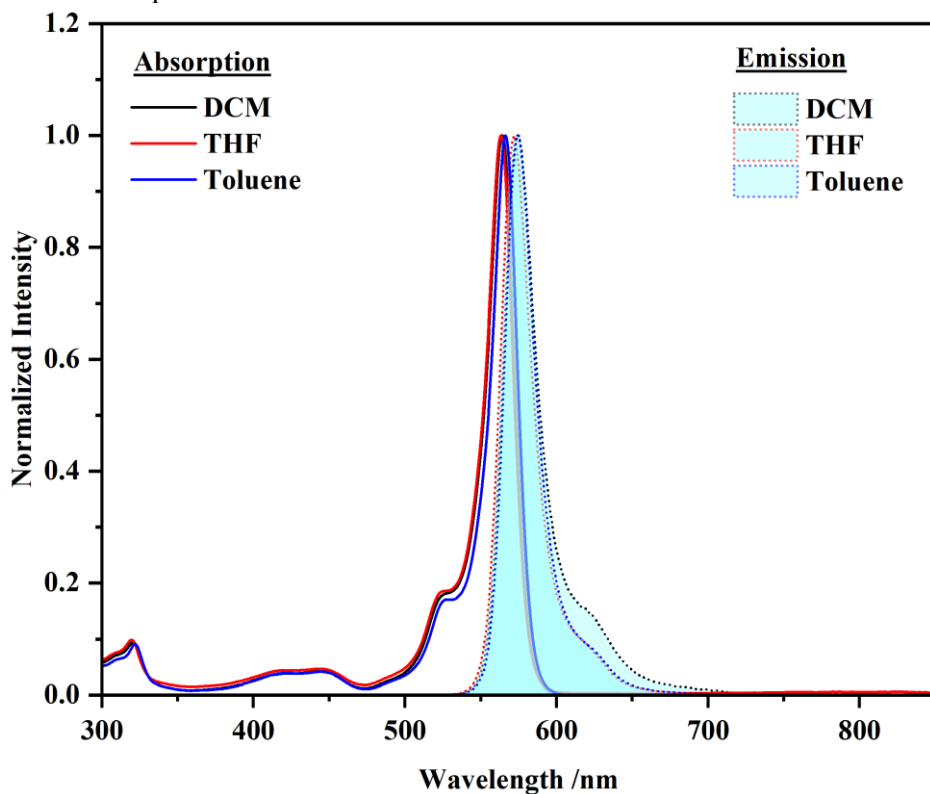

**Figure S25.** Normalized absorption and emission spectra of **5a** recorded in DCM, THF and toluene at room temperature.

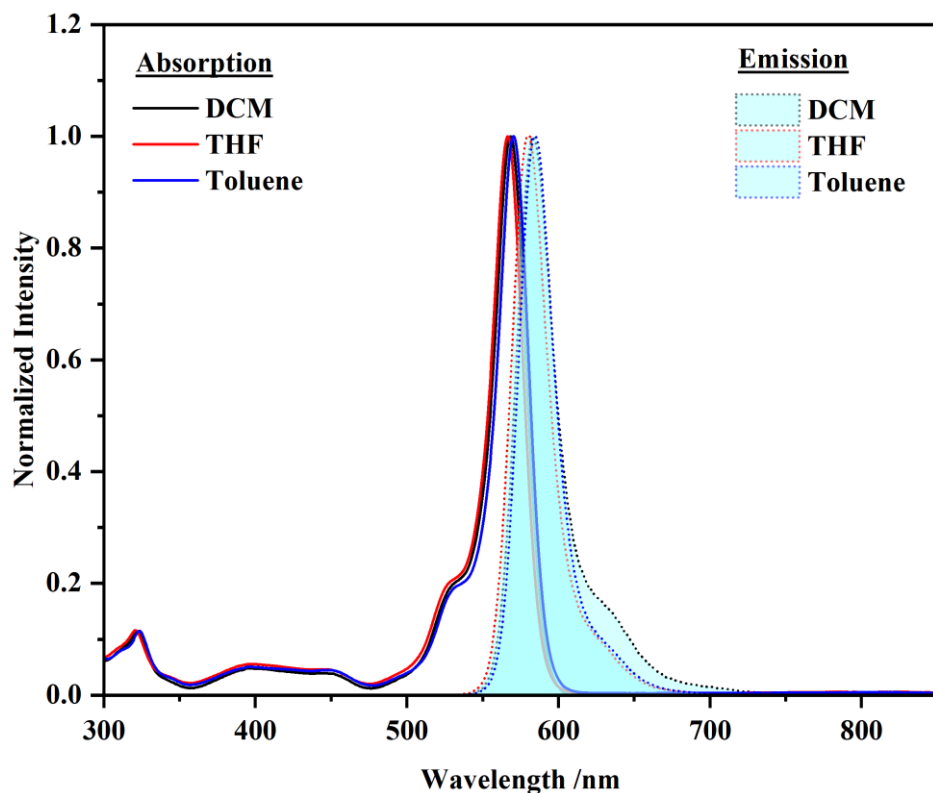

**Figure S26.** Normalized absorption and emission spectra of **5b** recorded in DCM, THF and toluene at room temperature.

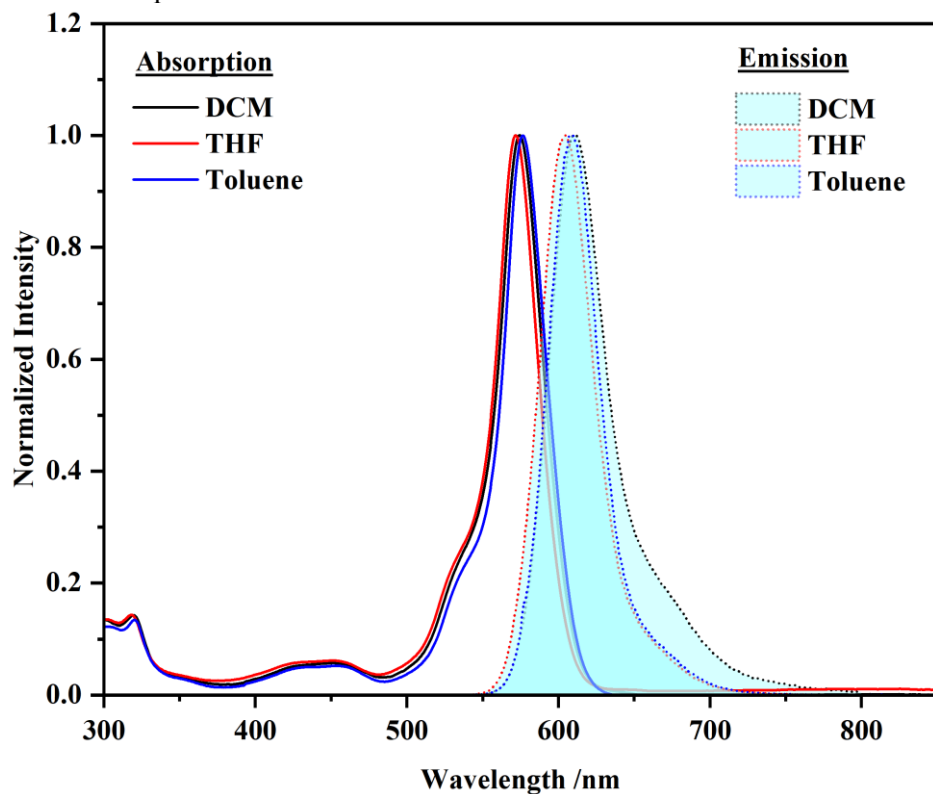

**Figure S27.** Normalized absorption and emission spectra of **5c** recorded in DCM, THF and toluene at room temperature.

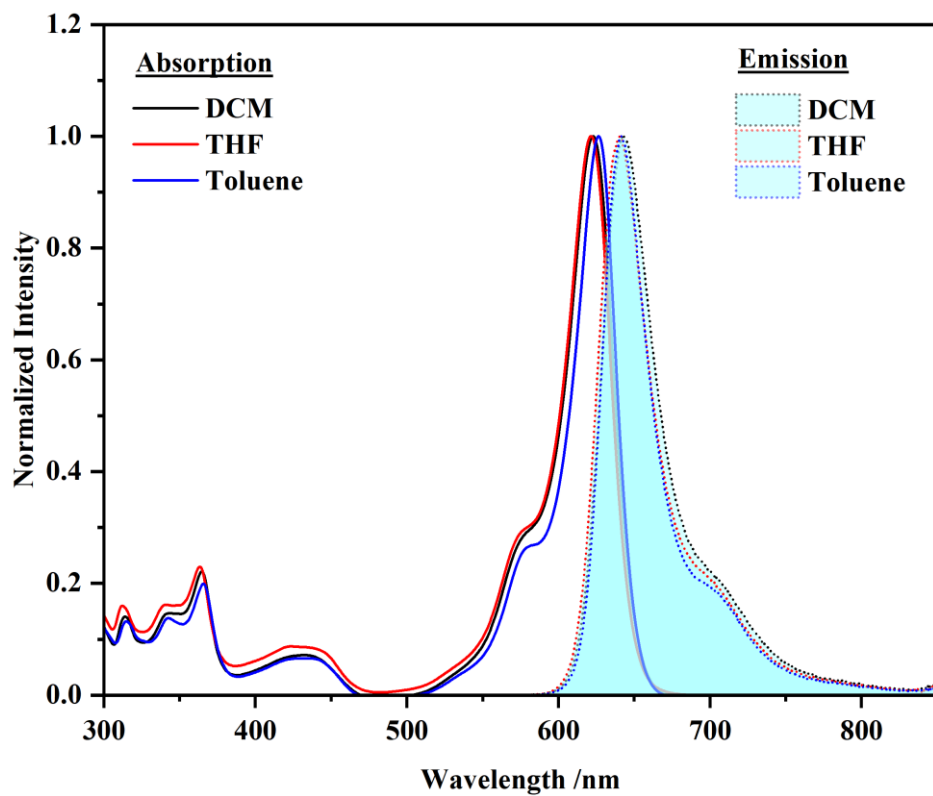

**Figure S28.** Normalized absorption and emission spectra of **8a** recorded in DCM, THF and toluene at room temperature.

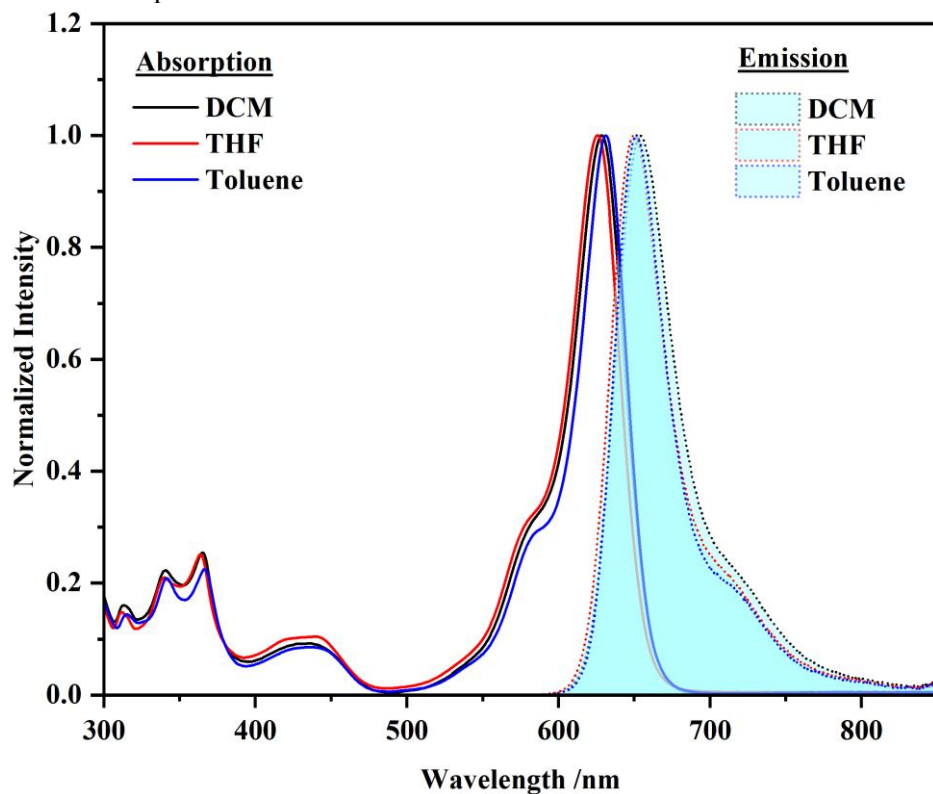

**Figure S29.** Normalized absorption and emission spectra of **8b** recorded in DCM, THF and toluene at room temperature.

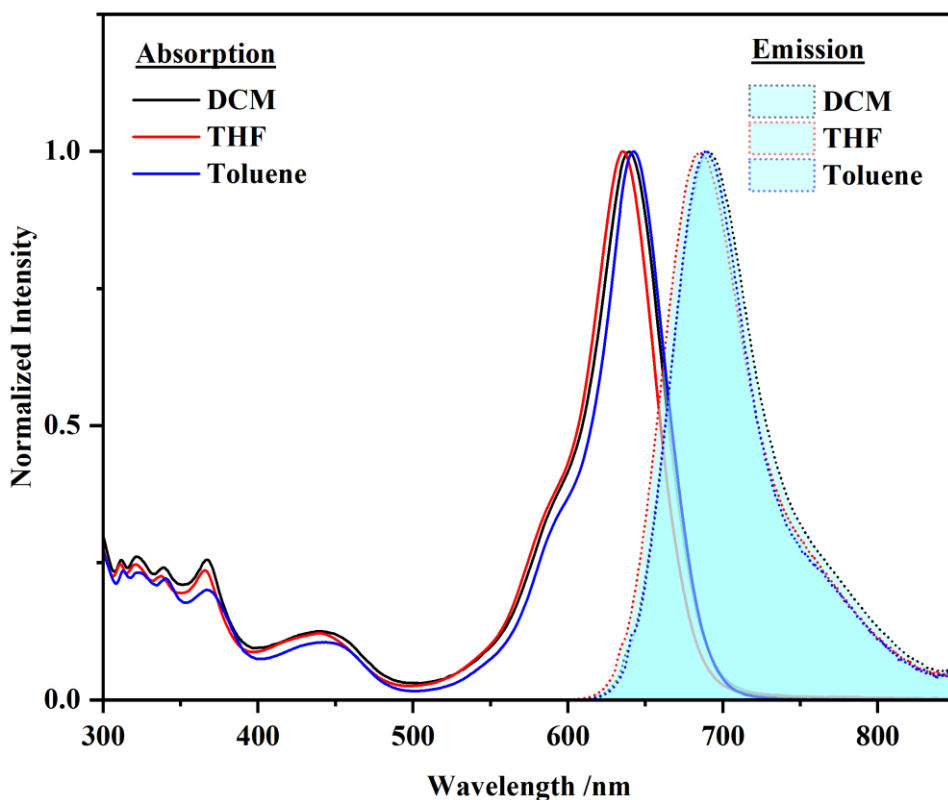

**Figure S30.** Normalized absorption and emission spectra of **8c** recorded in DCM, THF and toluene at room temperature.

| Compound  | $\lambda_{sol}^{abs}$ [nm] <sup>a</sup> | $\lambda_{sol}^{em}$ | SS                               | $\lambda_{film}^{abs}$ | $\lambda_{film}^{em}$ | SS                               | $\lambda_{film}^{abs} - \lambda_{sol}^{abs}$ | $\lambda_{film}^{em} - \lambda_{film}^{abs}$ |
|-----------|-----------------------------------------|----------------------|----------------------------------|------------------------|-----------------------|----------------------------------|----------------------------------------------|----------------------------------------------|
|           | ( $\epsilon^{\max}$ ) <sup>b</sup>      | [nm] <sup>c</sup>    | [cm <sup>-1</sup> ] <sup>d</sup> | [nm] <sup>e</sup>      | [nm] <sup>f</sup>     | [cm <sup>-1</sup> ] <sup>g</sup> | [nm]                                         | [nm]                                         |
| <b>5a</b> | 564(1.49)                               | 574                  | 309                              | 595                    | 611                   | 440                              | 31                                           | 37                                           |
| <b>5b</b> | 569(1.40)                               | 583                  | 422                              | 594                    | 626                   | 861                              | 25                                           | 43                                           |
| <b>5c</b> | 575(1.10)                               | 611                  | 1025                             | 667                    | 718                   | 1065                             | 92                                           | 107                                          |
| <b>8a</b> | 623(1.41)                               | 643                  | 499                              | 661                    | 743                   | 1670                             | 38                                           | 100                                          |
| <b>8b</b> | 629(1.20)                               | 654                  | 608                              | 701                    | 749                   | 914                              | 72                                           | 95                                           |
| <b>8c</b> | 640(0.58)                               | 690                  | 1132                             | 721                    | 770                   | 883                              | 81                                           | 80                                           |

**Table S8.** <sup>a</sup> Absorption maxima measured in dilute CH<sub>2</sub>Cl<sub>2</sub> ( $1.0 \times 10^{-5}$  M). <sup>b</sup> Molar absorption coefficients for the most intense absorption band. ( $\times 10^5$ , M<sup>-1</sup> cm<sup>-1</sup>). <sup>c</sup> Emission maxima measured in dilute CH<sub>2</sub>Cl<sub>2</sub> solution ( $1.0 \times 10^{-6}$  M), excited at  $\lambda_{sol}^{abs}$ . <sup>d</sup> Stokes shift in dilute CH<sub>2</sub>Cl<sub>2</sub>. <sup>e</sup> Absorption maxima measured in thin films (spin-coated on quartz substrates). <sup>f</sup> Emission maxima measured in thin films (spin-coated on quartz substrates), excited at  $\lambda_{film}^{abs}$ . <sup>g</sup> Stokes shift in thin films.



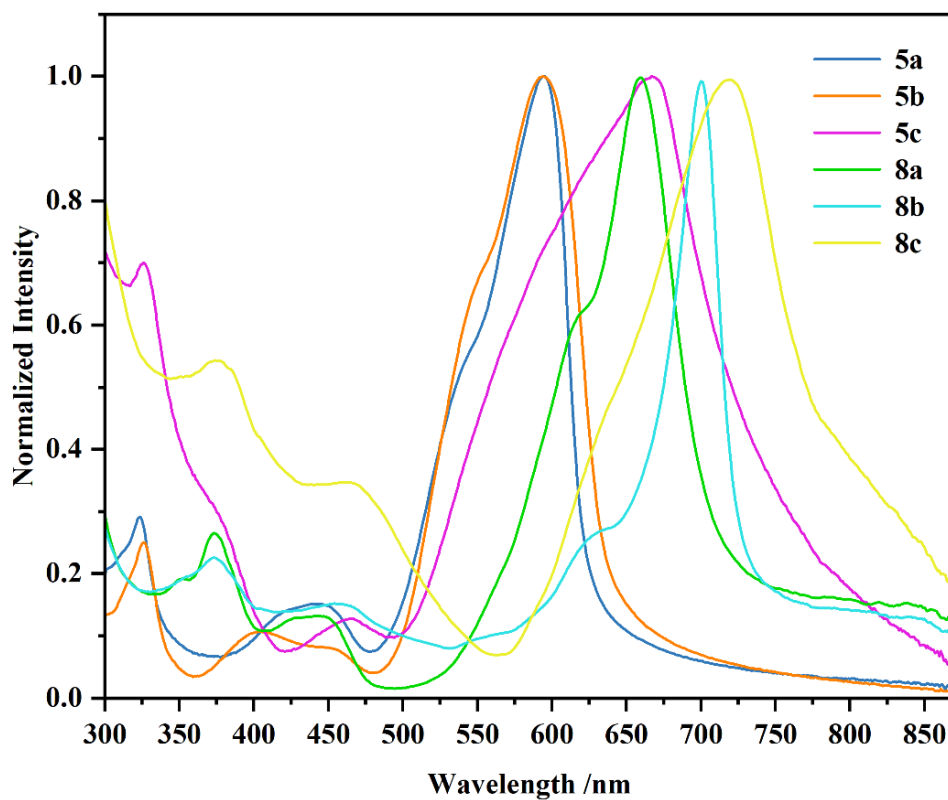

Figure S31. The solid (film) states absorption spectra of compound 5a-c and 8a-c.

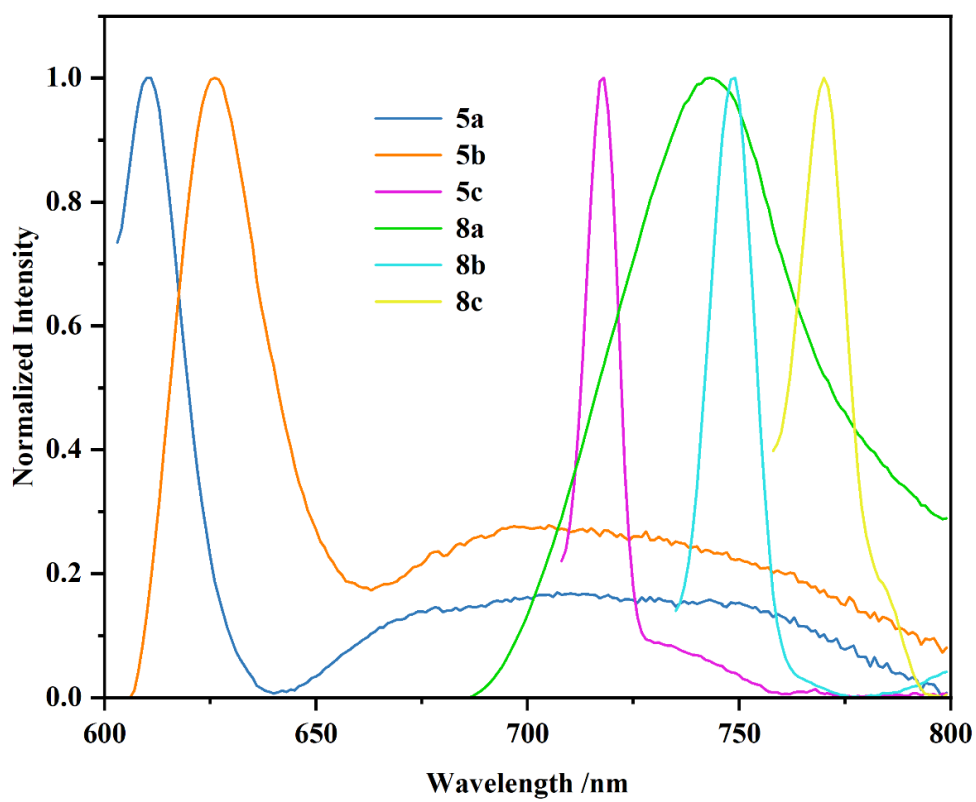

Figure S32. The solid (film) states absorption spectra of compound 5a-c and 8a-c.

## 5. Electrochemical Data

| Dyes      | $E_{red}^{onset}$<br>(V) | $E_{ox}^{onset}$<br>(V) | LUMO<br>(eV) | HOMO<br>(eV) | $E_g^e$<br>(eV) | $E_g^o$<br>(eV) |
|-----------|--------------------------|-------------------------|--------------|--------------|-----------------|-----------------|
| <b>1a</b> | -1.49                    | 0.80                    | -3.31        | -5.60        | 2.29            | 2.35            |
| <b>5a</b> | -1.51                    | 0.53                    | -3.29        | -5.33        | 2.04            | 2.13            |
| <b>8a</b> | -1.45                    | 0.38                    | -3.35        | -5.18        | 1.83            | 1.91            |
| <b>1b</b> | -1.44                    | 0.76                    | -3.36        | -5.56        | 2.20            | 2.36            |
| <b>5b</b> | -1.43                    | 0.51                    | -3.37        | -5.31        | 1.94            | 2.10            |
| <b>8b</b> | -1.38                    | 0.32                    | -3.42        | -5.12        | 1.70            | 1.88            |
| <b>1c</b> | -1.28                    | 0.84                    | -3.52        | -5.64        | 2.12            | 2.30            |
| <b>5c</b> | -1.32                    | 0.58                    | -3.48        | -5.38        | 1.90            | 2.04            |
| <b>8c</b> | -1.21                    | 0.41                    | -3.59        | -5.21        | 1.62            | 1.81            |

**Table S9.**  $E_{red}^{onset}$  = the onset reduction potentials;  $E_{ox}^{onset}$  = the onset oxidation potentials; LUMO =  $-(E_{red}^{onset}+4.8)$ ; HOMO =  $-(E_{ox}^{onset}+4.8)$ ;  $E_g^e$  = LUMO – HOMO;  $E_g^e$  = bandgap, obtained from the intercept of the electrochemical data;  $\lambda_{onset}$  = the onset of absorption in CH<sub>2</sub>Cl<sub>2</sub> solution of **1a-c**, **5a-c** and **8a-c**;  $E_g^o = 1240/\lambda_{onset}$ ;  $E_g^o$  = bandgap, obtained from the intercept of the absorption spectra.

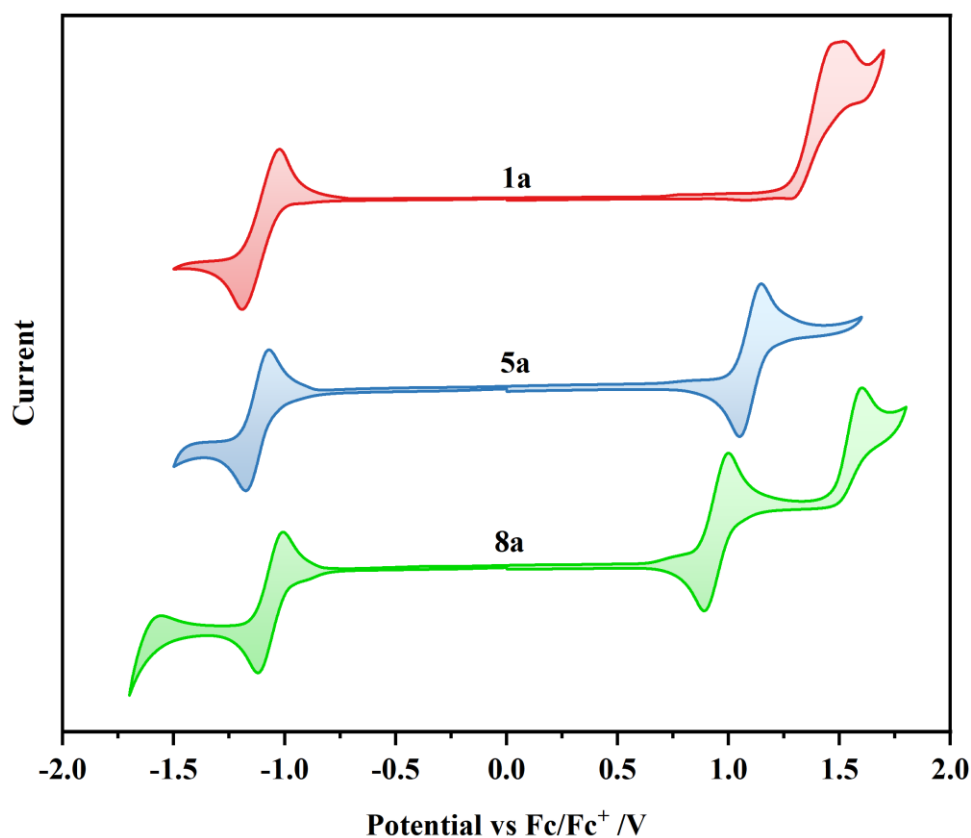

**Figure S33.** Cyclic voltammograms of 1 mM **1a**, **5a** and **8a** in dichloromethane.

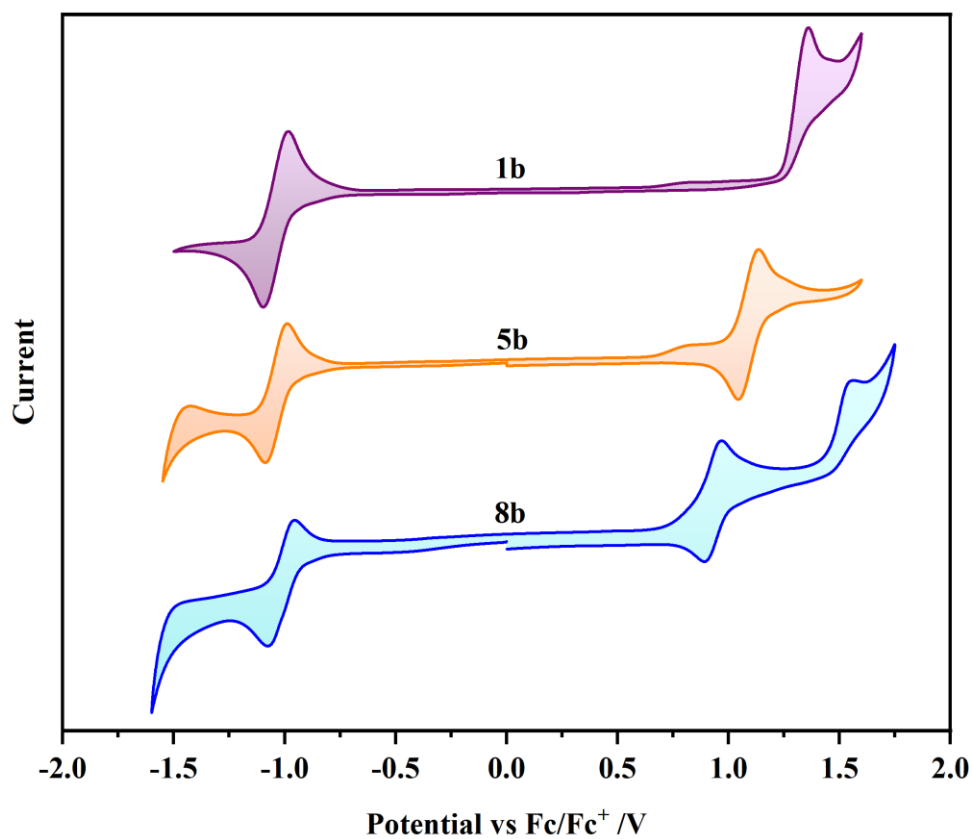

Figure S34. Cyclic voltammograms of 1 mM **1b**, **5b** and **8b** in dichloromethane.

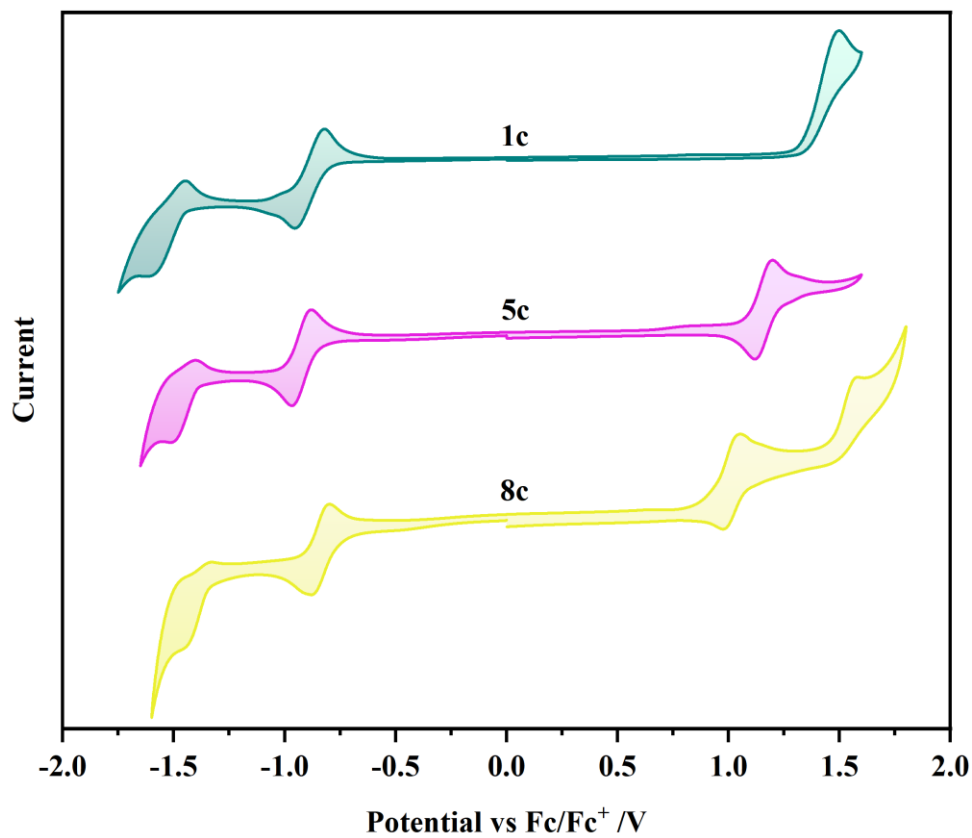

Figure S35. Cyclic voltammograms of 1 mM **1c**, **5c** and **8c** in dichloromethane.

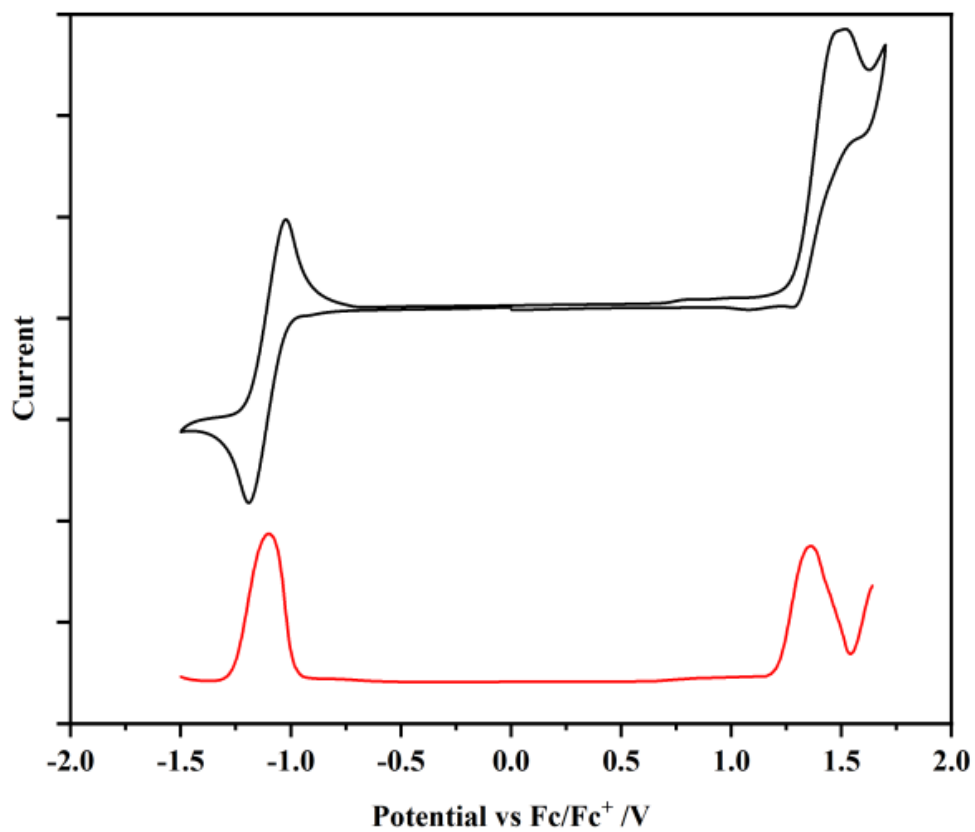

Figure S36. CV( black ) and DPV( red ) of 1 mM **1a** in dichloromethane.

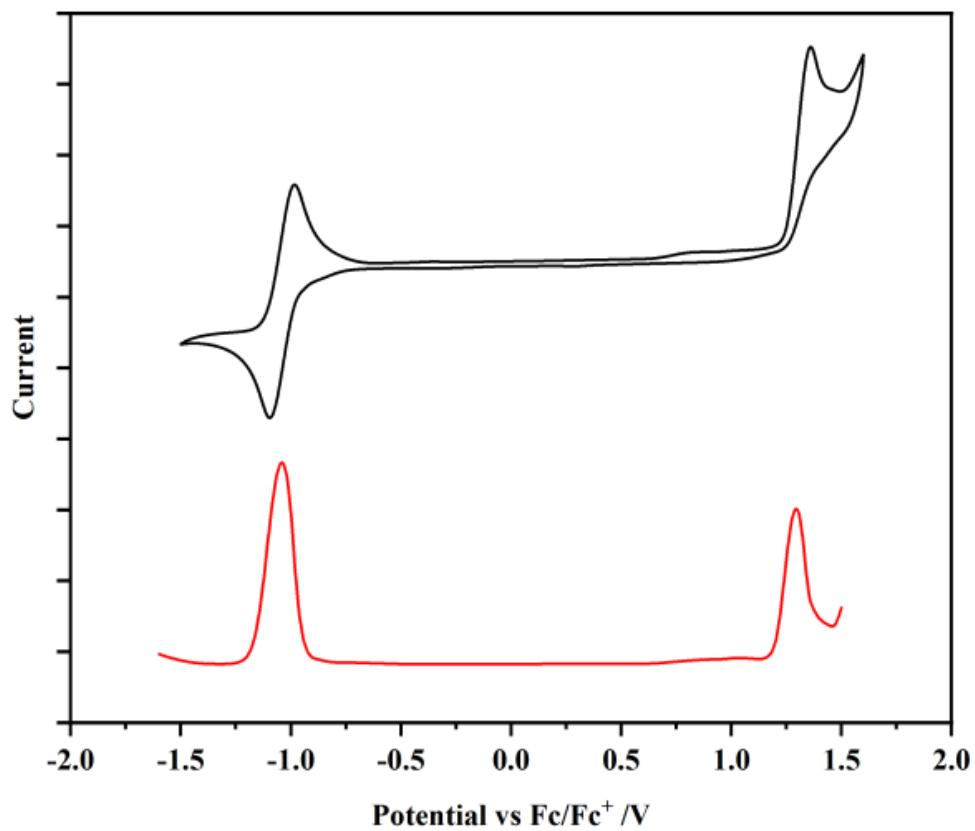

Figure S37. CV( black ) and DPV( red ) of 1 mM **1b** in dichloromethane.

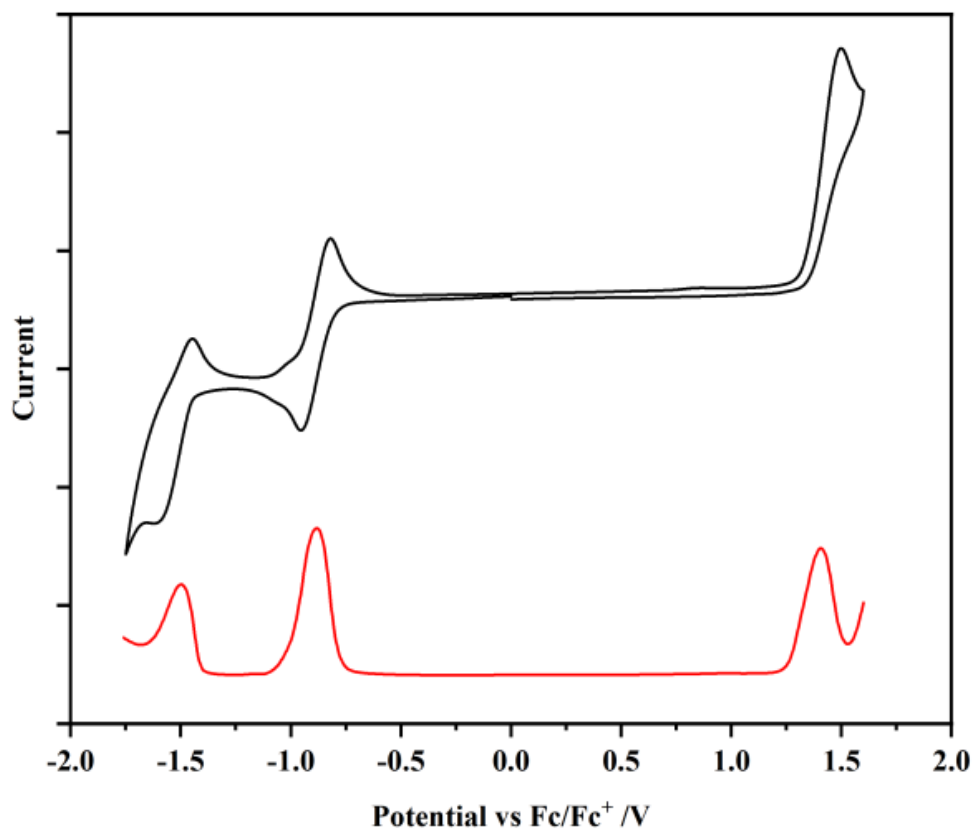

Figure S38. CV( black ) and DPV( red ) of 1 mM **1c** in dichloromethane.

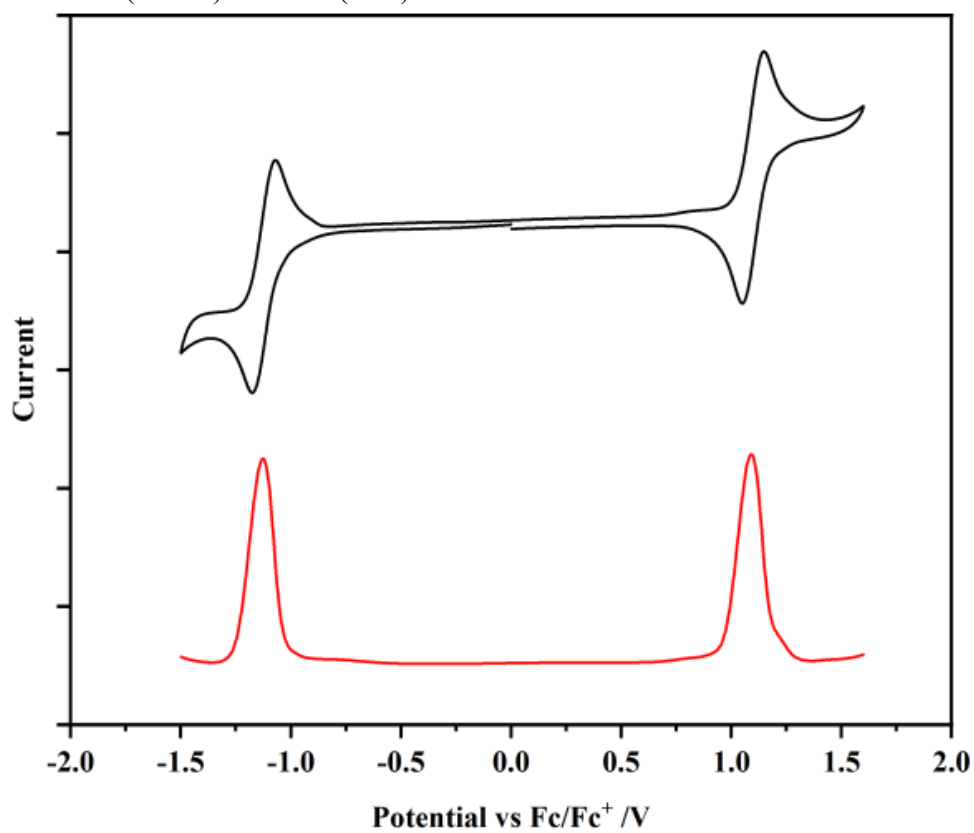

Figure S39. CV( black ) and DPV( red ) of 1 mM **5a** in dichloromethane.

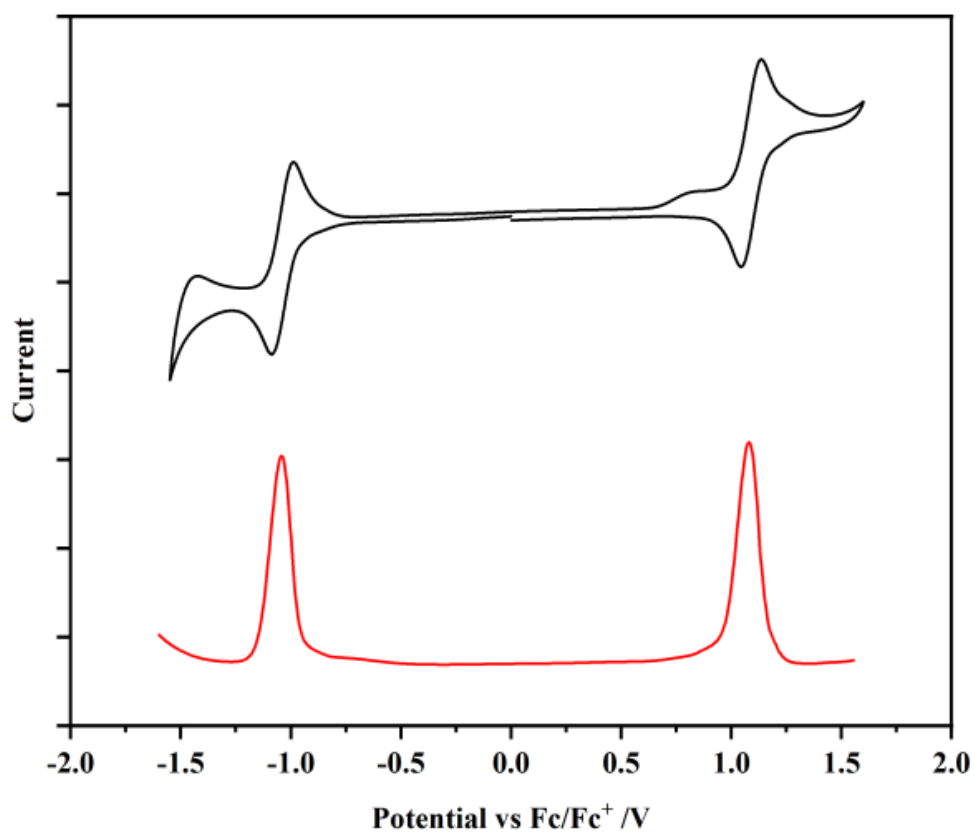

**Figure S40.** CV( black ) and DPV( red ) of 1 mM **5b** in dichloromethane.

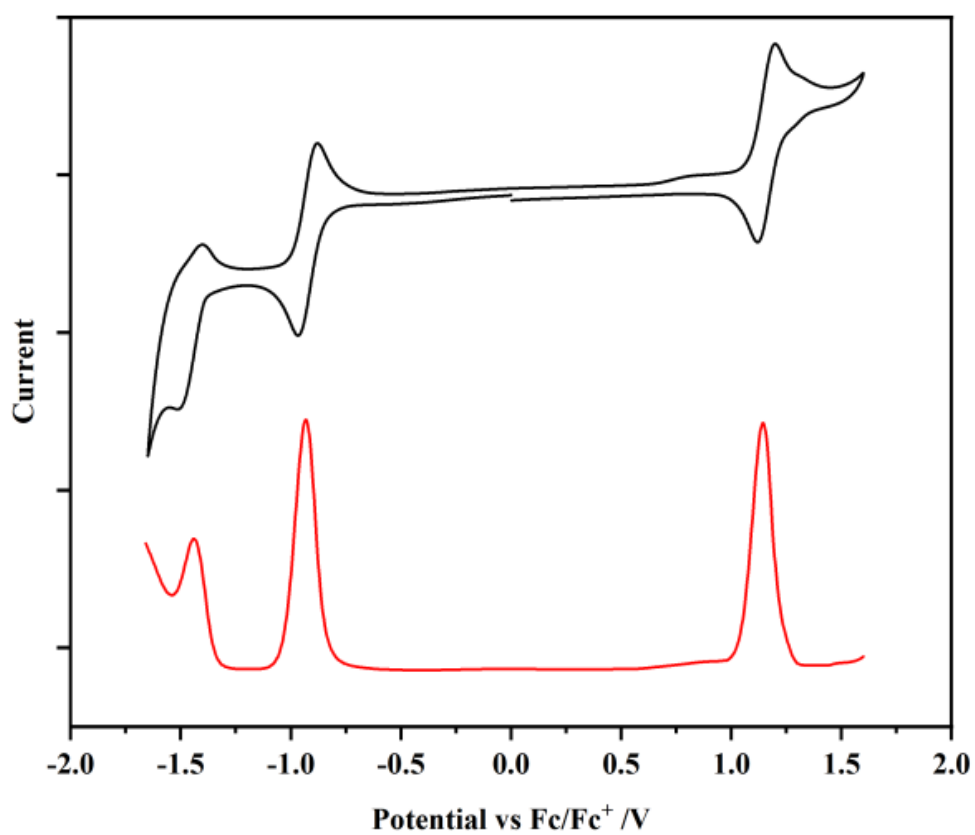

**Figure S41.** CV( black ) and DPV( red ) of 1 mM **5c** in dichloromethane.

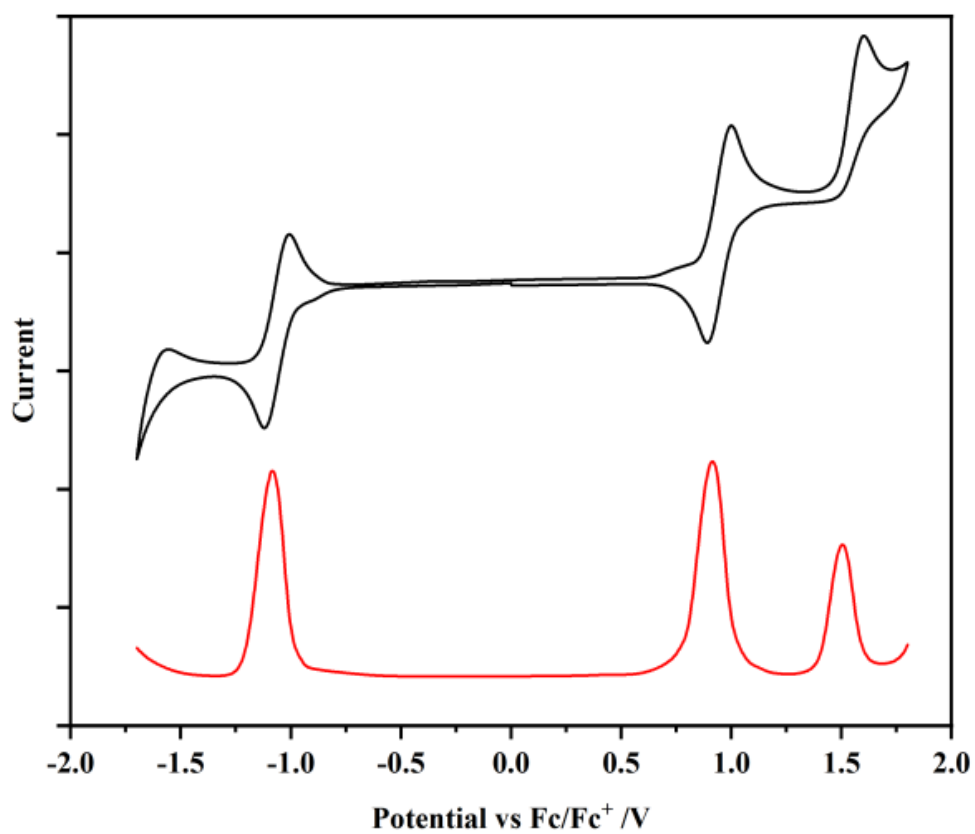

**Figure S42.** CV( black ) and DPV( red ) of 1 mM **8a** in dichloromethane.

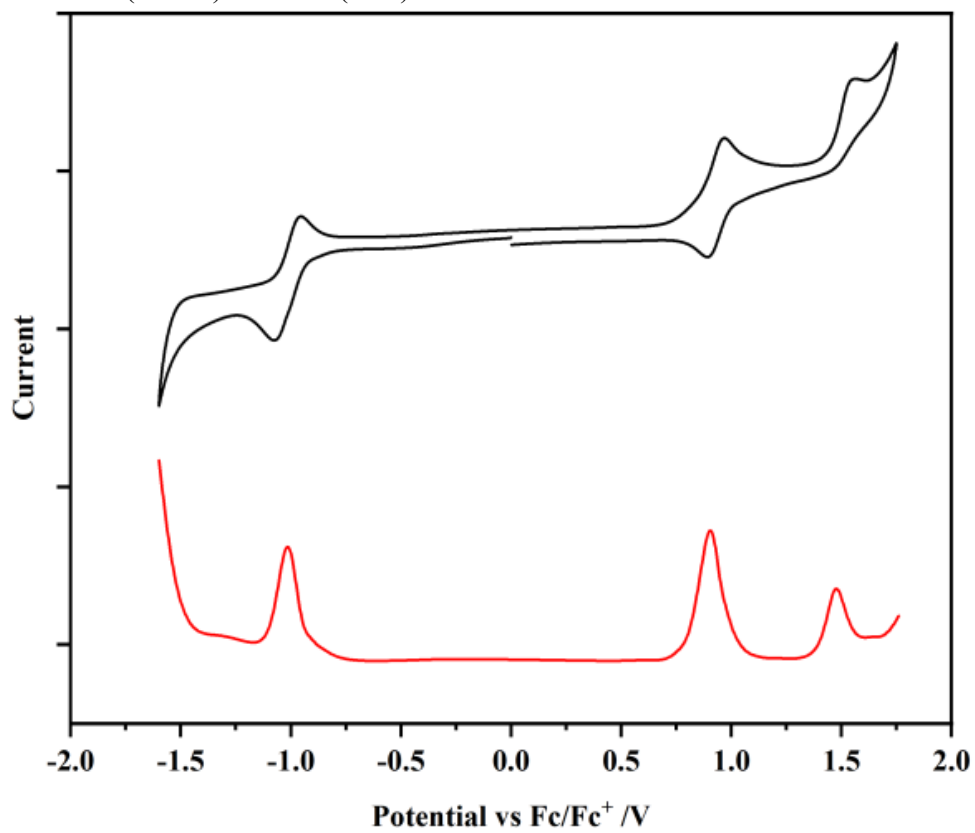

**Figure S43.** CV( black ) and DPV( red ) of 1 mM **8b** in dichloromethane.

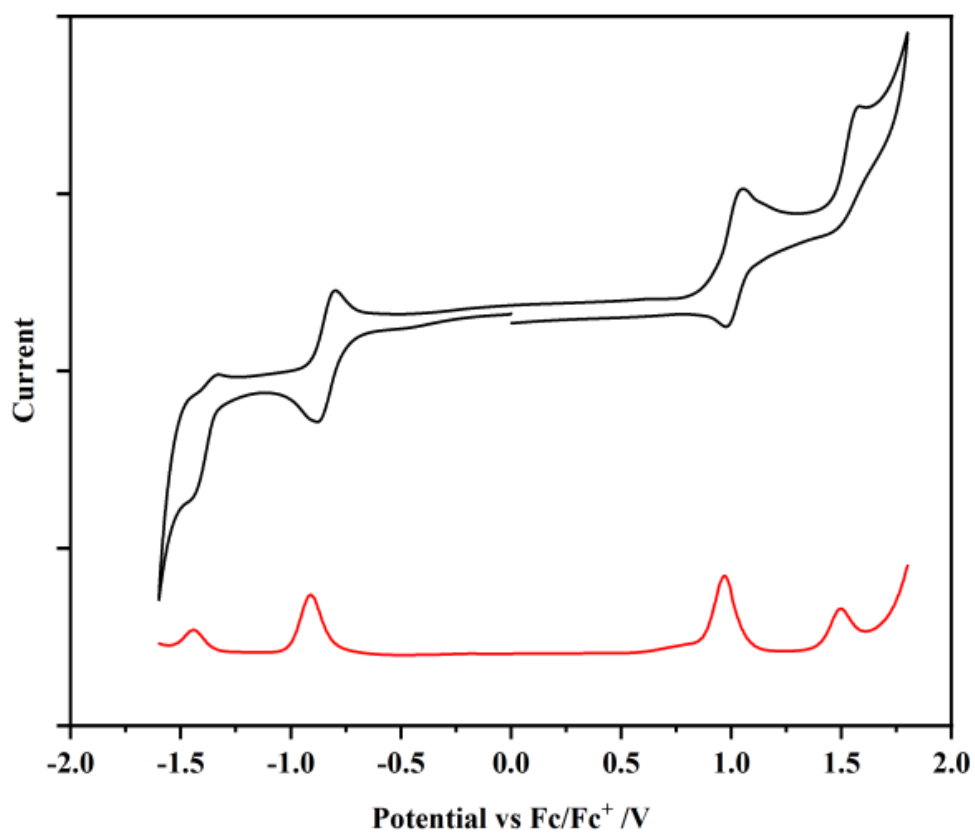

**Figure S44.** CV( black ) and DPV( red ) of 1 mM **8c** in dichloromethane.



## 6. DFT Calculations

Kohn-Sham density functional theory (DFT) has been employed to optimize the ground state geometries of the investigated complexes at the TPSSh<sup>[8, 9]</sup>/6-311+G(d, p) level. All the optimized geometries were tested to be local minima by frequency calculations at the same level. To get insight into the photophysical properties of the reported complexes, time-dependent density functional theory (TD-DFT) calculations using the TPSSh functional in conjunction with the 6-311+G(d, p) basis set have been performed. Several exchange correlation functionals were tested. It is found the TPSSh functional with 10% “exact” Hartree-Fock exchange component is an appropriate choice for the current calculations.

NICS(0) values were also calculated at the TPSSh/6-311+G(d, p) level. The effect of the solvent was considered in all the calculations utilizing the integral equation formalism polarized continuum model (IEF-PCM<sup>[10, 11]</sup>) with the dichloromethane as solvent. All the quantum chemical calculations were performed using the Gaussian 16 software suit<sup>[12]</sup>.

According to the hole-electron analysis method, the “hole” and “electron” denote where the excited electron leaves and goes, respectively. In many cases, any excitation can be identified as a definitive distribution of hole and electron. The theory proved to be a useful and powerful method in unraveling nature of electron excitations<sup>[13]</sup>. The wavefunction analysis was calculated by means of the Multiwfn version 3.8(dev)<sup>[14, 15]</sup> code and plotted using VMD<sup>[16]</sup> software.

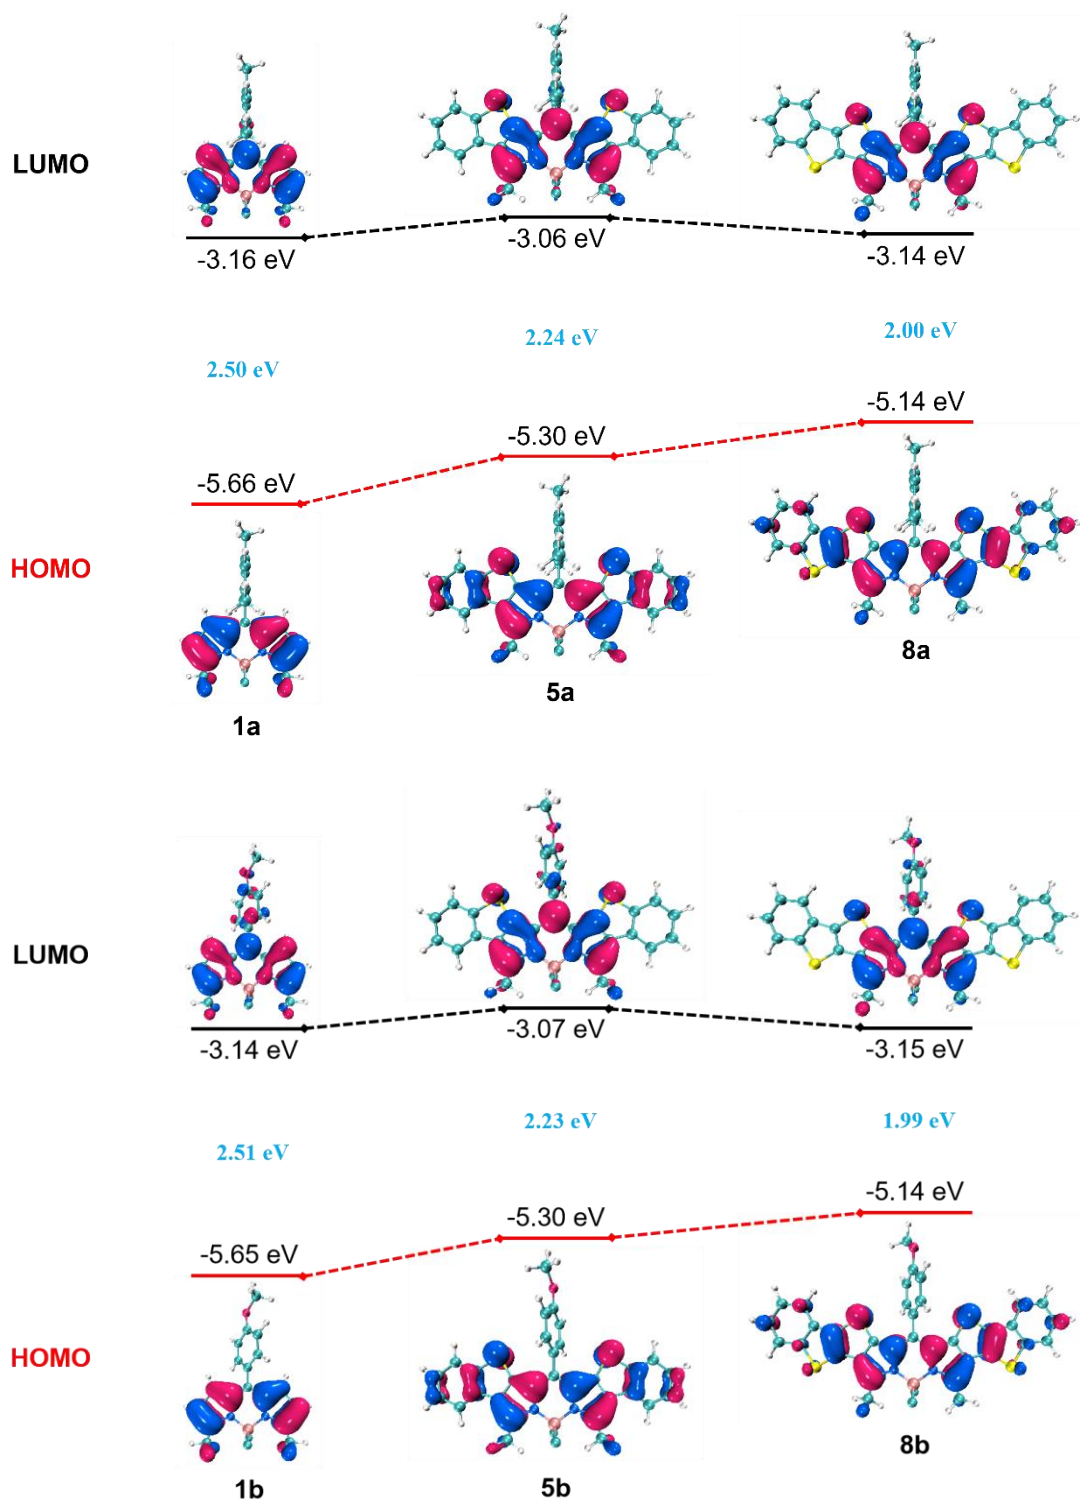

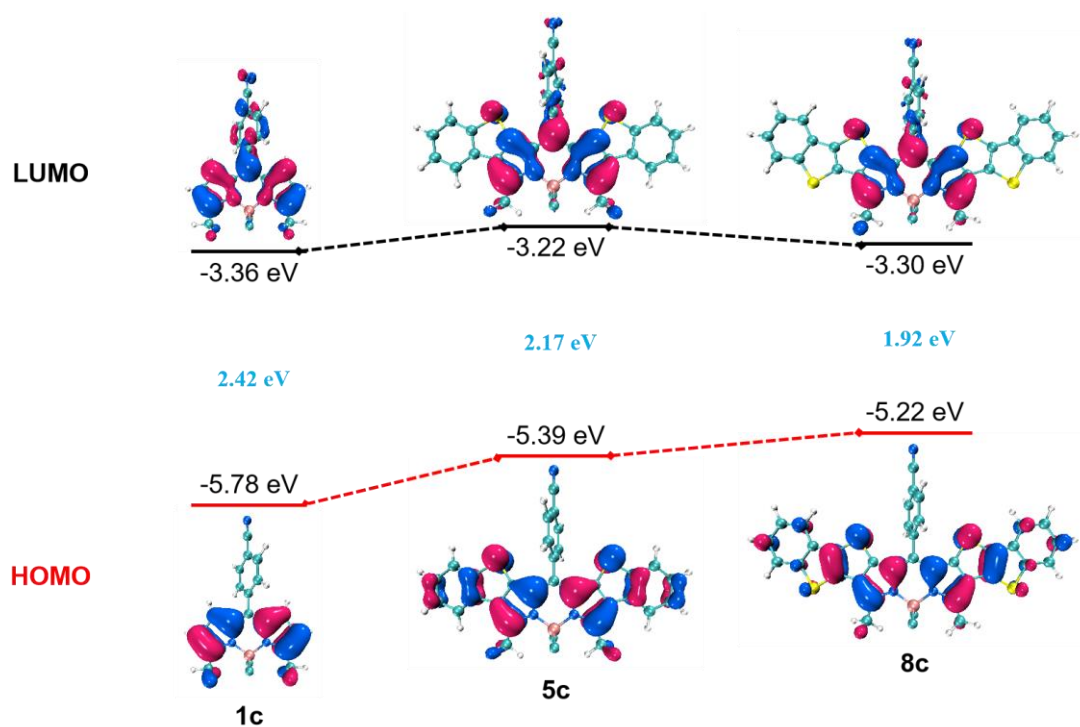

**Figure S45.** Pictorial presentation of LUMO, HOMO and their energy levels for **1a-c**, **5a-c** and **8a-c**.

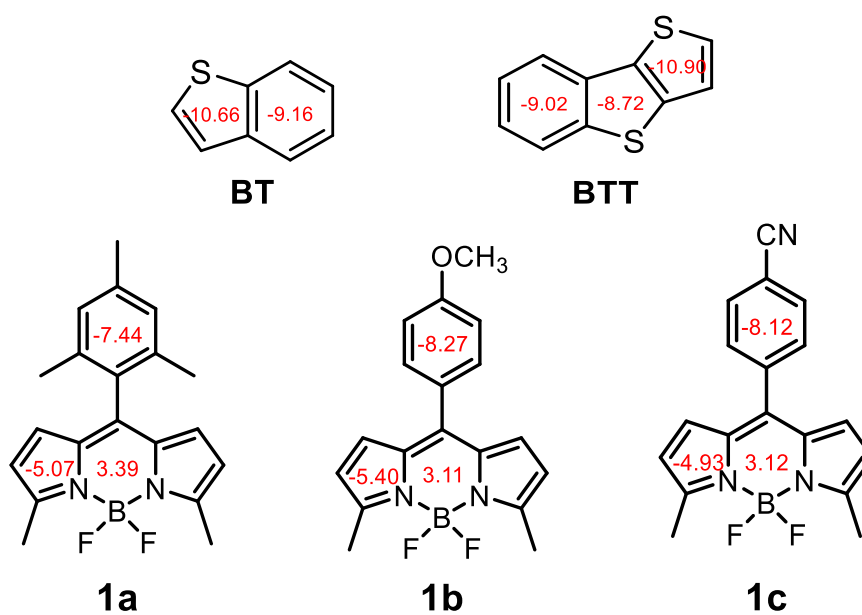

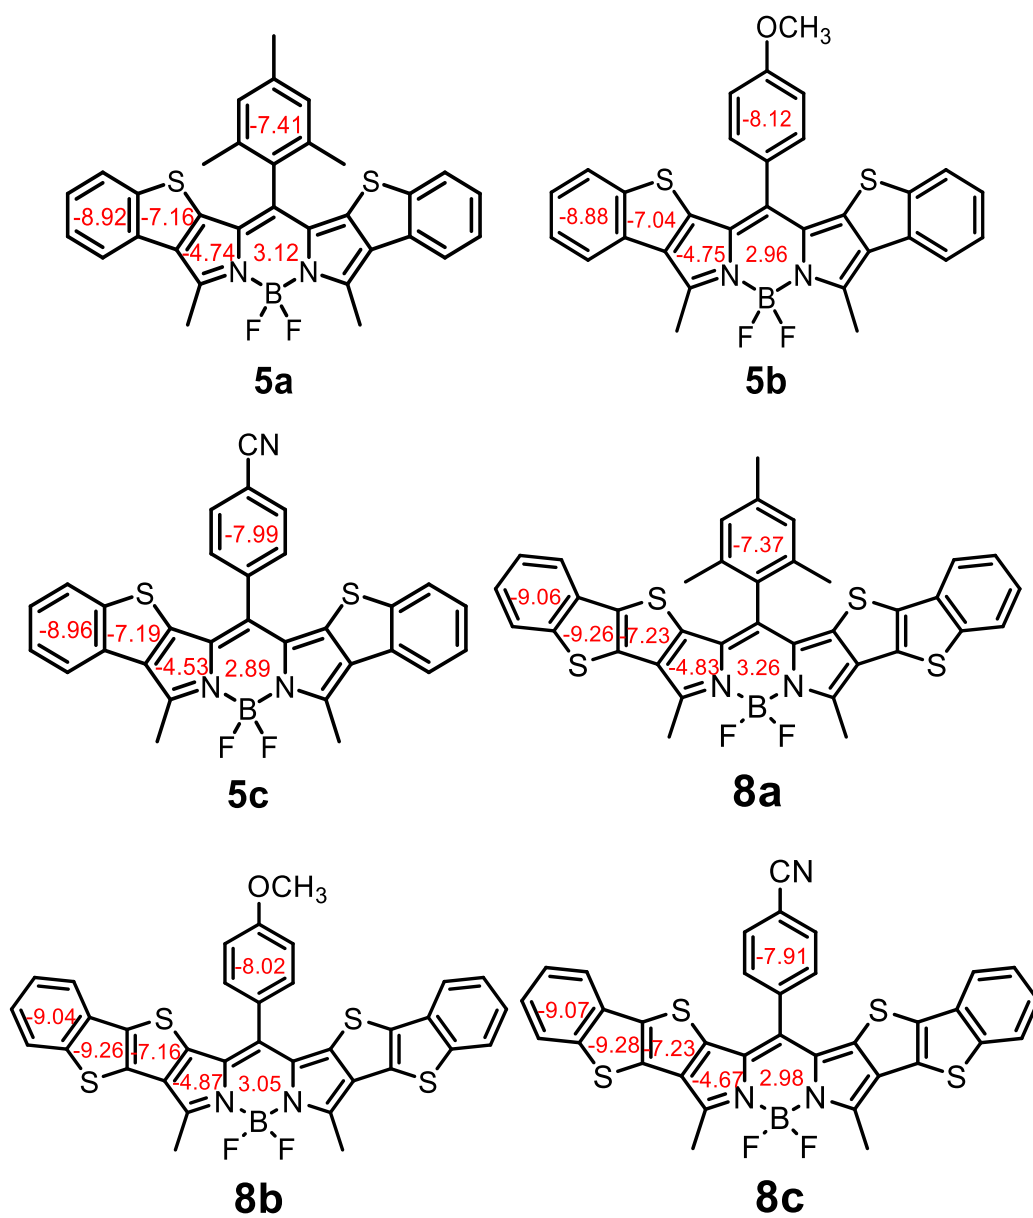

Figure S46. NICS(0) values of rings in **1a-c**, **5a-c**, **8a-c**, BT and BTT.

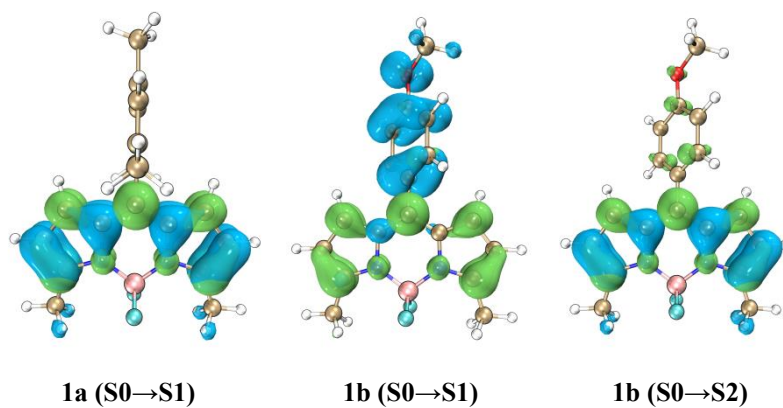

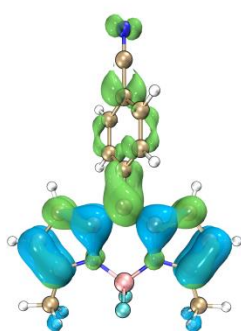

**1c (S0→S1)**

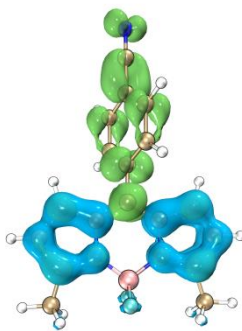

**1c (S0→S3)**

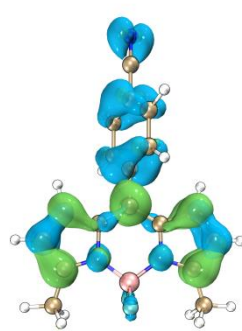

**1c (S0→S5)**

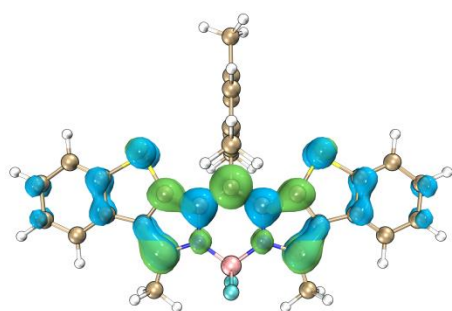

**5a (S0→S1)**

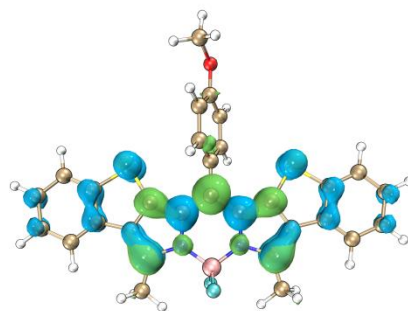

**5b (S0→S1)**

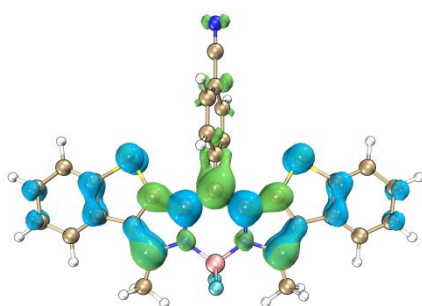

**5c (S0→S1)**

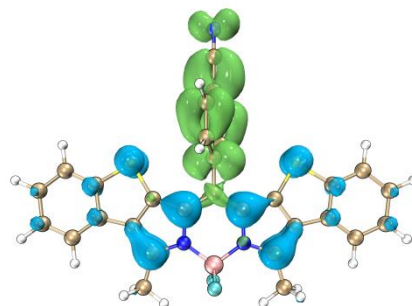

**5c (S0→S4)**

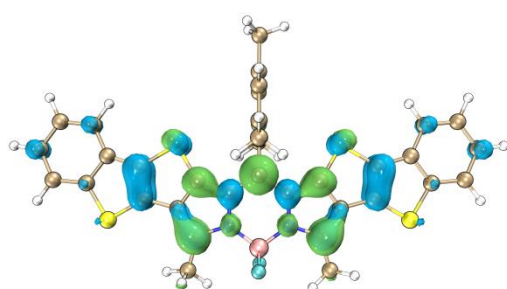

**8a (S0→S1)**

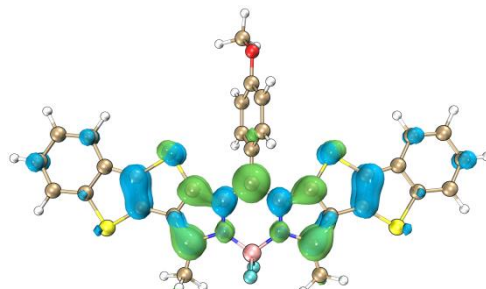

**8b (S0→S1)**

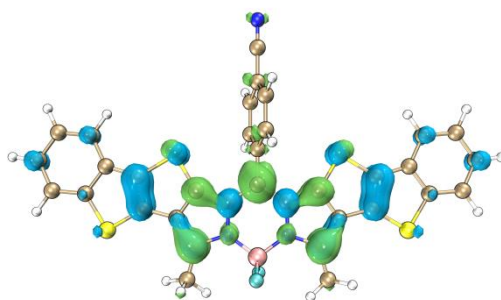

**8c (S<sub>0</sub>→S<sub>1</sub>)**

**Figure S47.** Real space representation of hole and electron distributions of complexes **1a-c**, **5a-c** and **8a-c** (isovalue = 0.002). Green and blue regions denote the electron and hole distributions, respectively.

| Complexes | S <sub>n</sub> | λ <sub>max</sub> (nm) | E <sub>ex</sub> (eV) | <i>f</i> | Major Contributions |
|-----------|----------------|-----------------------|----------------------|----------|---------------------|
| <b>1a</b> | S <sub>1</sub> | 435.89                | 2.8444               | 0.52210  | H → L 96.9%         |
| <b>5a</b> | S <sub>1</sub> | 509.74                | 2.4323               | 0.95800  | H → L 97.1%         |
| <b>8a</b> | S <sub>1</sub> | 594.02                | 2.0872               | 0.73540  | H → L 95.5%         |
| <b>1b</b> | S <sub>1</sub> | 443.39                | 2.7963               | 0.25480  | H-1 → L 97.2%       |
|           | S <sub>2</sub> | 438.31                | 2.8287               | 0.49920  | H → L 95.1%         |
| <b>5b</b> | S <sub>1</sub> | 516.19                | 2.4019               | 0.93750  | H → L 97.5%         |
| <b>8b</b> | S <sub>1</sub> | 602.27                | 2.0586               | 0.71670  | H → L 95.9%         |
|           | S <sub>1</sub> | 454.89                | 2.7256               | 0.43590  | H → L 95.0%         |
| <b>1c</b> |                |                       |                      |          | H → L+1 55.2%       |
|           | S <sub>3</sub> | 359.54                | 3.4484               | 0.18660  | H-1 → L 38.2%       |
|           |                |                       |                      |          | H → L 6.3%          |
|           | S <sub>5</sub> | 340.13                | 3.6452               | 0.27680  | H-3 → L 92.1%       |
| <b>5c</b> | S <sub>1</sub> | 528.78                | 2.3447               | 0.85380  | H → L 95.7%         |
|           | S <sub>4</sub> | 426.03                | 2.9102               | 0.14040  | H → L+1 96.9%       |
| <b>8c</b> | S <sub>1</sub> | 622.72                | 1.9910               | 0.67350  | H → L 95.4%         |

**Table S10.** The excited state properties of complexes **1a-c**, **5a-c** and **8a-c** calculated at the IEF-PCM(dichloromethane)-TPSSH/6-311+G(d, p) level.

Cartesian coordinates: (IEF-PCM-TPSSH/6-311+G(d, p))

46

1a

|   |           |           |           |
|---|-----------|-----------|-----------|
| C | -0.402978 | -1.211017 | -0.000124 |
| N | -1.800036 | -1.249411 | 0.000055  |
| B | -2.720609 | 0.002005  | -0.000045 |
| N | -1.798418 | 1.252253  | 0.000212  |
| C | -0.401400 | 1.212131  | 0.000030  |
| C | 0.297717  | 0.000108  | -0.000154 |
| C | 0.074139  | -2.543337 | 0.000033  |
| C | -1.037793 | -3.372938 | -0.000227 |
| C | -2.186683 | -2.548379 | -0.000066 |
| C | -2.183446 | 2.551702  | 0.000253  |
| C | -1.033536 | 3.374839  | 0.000167  |
| C | 0.077363  | 2.543855  | 0.000461  |
| C | -3.616279 | -2.975749 | -0.000102 |
| C | -3.612515 | 2.980831  | 0.000392  |
| C | 1.791740  | -0.000847 | -0.000134 |
| C | 2.489240  | -0.004495 | 1.223995  |
| C | 3.887654  | -0.009496 | 1.199219  |
| C | 4.606257  | -0.008820 | -0.000059 |
| C | 3.887676  | -0.008958 | -1.199278 |
| C | 2.489196  | -0.003946 | -1.224204 |
| C | 6.115993  | 0.017941  | 0.000151  |
| C | 1.756134  | -0.006008 | -2.545593 |
| C | 1.756129  | -0.007167 | 2.545360  |
| H | 1.115994  | -2.828375 | 0.000076  |
| H | -1.054429 | -4.453028 | -0.000375 |
| H | -1.048836 | 4.454948  | 0.000092  |
| H | 1.119572  | 2.827564  | 0.000596  |
| H | -4.137679 | -2.591048 | 0.880949  |
| H | -4.137934 | -2.590103 | -0.880588 |
| H | -3.678321 | -4.064455 | -0.000670 |
| H | -3.673223 | 4.069611  | -0.001488 |
| H | -4.135126 | 2.594681  | -0.879294 |
| H | -4.133900 | 2.597904  | 0.882238  |
| H | 4.425825  | -0.016455 | 2.143740  |
| H | 4.426066  | -0.015509 | -2.143671 |
| H | 6.520767  | -0.486197 | 0.881487  |
| H | 6.520594  | -0.464667 | -0.893092 |
| H | 6.484398  | 1.050312  | 0.013099  |
| H | 2.464392  | -0.009619 | -3.376622 |
| H | 1.111209  | -0.885379 | -2.641532 |
| H | 1.115309  | 0.875883  | -2.645919 |

|   |           |           |           |
|---|-----------|-----------|-----------|
| H | 1.114629  | 0.874227  | 2.645712  |
| H | 1.111854  | -0.887029 | 2.641194  |
| H | 2.464367  | -0.010327 | 3.376409  |
| F | -3.540889 | 0.002478  | 1.147823  |
| F | -3.540328 | 0.002595  | -1.148345 |

41

**1b**

|   |           |           |           |
|---|-----------|-----------|-----------|
| C | -0.511809 | 1.195796  | 0.084444  |
| N | -1.904448 | 1.278966  | 0.016690  |
| B | -2.866424 | 0.063488  | -0.038449 |
| N | -1.990714 | -1.216598 | -0.042738 |
| C | -0.594136 | -1.232240 | -0.025546 |
| C | 0.152247  | -0.043114 | 0.050408  |
| C | -0.004107 | 2.509389  | 0.228331  |
| C | -1.092677 | 3.371230  | 0.227245  |
| C | -2.258416 | 2.586180  | 0.100579  |
| C | -2.430437 | -2.495564 | -0.151382 |
| C | -1.317575 | -3.361410 | -0.208953 |
| C | -0.172792 | -2.578776 | -0.141166 |
| C | -3.675456 | 3.053408  | 0.069098  |
| C | -3.876220 | -2.860979 | -0.209589 |
| C | 1.626712  | -0.095101 | 0.094502  |
| C | 2.401913  | 0.656601  | -0.800163 |
| C | 3.794634  | 0.606274  | -0.774558 |
| C | 4.439986  | -0.196220 | 0.174772  |
| C | 3.678683  | -0.947809 | 1.083423  |
| C | 2.294527  | -0.903322 | 1.035515  |
| H | 1.038323  | 2.768757  | 0.332626  |
| H | -1.078826 | 4.447613  | 0.316715  |
| H | -1.374549 | -4.436302 | -0.299659 |
| H | 0.853051  | -2.911897 | -0.181099 |
| H | -4.172784 | 2.730603  | -0.849813 |
| H | -4.241610 | 2.638779  | 0.907933  |
| H | -3.707692 | 4.142087  | 0.125277  |
| H | -3.982617 | -3.945725 | -0.246200 |
| H | -4.411392 | -2.480448 | 0.664686  |
| H | -4.351517 | -2.429147 | -1.095072 |
| H | 4.359095  | 1.183648  | -1.495718 |
| H | 4.191150  | -1.554055 | 1.821830  |
| F | -3.654857 | 0.117067  | -1.208096 |
| F | -3.719410 | 0.067458  | 1.086481  |
| H | 1.718241  | -1.473980 | 1.755314  |
| H | 1.911393  | 1.265422  | -1.551669 |



|   |          |           |           |
|---|----------|-----------|-----------|
| O | 5.789825 | -0.311373 | 0.293044  |
| C | 6.611599 | 0.445302  | -0.606955 |
| H | 6.433032 | 1.517933  | -0.486647 |
| H | 7.636648 | 0.207634  | -0.330198 |
| H | 6.428049 | 0.147440  | -1.643557 |

38

**1c**

|   |           |           |           |
|---|-----------|-----------|-----------|
| C | -0.417775 | 1.215307  | 0.041538  |
| N | -1.813634 | 1.249869  | 0.030890  |
| B | -2.735601 | -0.000006 | 0.000110  |
| N | -1.813631 | -1.249871 | -0.030909 |
| C | -0.417772 | -1.215308 | -0.041559 |
| C | 0.279376  | 0.000000  | -0.000002 |
| C | 0.053110  | 2.548596  | 0.138860  |
| C | -1.061916 | 3.371840  | 0.172700  |
| C | -2.206510 | 2.545079  | 0.107873  |
| C | -2.206507 | -2.545076 | -0.107962 |
| C | -1.061912 | -3.371834 | -0.172820 |
| C | 0.053113  | -2.548592 | -0.138937 |
| C | -3.637567 | 2.965267  | 0.122193  |
| C | -3.637566 | -2.965251 | -0.122461 |
| C | 1.762755  | 0.000000  | -0.000002 |
| C | 2.472105  | 0.681811  | -1.001433 |
| C | 3.861405  | 0.680208  | -1.009412 |
| C | 4.561238  | 0.000001  | 0.000004  |
| C | 3.861401  | -0.680209 | 1.009416  |
| C | 2.472100  | -0.681814 | 1.001430  |
| H | 1.090133  | 2.844696  | 0.186689  |
| H | -1.081804 | 4.449441  | 0.242612  |
| H | -1.081798 | -4.449434 | -0.242769 |
| H | 1.090137  | -2.844690 | -0.186771 |
| H | -4.151225 | 2.627404  | -0.782322 |
| H | -4.162403 | 2.528308  | 0.976308  |
| H | -3.704610 | 4.051852  | 0.182796  |
| H | -3.704604 | -4.051920 | -0.181540 |
| H | -4.151767 | -2.626011 | 0.781217  |
| H | -4.161871 | -2.529561 | -0.977564 |
| H | 4.404642  | 1.197204  | -1.791108 |
| H | 4.404635  | -1.197206 | 1.791113  |
| F | -3.553720 | 0.027618  | -1.147495 |
| F | -3.553390 | -0.027641 | 1.147967  |
| H | 1.931733  | -1.194910 | 1.788331  |
| H | 1.931741  | 1.194904  | -1.788339 |

|           |           |           |           |
|-----------|-----------|-----------|-----------|
| C         | 5.990708  | 0.000002  | 0.000008  |
| N         | 7.151601  | 0.000004  | 0.000011  |
| 64        |           |           |           |
| <b>5a</b> |           |           |           |
| C         | -1.208046 | -0.522791 | 0.000061  |
| N         | -1.257696 | -1.928853 | -0.000059 |
| B         | 0.000695  | -2.846134 | -0.000032 |
| N         | 1.258593  | -1.928214 | 0.000041  |
| C         | 1.208148  | -0.522187 | 0.000236  |
| C         | -0.000135 | 0.173569  | 0.000190  |
| C         | -2.548498 | -0.076104 | 0.000015  |
| C         | -3.386945 | -1.200301 | -0.000028 |
| C         | -2.549879 | -2.341438 | -0.000049 |
| C         | 2.551013  | -2.340078 | -0.000071 |
| C         | 3.387434  | -1.198469 | 0.000083  |
| C         | 2.548348  | -0.074746 | 0.000267  |
| C         | -2.957010 | -3.776232 | 0.000012  |
| C         | 2.958929  | -3.774651 | -0.000926 |
| C         | -0.000585 | 1.666364  | 0.000095  |
| C         | 0.002466  | 2.363443  | -1.225468 |
| C         | 0.005819  | 3.761050  | -1.200446 |
| C         | 0.004237  | 4.478658  | -0.000290 |
| C         | 0.004922  | 3.761438  | 1.199879  |
| C         | 0.001574  | 2.363630  | 1.225321  |
| C         | -4.788534 | -0.860304 | -0.000019 |
| C         | 4.788817  | -0.857619 | 0.000137  |
| C         | 5.936619  | -1.666540 | -0.000081 |
| C         | 7.196203  | -1.074919 | 0.000069  |
| C         | 7.336478  | 0.320679  | 0.000392  |
| C         | 6.214796  | 1.147983  | 0.000568  |
| C         | 4.953171  | 0.552866  | 0.000438  |
| C         | -4.953755 | 0.550075  | 0.000022  |
| C         | -6.215750 | 1.144401  | 0.000050  |
| C         | -7.336923 | 0.316400  | 0.000032  |
| C         | -7.195783 | -1.079108 | -0.000007 |
| C         | -5.935829 | -1.669942 | -0.000029 |
| S         | -3.408653 | 1.429264  | 0.000067  |
| S         | 3.407562  | 1.431135  | 0.000590  |
| C         | -0.023787 | 5.988133  | -0.000949 |
| C         | 0.006064  | 1.626847  | -2.544296 |
| C         | 0.004160  | 1.627512  | 2.544420  |
| H         | -3.568715 | -3.992479 | -0.882018 |
| H         | -2.093890 | -4.438259 | -0.000952 |

|   |           |           |           |
|---|-----------|-----------|-----------|
| H | -3.567009 | -3.992880 | 0.883141  |
| H | 2.096185  | -4.437145 | 0.004753  |
| H | 3.564668  | -3.991718 | -0.886916 |
| H | 3.575113  | -3.989822 | 0.878209  |
| H | 0.012416  | 4.300031  | -2.144385 |
| H | 0.010821  | 4.300727  | 2.143633  |
| H | 5.842710  | -2.746660 | -0.000406 |
| H | 8.081321  | -1.701866 | -0.000099 |
| H | 8.326203  | 0.764204  | 0.000483  |
| H | 6.322625  | 2.226886  | 0.000791  |
| H | -6.324268 | 2.223236  | 0.000092  |
| H | -8.326923 | 0.759310  | 0.000058  |
| H | -8.080511 | -1.706603 | -0.000013 |
| H | -5.841243 | -2.750003 | -0.000046 |
| H | 0.490368  | 6.393217  | -0.876275 |
| H | -1.056619 | 6.354452  | -0.026488 |
| H | 0.447341  | 6.393139  | 0.898139  |
| H | -0.874791 | 0.983899  | -2.642214 |
| H | 0.007924  | 2.332466  | -3.377417 |
| H | 0.887490  | 0.984052  | -2.638009 |
| H | 0.006528  | 2.333431  | 3.377285  |
| H | -0.877383 | 0.985506  | 2.642391  |
| H | 0.884899  | 0.983849  | 2.638581  |
| F | 0.000767  | -3.664057 | 1.148228  |
| F | 0.001011  | -3.664047 | -1.148265 |

59

**5b**

|   |           |           |           |
|---|-----------|-----------|-----------|
| C | -1.191866 | -0.613891 | 0.034713  |
| N | -1.220369 | -2.019427 | 0.094444  |
| B | 0.044822  | -2.923265 | 0.067018  |
| N | 1.289546  | -1.995646 | -0.026146 |
| C | 1.229952  | -0.590146 | -0.059764 |
| C | 0.011331  | 0.093976  | -0.035456 |
| C | -2.542187 | -0.191095 | 0.005195  |
| C | -3.360262 | -1.330400 | 0.048394  |
| C | -2.504715 | -2.454582 | 0.104089  |
| C | 2.583230  | -2.402022 | -0.010076 |
| C | 3.413678  | -1.258016 | -0.031509 |
| C | 2.570615  | -0.136636 | -0.061312 |
| C | -2.886087 | -3.895742 | 0.150467  |
| C | 2.996736  | -3.834255 | 0.038632  |
| C | -0.005270 | 1.577105  | -0.085118 |
| C | 0.430506  | 2.261855  | -1.233392 |

|   |           |           |           |
|---|-----------|-----------|-----------|
| C | 0.409204  | 3.647620  | -1.283643 |
| C | -0.033780 | 4.385263  | -0.175253 |
| C | -0.463241 | 3.718412  | 0.978452  |
| C | -0.453420 | 2.323843  | 1.010369  |
| C | -4.768503 | -1.023697 | -0.003740 |
| C | 4.814761  | -0.917568 | -0.004113 |
| C | 5.961983  | -1.726615 | 0.029947  |
| C | 7.221331  | -1.134972 | 0.054926  |
| C | 7.361665  | 0.260625  | 0.047256  |
| C | 6.240304  | 1.087715  | 0.015270  |
| C | 4.979018  | 0.492164  | -0.008793 |
| C | -4.963785 | 0.379282  | -0.092087 |
| C | -6.237816 | 0.943790  | -0.157244 |
| C | -7.340607 | 0.091744  | -0.136568 |
| C | -7.169539 | -1.297891 | -0.052609 |
| C | -5.897515 | -1.858544 | 0.013082  |
| S | -3.439283 | 1.291394  | -0.100349 |
| S | 3.434747  | 1.369011  | -0.055673 |
| H | -3.360079 | -4.190189 | -0.792354 |
| H | -2.021373 | -4.533951 | 0.319034  |
| H | -3.612988 | -4.064697 | 0.950512  |
| H | 2.144141  | -4.501501 | -0.067128 |
| H | 3.712746  | -4.044383 | -0.761637 |
| H | 3.494701  | -4.049893 | 0.990327  |
| H | 0.732145  | 4.177676  | -2.172533 |
| H | -0.802646 | 4.266058  | 1.848345  |
| H | 5.868090  | -2.806660 | 0.037770  |
| H | 8.106114  | -1.761851 | 0.081065  |
| H | 8.351163  | 0.704251  | 0.066919  |
| H | 6.348089  | 2.166622  | 0.009855  |
| H | -6.369381 | 2.018062  | -0.223304 |
| H | -8.339550 | 0.511095  | -0.187117 |
| H | -8.040216 | -1.944605 | -0.039328 |
| H | -5.779834 | -2.934487 | 0.075685  |
| F | 0.112933  | -3.699278 | 1.242681  |
| F | -0.005046 | -3.783271 | -1.049351 |
| H | 0.771127  | 1.700694  | -2.097074 |
| H | -0.783192 | 1.813816  | 1.909366  |
| O | -0.009482 | 5.739150  | -0.315070 |
| C | -0.451948 | 6.536497  | 0.791798  |
| H | -1.499231 | 6.325791  | 1.028532  |
| H | 0.174468  | 6.361609  | 1.671713  |
| H | -0.347830 | 7.568709  | 0.463646  |

56

5c

|   |           |           |           |
|---|-----------|-----------|-----------|
| C | -1.212353 | -0.526360 | 0.026822  |
| N | -1.257447 | -1.932223 | 0.029311  |
| B | 0.000010  | -2.850076 | 0.000256  |
| N | 1.257457  | -1.932206 | -0.028900 |
| C | 1.212344  | -0.526340 | -0.026443 |
| C | -0.000008 | 0.162883  | 0.000206  |
| C | -2.557246 | -0.083648 | 0.018674  |
| C | -3.389066 | -1.212517 | 0.017745  |
| C | -2.547309 | -2.349817 | 0.024770  |
| C | 2.547321  | -2.349778 | -0.024575 |
| C | 3.389061  | -1.212464 | -0.017778 |
| C | 2.557236  | -0.083607 | -0.018547 |
| C | -2.948527 | -3.785759 | 0.018234  |
| C | 2.948634  | -3.785692 | -0.018336 |
| C | -0.000019 | 1.652035  | 0.000157  |
| C | 0.309132  | 2.356436  | -1.172095 |
| C | 0.305860  | 3.746475  | -1.178731 |
| C | -0.000028 | 4.444690  | 0.000055  |
| C | -0.305912 | 3.746558  | 1.178894  |
| C | -0.309174 | 2.356521  | 1.172360  |
| C | -4.793178 | -0.884868 | -0.003715 |
| C | 4.793171  | -0.884825 | 0.003461  |
| C | 5.933304  | -1.704450 | 0.010425  |
| C | 7.197696  | -1.124030 | 0.033352  |
| C | 7.350332  | 0.270244  | 0.050067  |
| C | 6.236603  | 1.107906  | 0.044468  |
| C | 4.970339  | 0.523223  | 0.022175  |
| C | -4.970338 | 0.523182  | -0.022331 |
| C | -6.236592 | 1.107882  | -0.044798 |
| C | -7.350329 | 0.270235  | -0.050692 |
| C | -7.197707 | -1.124041 | -0.034138 |
| C | -5.933324 | -1.704475 | -0.011053 |
| S | -3.433357 | 1.413774  | -0.008623 |
| S | 3.433353  | 1.413815  | 0.008754  |
| H | -3.481382 | -4.021271 | -0.909354 |
| H | -2.086792 | -4.444047 | 0.102739  |
| H | -3.631654 | -3.987009 | 0.849201  |
| H | 2.086648  | -4.444119 | -0.099066 |
| H | 3.628633  | -3.987595 | -0.851739 |
| H | 3.485053  | -4.020360 | 0.907390  |
| H | 0.537848  | 4.290315  | -2.086334 |
| H | -0.537903 | 4.290465  | 2.086456  |

|   |           |           |           |
|---|-----------|-----------|-----------|
| H | 5.829860  | -2.783540 | -0.001605 |
| H | 8.077191  | -1.758713 | 0.038597  |
| H | 8.343864  | 0.704671  | 0.067856  |
| H | 6.353907  | 2.185651  | 0.057660  |
| H | -6.353879 | 2.185629  | -0.057913 |
| H | -8.343854 | 0.704674  | -0.068622 |
| H | -8.077203 | -1.758719 | -0.039662 |
| H | -5.829901 | -2.783567 | 0.000769  |
| F | 0.029081  | -3.666148 | 1.148265  |
| F | -0.029030 | -3.666278 | -1.147644 |
| H | 0.543108  | 1.814336  | -2.081198 |
| H | -0.543142 | 1.814485  | 2.081504  |
| C | -0.000034 | 5.874730  | 0.000001  |
| N | -0.000034 | 7.035505  | -0.000045 |

70

**8a**

|   |           |           |           |
|---|-----------|-----------|-----------|
| C | 1.208807  | -0.695425 | 0.005250  |
| N | 1.259123  | -2.100867 | 0.010149  |
| B | 0.000051  | -3.019672 | 0.000205  |
| N | -1.258963 | -2.100824 | -0.010042 |
| C | -1.208450 | -0.695398 | -0.005167 |
| C | 0.000197  | 0.000043  | 0.000045  |
| C | 2.548020  | -0.246089 | 0.002475  |
| C | 3.386014  | -1.379051 | 0.002693  |
| C | 2.549079  | -2.519391 | 0.008155  |
| C | -2.548977 | -2.519171 | -0.007997 |
| C | -3.385763 | -1.378711 | -0.002721 |
| C | -2.547605 | -0.245877 | -0.002544 |
| C | 0.000125  | 1.492600  | 0.000121  |
| C | -0.006926 | 2.189817  | -1.225377 |
| C | -0.010859 | 3.587561  | -1.199900 |
| C | -0.006527 | 4.304730  | 0.000402  |
| C | -0.003507 | 3.587287  | 1.200669  |
| C | 0.001136  | 2.189646  | 1.225855  |
| C | 0.020444  | 5.814176  | 0.000680  |
| C | 0.002439  | 1.452738  | 2.544515  |
| C | -0.013473 | 1.453231  | -2.544199 |
| C | 2.951351  | -3.954732 | -0.019446 |
| C | -2.951492 | -3.954438 | 0.019837  |
| C | -4.761760 | -0.999386 | -0.003026 |
| C | -4.937092 | 0.373312  | -0.004556 |
| S | -3.411566 | 1.259896  | -0.005101 |
| S | 3.412301  | 1.259528  | 0.004836  |

|   |            |           |           |
|---|------------|-----------|-----------|
| C | 4.937698   | 0.372666  | 0.004271  |
| C | 4.762083   | -0.999986 | 0.002866  |
| C | 6.306543   | 0.797384  | 0.002225  |
| C | 7.168455   | -0.331995 | -0.001387 |
| S | 6.282716   | -1.859612 | -0.004308 |
| S | -6.282587  | -1.858681 | 0.004046  |
| C | -7.167999  | -0.330860 | 0.000960  |
| C | -6.305843  | 0.798327  | -0.002662 |
| C | 6.872626   | 2.084682  | 0.004119  |
| C | 8.254589   | 2.222254  | 0.002223  |
| C | 9.092622   | 1.094156  | -0.001356 |
| C | 8.557579   | -0.191251 | -0.003031 |
| C | -8.557092  | -0.189800 | 0.002485  |
| C | -9.091838  | 1.095731  | 0.000668  |
| C | -8.253550  | 2.223641  | -0.002925 |
| C | -6.871619  | 2.085760  | -0.004695 |
| H | -0.020133  | 4.126855  | -2.143598 |
| H | -0.007447  | 4.126391  | 2.144516  |
| H | -0.466211  | 6.218922  | -0.890238 |
| H | -0.478811  | 6.218791  | 0.884726  |
| H | 1.053358   | 6.181038  | 0.008270  |
| H | -0.001643  | 2.158099  | 3.377802  |
| H | -0.875874  | 0.805828  | 2.639117  |
| H | 0.886427   | 0.813892  | 2.641344  |
| H | -0.896414  | 0.812358  | -2.637067 |
| H | -0.014741  | 2.158790  | -3.377328 |
| H | 0.865900   | 0.808396  | -2.643040 |
| H | 3.899980   | -4.089537 | 0.504450  |
| H | 2.193975   | -4.586917 | 0.442981  |
| H | 3.089734   | -4.288778 | -1.054079 |
| H | -3.091258  | -4.287891 | 1.054477  |
| H | -3.899512  | -4.089347 | -0.505149 |
| H | -2.193671  | -4.586997 | -0.441327 |
| H | 6.232621   | 2.960669  | 0.007241  |
| H | 8.693685   | 3.213973  | 0.003679  |
| H | 10.169422  | 1.222873  | -0.002842 |
| H | 9.204974   | -1.061000 | -0.005680 |
| H | -9.204692  | -1.059398 | 0.005137  |
| H | -10.168610 | 1.224696  | 0.002051  |
| H | -8.692420  | 3.215461  | -0.004492 |
| H | -6.231400  | 2.961591  | -0.007825 |
| F | 0.016546   | -3.834413 | -1.148074 |
| F | -0.016440  | -3.834004 | 1.148783  |

65

**8b**

|   |           |           |           |
|---|-----------|-----------|-----------|
| C | 1.224293  | -0.749730 | 0.069530  |
| N | 1.274072  | -2.155157 | 0.042971  |
| B | 0.022368  | -3.075252 | -0.053302 |
| N | -1.236423 | -2.160960 | -0.097858 |
| C | -1.198004 | -0.755981 | -0.044928 |
| C | 0.010433  | -0.057272 | 0.033093  |
| C | 2.567341  | -0.303831 | 0.075535  |
| C | 3.401171  | -1.440517 | 0.052436  |
| C | 2.562267  | -2.577428 | 0.032504  |
| C | -2.521259 | -2.593450 | -0.115441 |
| C | -3.369236 | -1.463905 | -0.076464 |
| C | -2.544531 | -0.321086 | -0.031320 |
| C | 0.005029  | 1.425721  | 0.078856  |
| C | -0.433972 | 2.173997  | -1.019505 |
| C | -0.433669 | 3.568600  | -0.989769 |
| C | -0.002603 | 4.234230  | 0.164172  |
| C | 0.431954  | 3.495145  | 1.275100  |
| C | 0.442706  | 2.109278  | 1.227412  |
| C | 2.961374  | -4.012682 | -0.029844 |
| C | -2.907894 | -4.033428 | -0.129802 |
| C | -4.750896 | -1.108265 | -0.041066 |
| C | -4.947764 | 0.258529  | 0.035485  |
| S | -3.436967 | 1.168247  | 0.056354  |
| S | 3.447450  | 1.195258  | 0.067774  |
| C | 4.965387  | 0.298279  | 0.029327  |
| C | 4.779662  | -1.072274 | 0.029395  |
| C | 6.337194  | 0.712835  | 0.006271  |
| C | 7.190361  | -0.423028 | -0.015526 |
| S | 6.293279  | -1.943938 | -0.005225 |
| S | -6.257708 | -1.991992 | -0.068737 |
| C | -7.167104 | -0.481178 | 0.022224  |
| C | -6.322988 | 0.660511  | 0.072335  |
| C | 6.912992  | 1.995783  | 0.001694  |
| C | 8.295729  | 2.122997  | -0.024329 |
| C | 9.124988  | 0.988651  | -0.046297 |
| C | 8.580230  | -0.292686 | -0.041921 |
| C | -8.558116 | -0.363256 | 0.045826  |
| C | -9.113291 | 0.911419  | 0.120333  |
| C | -8.293094 | 2.051439  | 0.170439  |
| C | -6.909223 | 1.936524  | 0.147304  |
| H | -0.766064 | 4.117346  | -1.861666 |
| H | 0.755934  | 4.024303  | 2.164131  |



|   |            |           |           |
|---|------------|-----------|-----------|
| H | 3.901898   | -4.164212 | 0.504212  |
| H | 2.196240   | -4.655575 | 0.404038  |
| H | 3.114247   | -4.318585 | -1.071034 |
| H | -3.029292  | -4.403338 | 0.894584  |
| H | -3.861082  | -4.161413 | -0.646761 |
| H | -2.149446  | -4.641831 | -0.621779 |
| H | 6.279776   | 2.876521  | 0.018528  |
| H | 8.742260   | 3.111393  | -0.027803 |
| H | 10.202539  | 1.109249  | -0.066860 |
| H | 9.220805   | -1.167307 | -0.058768 |
| H | -9.191610  | -1.242332 | 0.007630  |
| H | -10.191896 | 1.022314  | 0.140095  |
| H | -8.747624  | 3.034480  | 0.228478  |
| H | -6.283012  | 2.821531  | 0.186979  |
| F | 0.097488   | -3.856949 | -1.222651 |
| F | -0.046456  | -3.923442 | 1.068883  |
| H | -0.763910  | 1.665128  | -1.919135 |
| H | 0.775722   | 1.547116  | 2.093450  |
| O | 0.031069   | 5.587708  | 0.301970  |
| C | -0.403550  | 6.387061  | -0.806786 |
| H | -0.292978  | 7.418784  | -0.479272 |
| H | 0.223639   | 6.206920  | -1.685050 |
| H | -1.451737  | 6.183249  | -1.045420 |

62

**8c**

|   |           |           |           |
|---|-----------|-----------|-----------|
| C | 1.212914  | -0.693807 | 0.035459  |
| N | 1.257911  | -2.099182 | 0.040838  |
| B | 0.000020  | -3.018111 | -0.000145 |
| N | -1.257879 | -2.099203 | -0.040926 |
| C | -1.212902 | -0.693836 | -0.035553 |
| C | 0.000002  | -0.005077 | -0.000070 |
| C | 2.557115  | -0.249669 | 0.031369  |
| C | 3.387518  | -1.387996 | 0.033321  |
| C | 2.545073  | -2.523820 | 0.039426  |
| C | -2.545044 | -2.523863 | -0.039522 |
| C | -3.387498 | -1.388052 | -0.033446 |
| C | -2.557101 | -0.249711 | -0.031482 |
| C | -0.000027 | 1.483722  | -0.000117 |
| C | -0.319395 | 2.188297  | -1.169751 |
| C | -0.316280 | 3.578346  | -1.176333 |
| C | -0.000100 | 4.276538  | -0.000224 |
| C | 0.316119  | 3.578453  | 1.175936  |
| C | 0.319303  | 2.188402  | 1.169463  |

|   |            |           |           |
|---|------------|-----------|-----------|
| C | 2.940725   | -3.960568 | 0.011000  |
| C | -2.940597  | -3.960641 | -0.011135 |
| C | -4.766943  | -1.023361 | -0.016683 |
| C | -4.955688  | 0.347014  | 0.000898  |
| S | -3.439757  | 1.246760  | -0.007542 |
| S | 3.439773   | 1.246806  | 0.007714  |
| C | 4.955708   | 0.347070  | -0.000640 |
| C | 4.766960   | -1.023309 | 0.016803  |
| C | 6.328213   | 0.759389  | -0.016903 |
| C | 7.178702   | -0.378483 | -0.013589 |
| S | 6.278767   | -1.897624 | 0.009499  |
| S | -6.278757  | -1.897668 | -0.009434 |
| C | -7.178686  | -0.378526 | 0.013814  |
| C | -6.328191  | 0.759340  | 0.017204  |
| C | 6.906329   | 2.041090  | -0.034709 |
| C | 8.289421   | 2.164965  | -0.048918 |
| C | 9.116277   | 1.028637  | -0.045717 |
| C | 8.569071   | -0.251409 | -0.027880 |
| C | -8.569054  | -0.251446 | 0.028176  |
| C | -9.116251  | 1.028602  | 0.046133  |
| C | -8.289389  | 2.164925  | 0.049398  |
| C | -6.906298  | 2.041042  | 0.035141  |
| H | -0.555881  | 4.122192  | -2.081951 |
| H | 0.555692   | 4.122380  | 2.081514  |
| H | 3.883365   | -4.101246 | 0.544009  |
| H | 2.175826   | -4.591257 | 0.462679  |
| H | 3.088591   | -4.290332 | -1.023667 |
| H | -3.086832  | -4.290920 | 1.023598  |
| H | -3.884004  | -4.101157 | -0.542808 |
| H | -2.176308  | -4.591068 | -0.464240 |
| H | 6.275003   | 2.923296  | -0.037296 |
| H | 8.738163   | 3.152211  | -0.062738 |
| H | 10.194201  | 1.146820  | -0.057285 |
| H | 9.207929   | -1.127383 | -0.025411 |
| H | -9.207917  | -1.127417 | 0.025663  |
| H | -10.194175 | 1.146790  | 0.057748  |
| H | -8.738125  | 3.152172  | 0.063310  |
| H | -6.274966  | 2.923244  | 0.037786  |
| F | 0.045087   | -3.830911 | -1.147896 |
| F | -0.045015  | -3.831170 | 1.147419  |
| H | -0.560601  | 1.646272  | -2.077053 |
| H | 0.560534   | 1.646463  | 2.076808  |
| C | -0.000145  | 5.706598  | -0.000280 |
| N | -0.000146  | 6.867341  | -0.000333 |

## 7. Copies of $^1\text{H}$ , $^{13}\text{C}$ NMR and High Resolution Mass Spectra

$^1\text{H}$  NMR spectrum of **1a** ( $\text{CDCl}_3$ , 400 MHz)

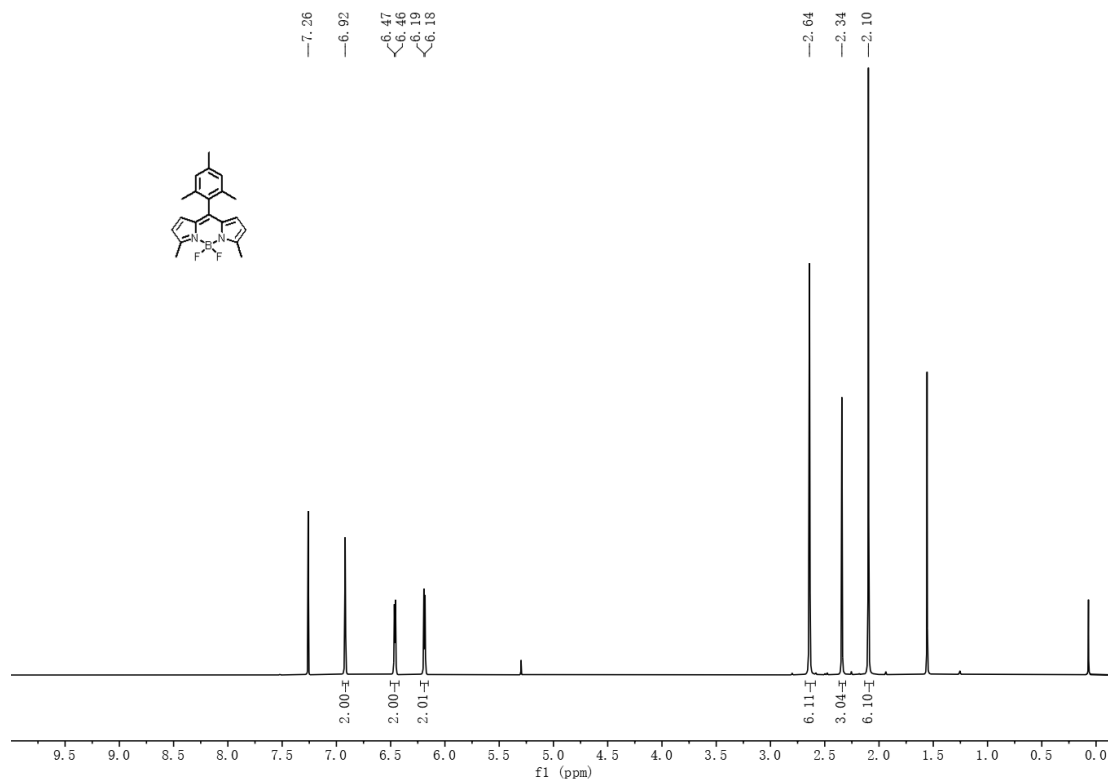

$^{13}\text{C}$  NMR Spectrum of **1a** ( $\text{CDCl}_3$ , 101 MHz)

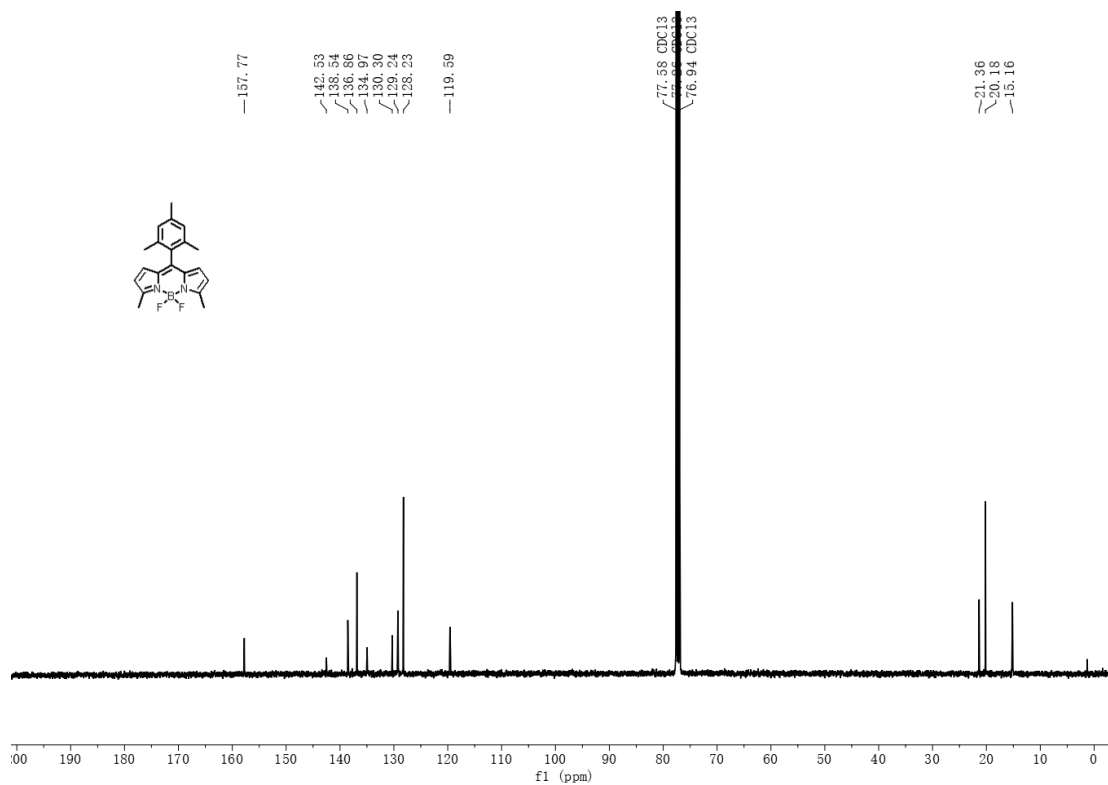

DEPT Spectrum of **1a** (CDCl<sub>3</sub>, 101 MHz)

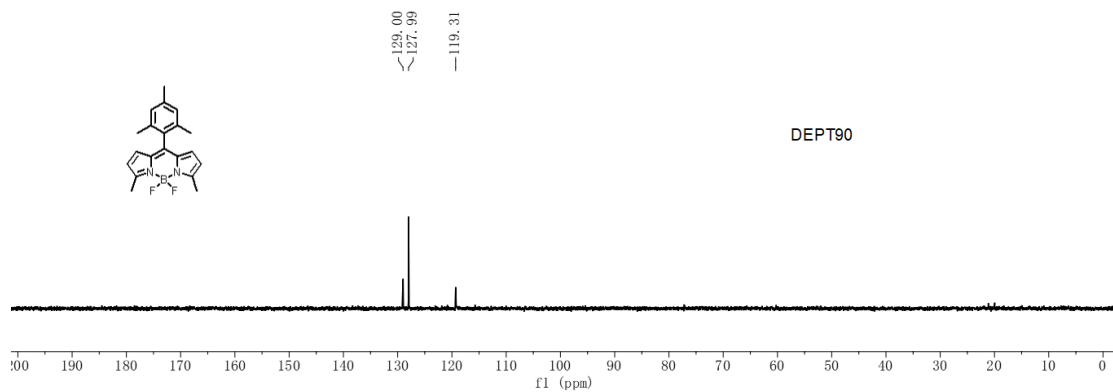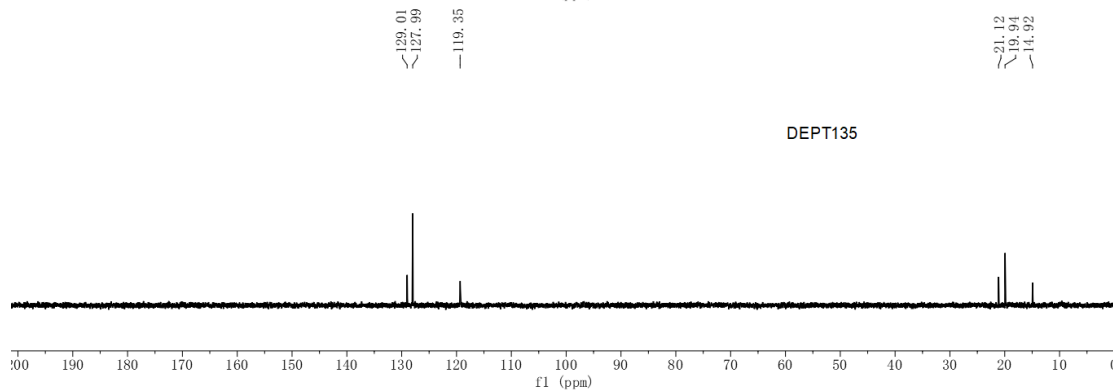

$^1\text{H}$  NMR spectrum of **2a** ( $\text{CDCl}_3$ , 400 MHz)

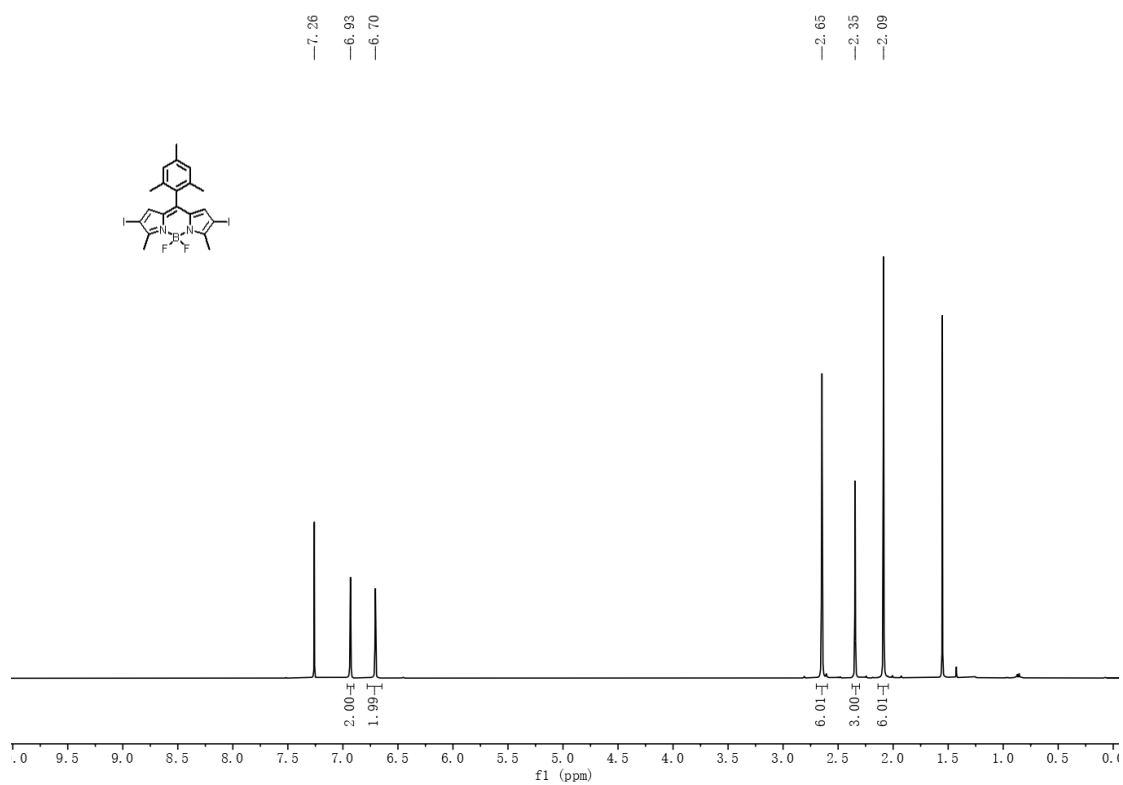

$^{13}\text{C}$  NMR Spectrum of **2a** ( $\text{CDCl}_3$ , 101 MHz)

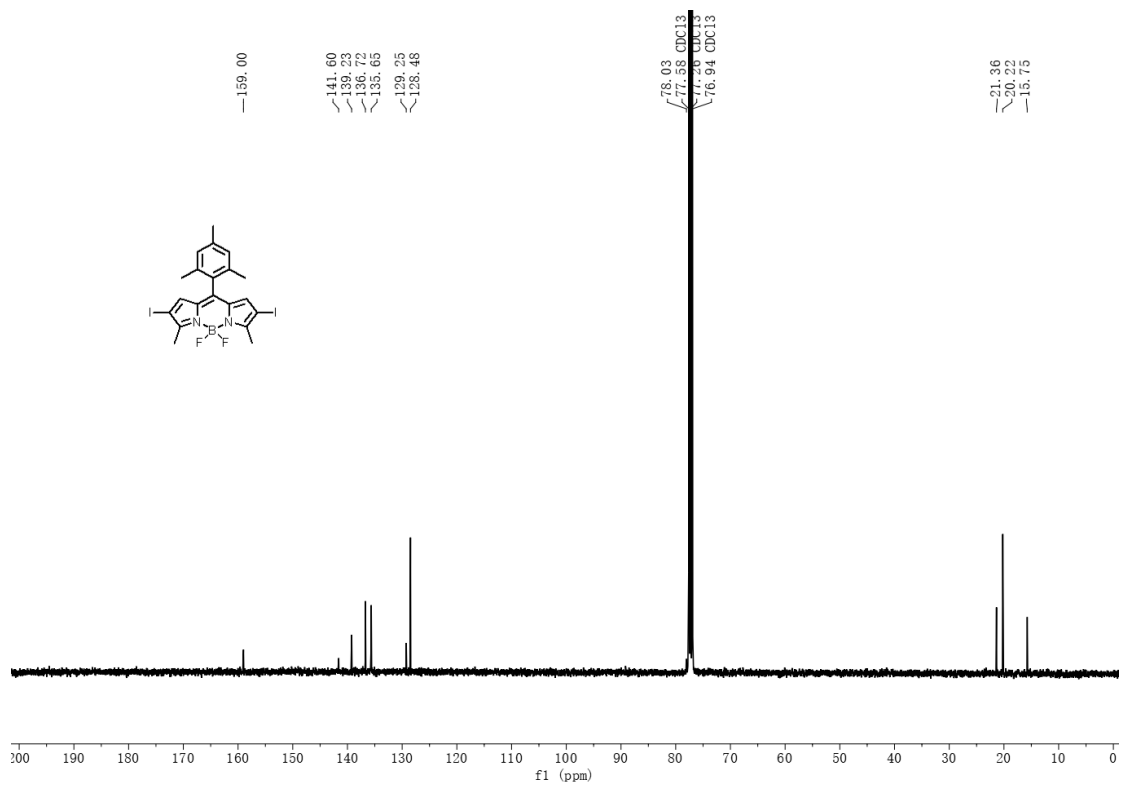

## DEPT Spectrum of **2a** (CDCl<sub>3</sub>, 101 MHz)

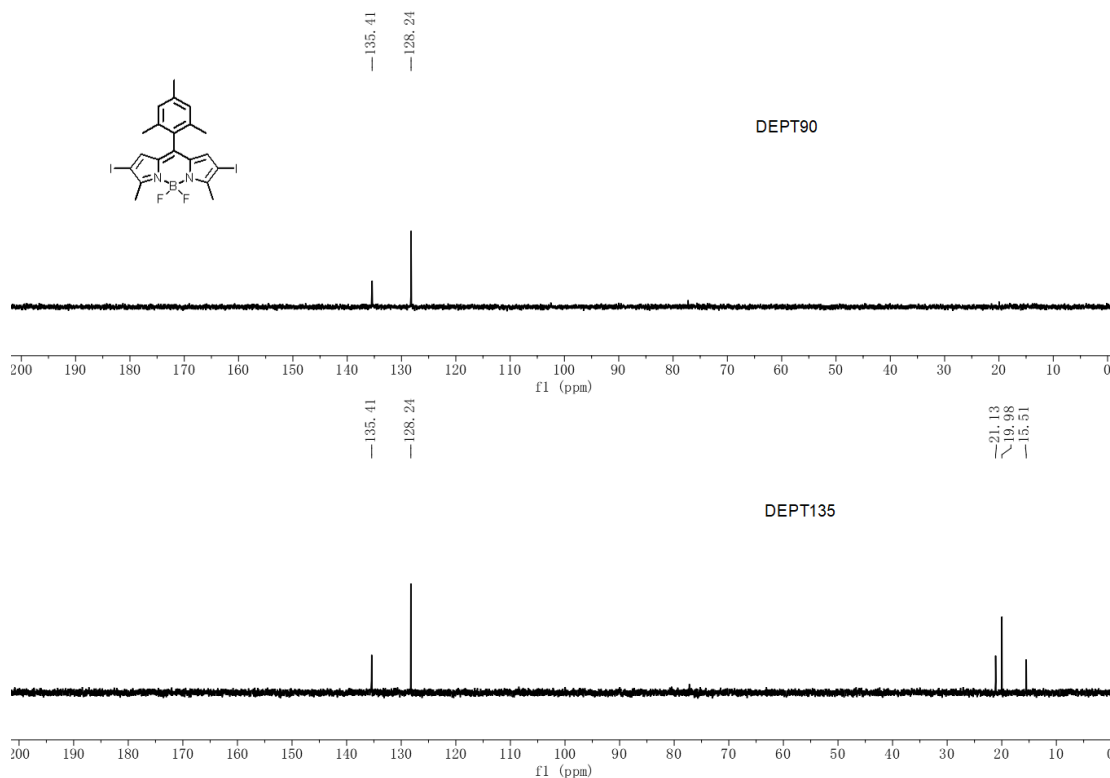

## HRMS Spectrum of **2a**

H-2a#308 RT: 1.83 AV: 1 NL: 2.81E6  
T: FTMS - p ESI Full ms [250.0000-1200.0000]

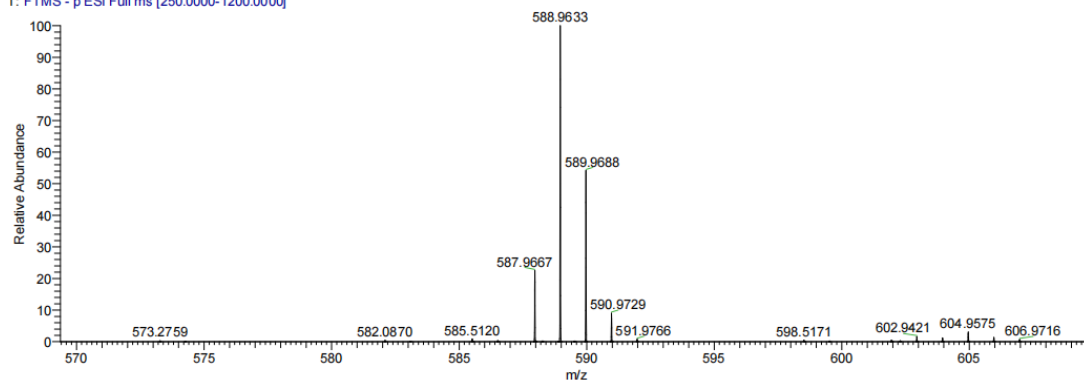

H-2a#308 RT: 1.83  
T: FTMS - p ESI Full ms [250.0000-1200.0000]  
m/z = 569.3644-609.8296

| m/z      | Intensity | Relative | Theo. Mass | Delta (ppm) | Composition                                                                    |
|----------|-----------|----------|------------|-------------|--------------------------------------------------------------------------------|
| 588.9633 | 2829804.0 | 100.00   | 588.9615   | 1.82        | C <sub>20</sub> H <sub>18</sub> N <sub>2</sub> B F <sub>2</sub> I <sub>2</sub> |

<sup>1</sup>H NMR spectrum of **3a** (CDCl<sub>3</sub>, 400 MHz)

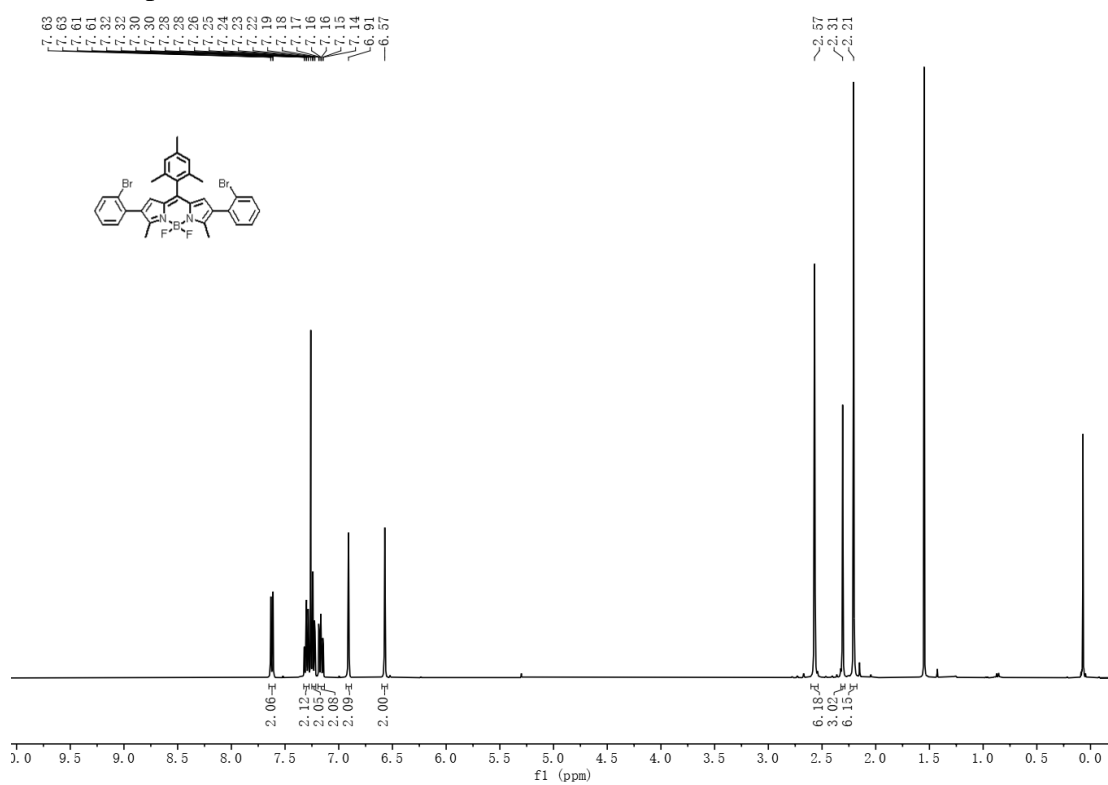

<sup>13</sup>C NMR Spectrum of **3a** (CDCl<sub>3</sub>, 101 MHz)

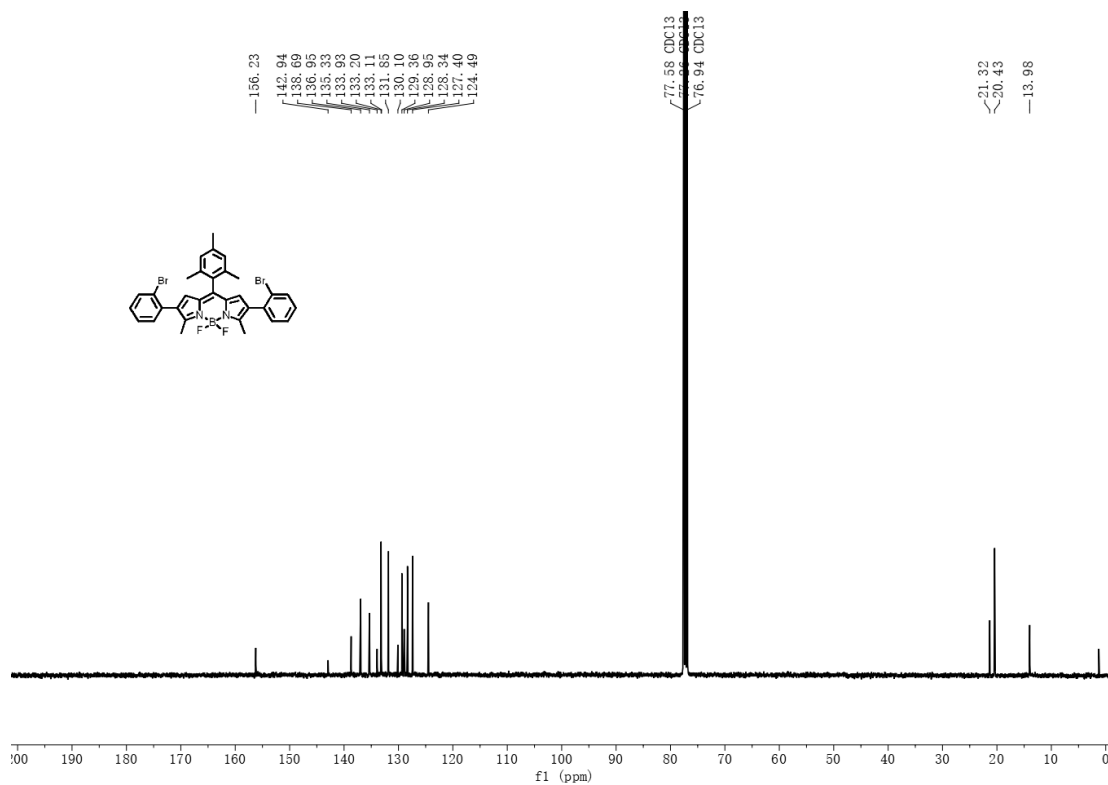

## DEPT Spectrum of **3a** (CDCl<sub>3</sub>, 101 MHz)

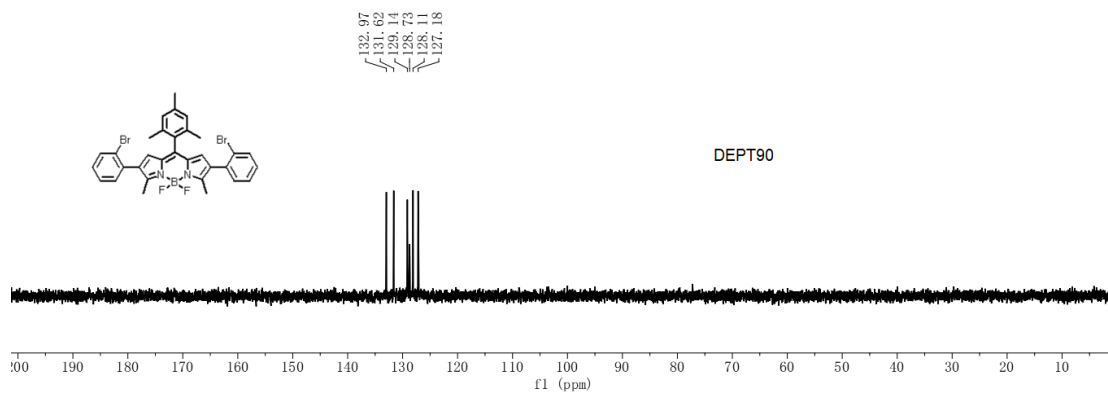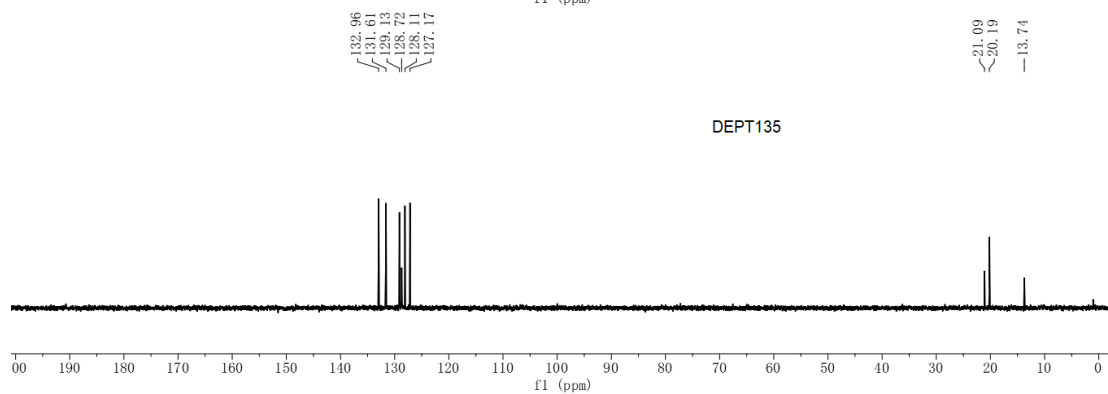

## HRMS Spectrum of **3a**

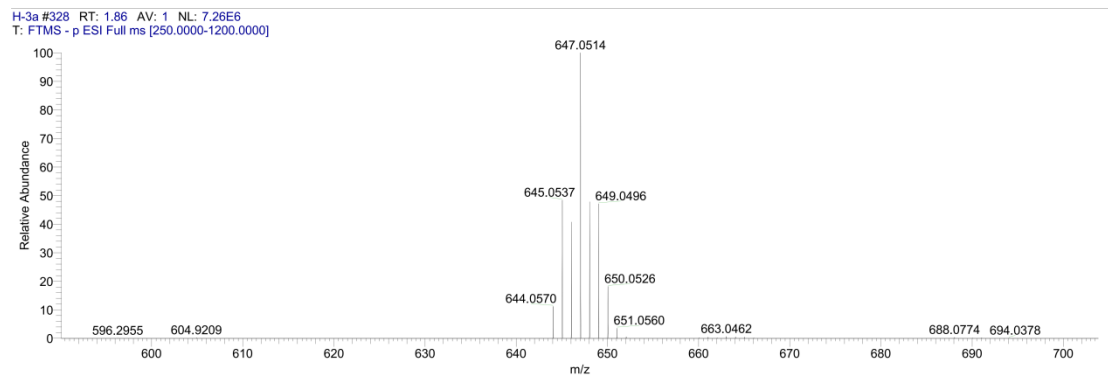



$^1\text{H}$  NMR spectrum of **4a** ( $\text{CDCl}_3$ , 400 MHz)

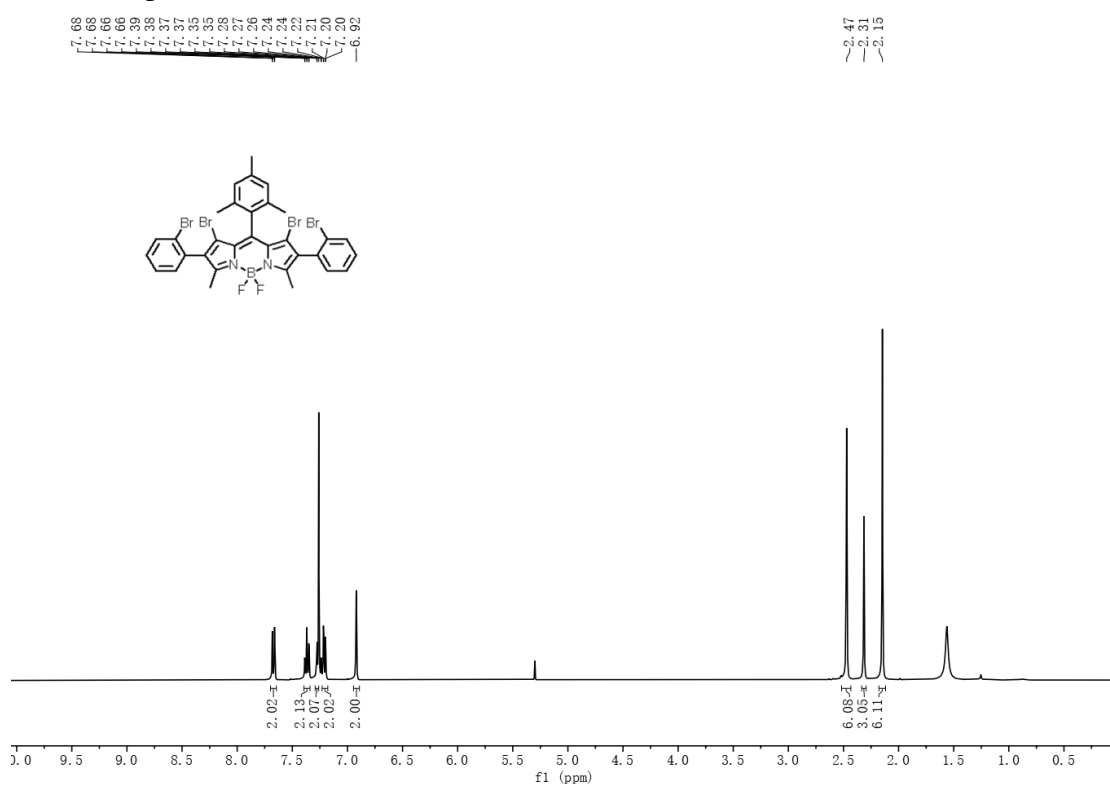

$^{13}\text{C}$  NMR Spectrum of **4a** ( $\text{CDCl}_3$ , 101 MHz)

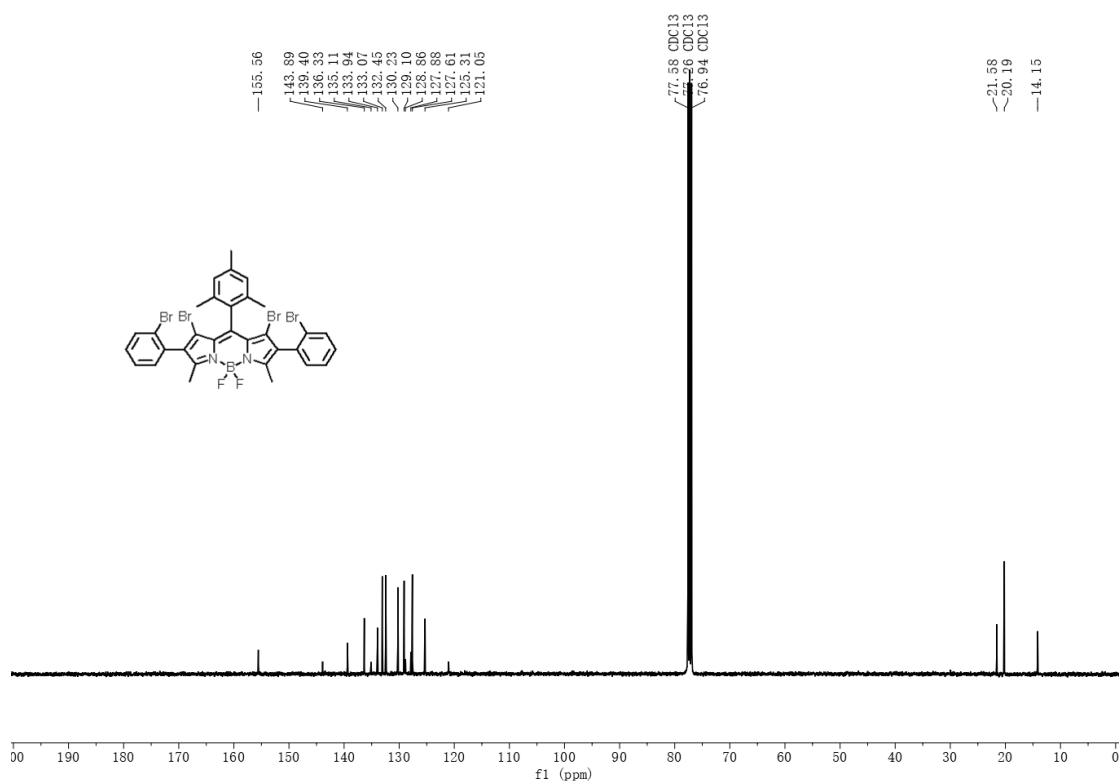

## DEPT Spectrum of **4a** (CDCl<sub>3</sub>, 101 MHz)

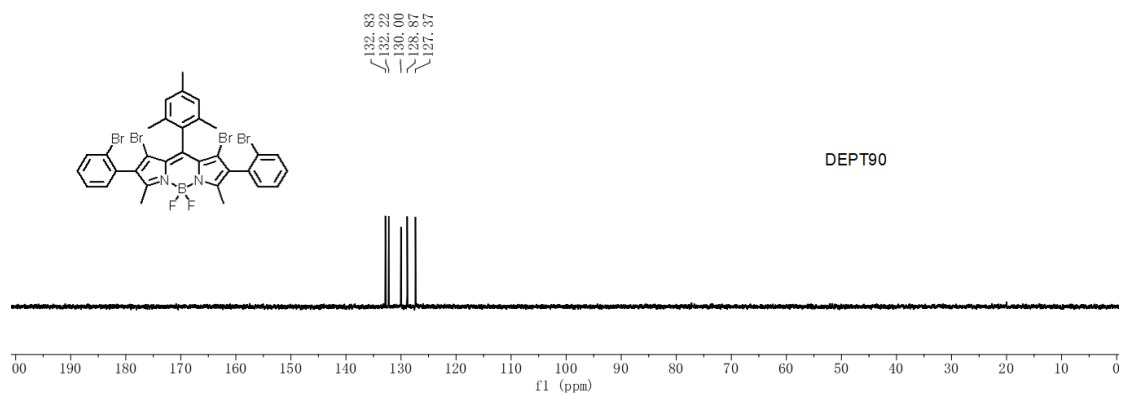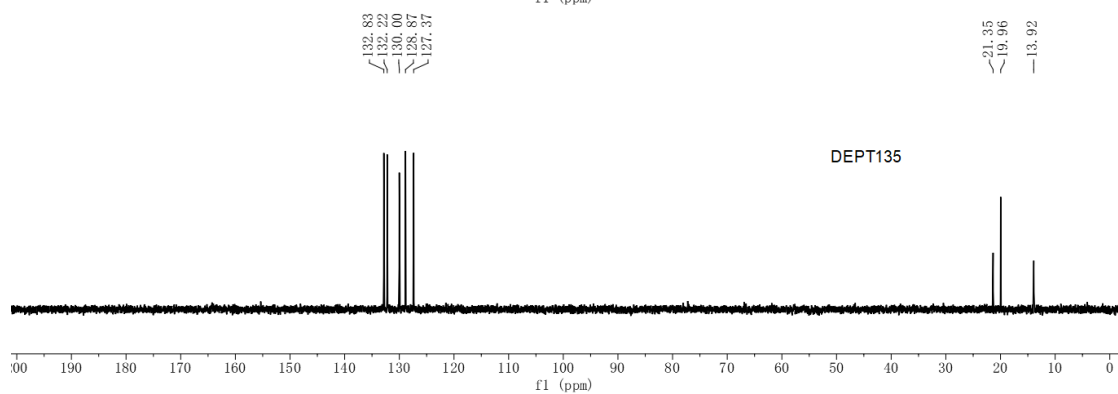

## HRMS Spectrum of **4a**

H-4a #304 RT: 1.71 AV: 1 NL: 4.51E5  
T: FTMS - p ESI Full ms [250.0000-1200.0000]

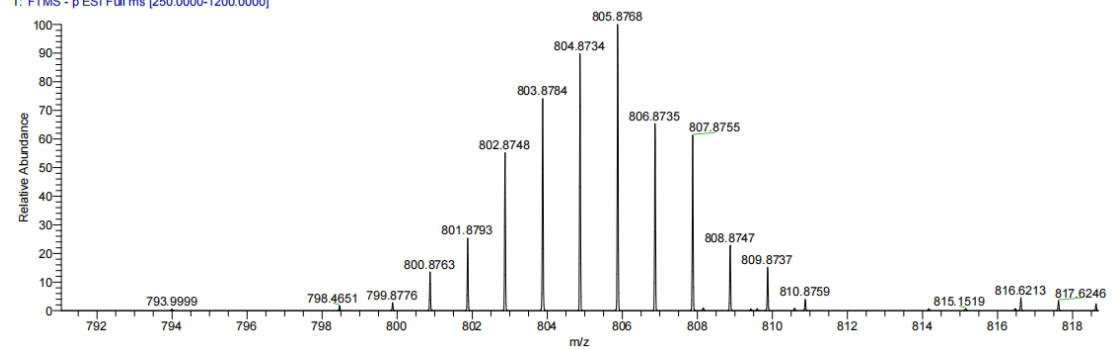

$^1\text{H}$  NMR spectrum of **5a** ( $\text{CDCl}_3$ , 400 MHz)

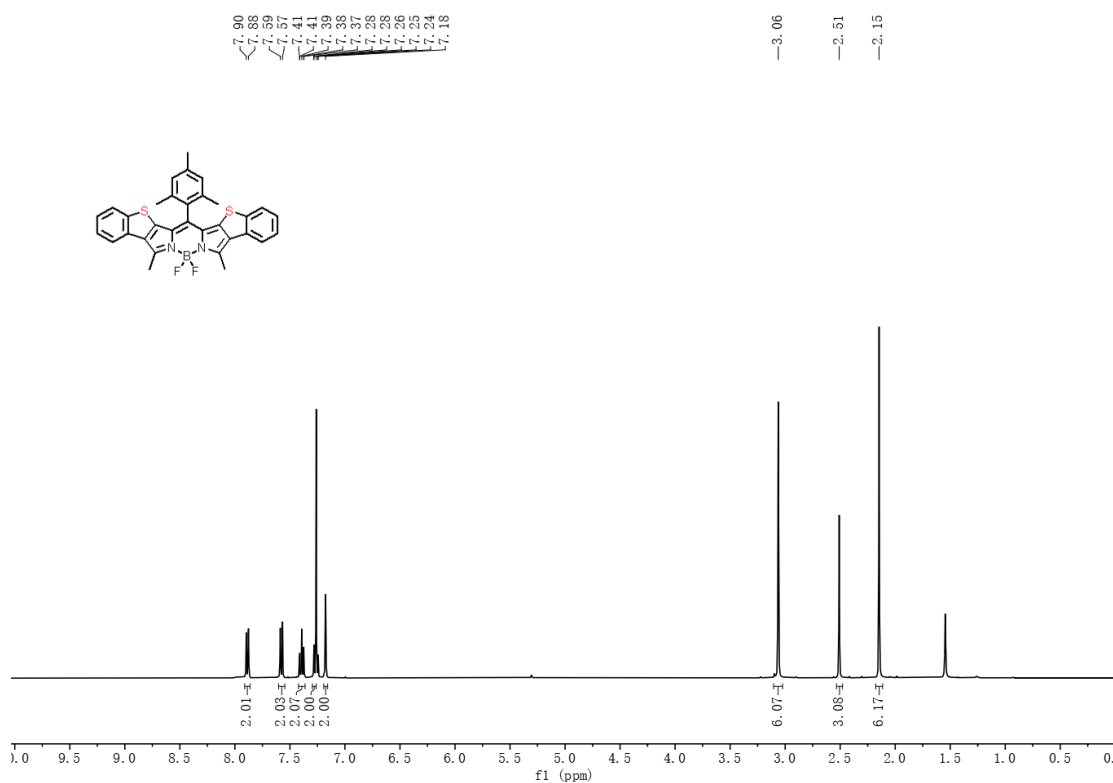

$^{13}\text{C}$  NMR Spectrum of **5a** ( $\text{CDCl}_3$ , 101 MHz)

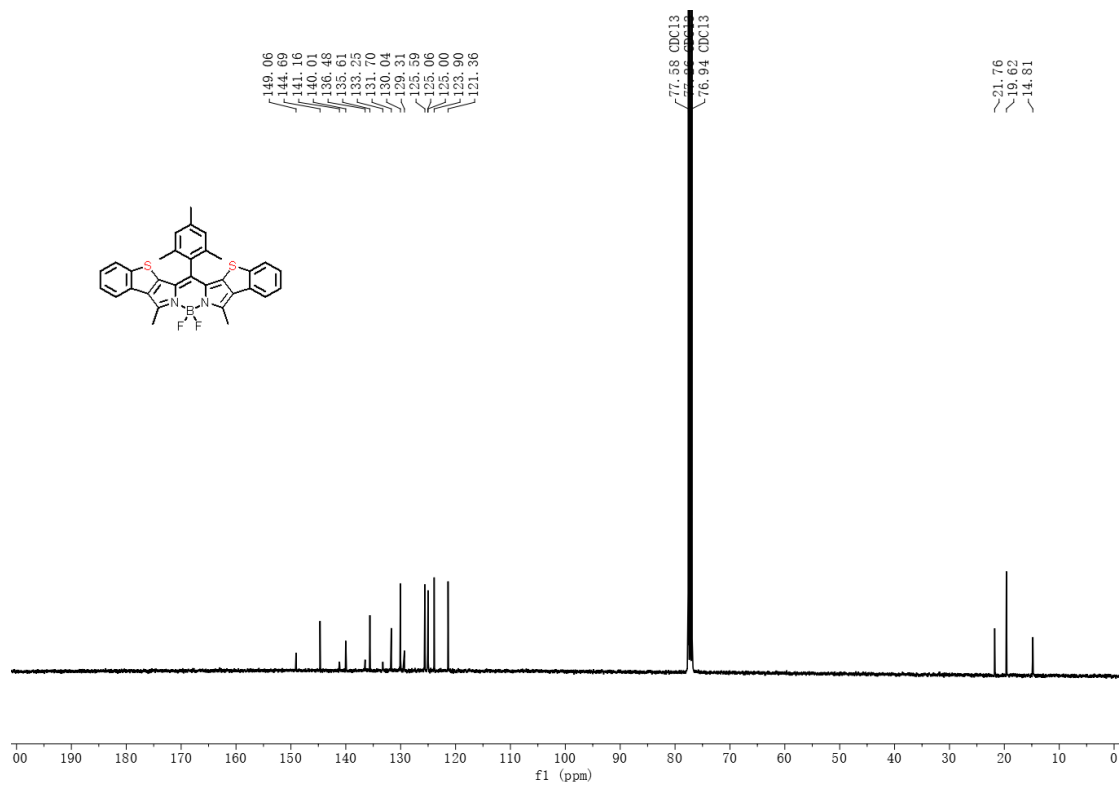

## DEPT Spectrum of **5a** (CDCl<sub>3</sub>, 101 MHz)

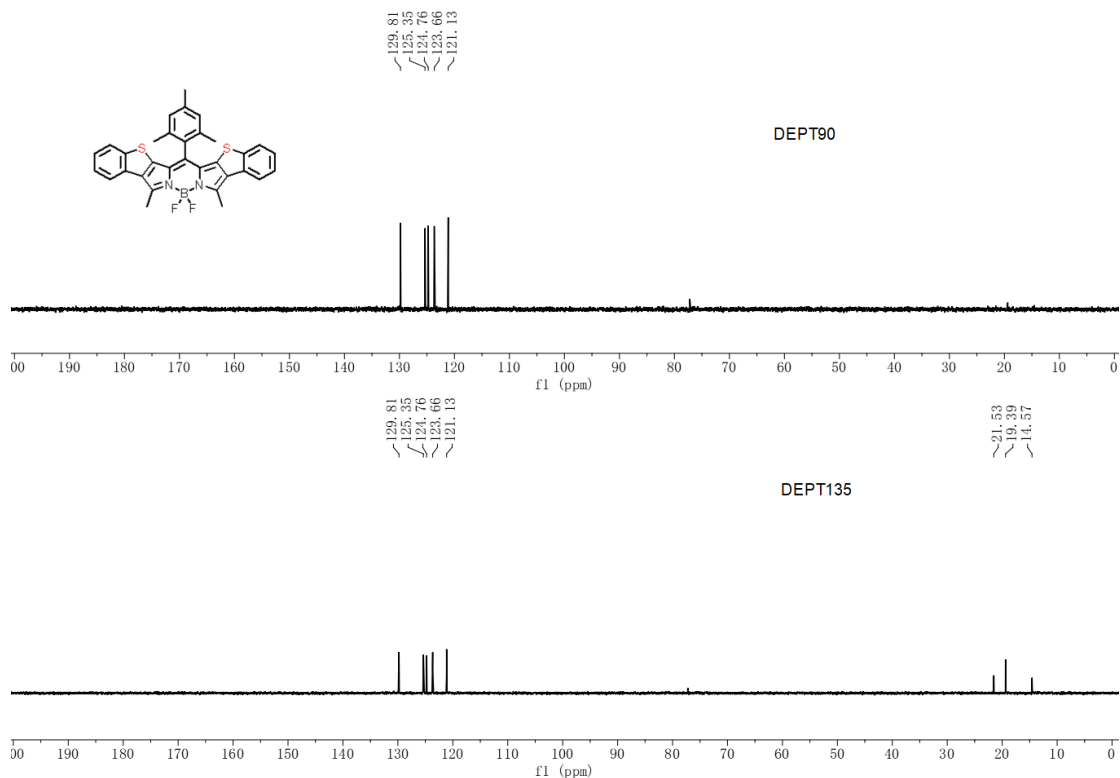

## HRMS Spectrum of **5a**

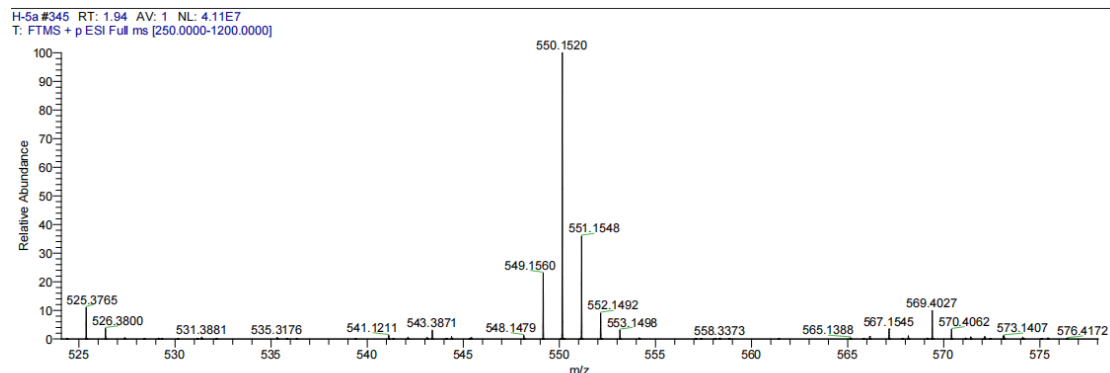

H-5a#345 RT: 1.94  
T: FTMS + p ESI Full ms [250.0000-1200.0000]  
m/z = 524.0801-578.0404

| m/z      | Intensity  | Relative | Theo. Mass | Delta (ppm) | Composition                                                                    |
|----------|------------|----------|------------|-------------|--------------------------------------------------------------------------------|
| 550.1520 | 41715632.0 | 100.00   | 550.1515   | 0.50        | C <sub>32</sub> H <sub>25</sub> N <sub>2</sub> B F <sub>2</sub> S <sub>2</sub> |

$^1\text{H}$  NMR spectrum of **6a** ( $\text{CDCl}_3$ , 400 MHz)

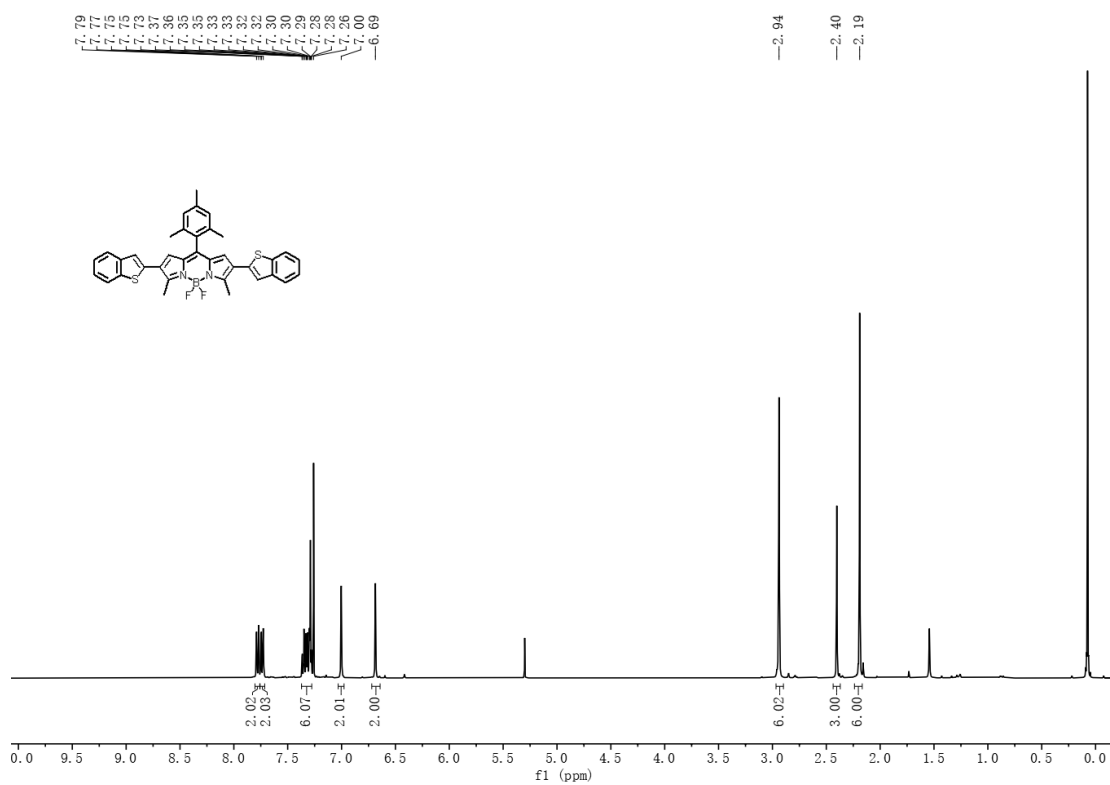

$^{13}\text{C}$  NMR Spectrum of **6a** ( $\text{CDCl}_3$ , 101 MHz)

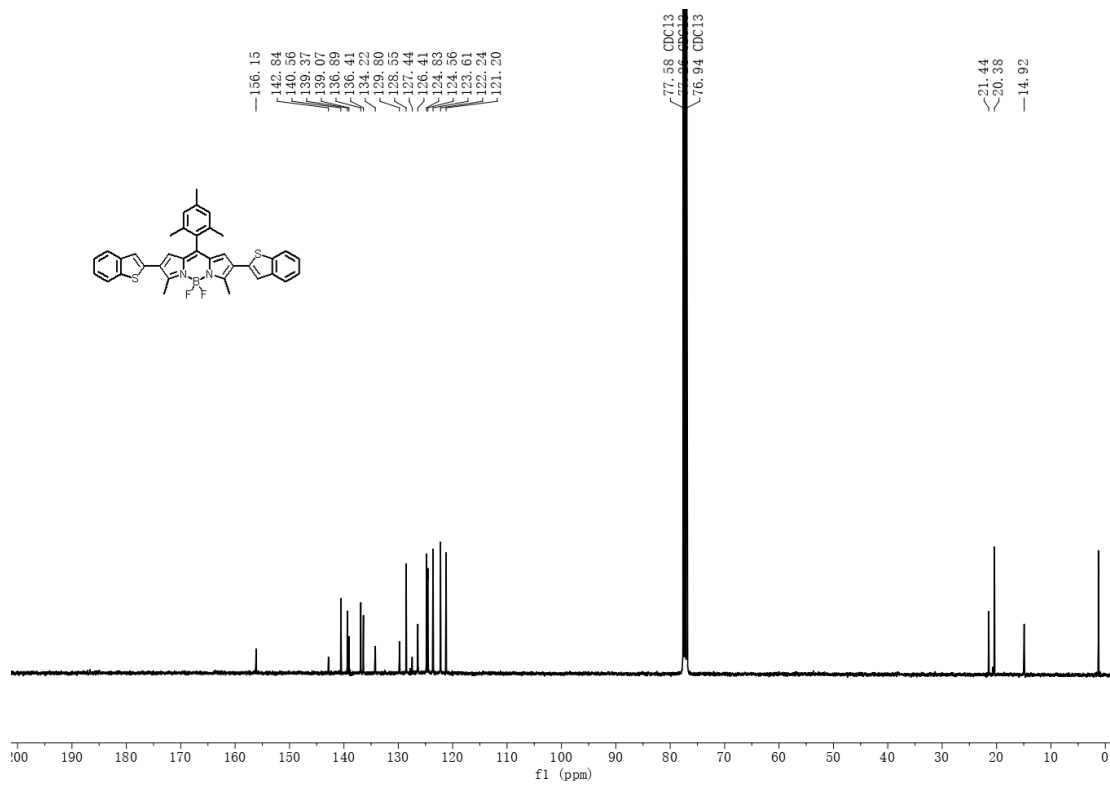

## DEPT Spectrum of **6a** (CDCl<sub>3</sub>, 101 MHz)

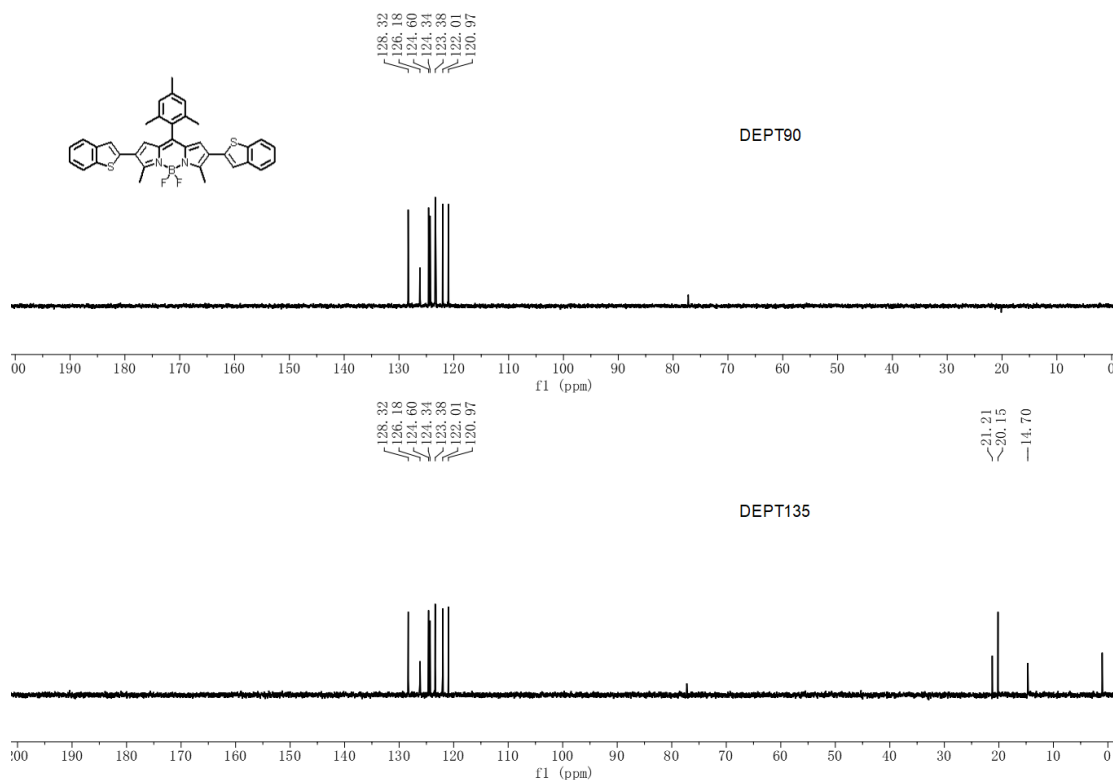

## HRMS Spectrum of **6a**

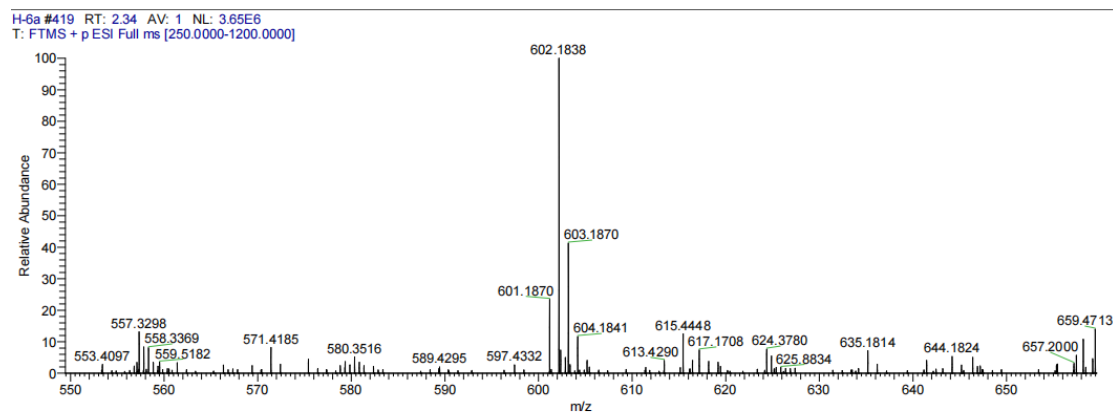

H-6a#419 RT: 2.34  
T: FTMS + p ESI Full ms [250.0000-1200.0000]  
m/z = 549.4430-659.6330

| m/z      | Intensity | Relative | Theo. Mass | Delta (ppm) | Composition                                                                    |
|----------|-----------|----------|------------|-------------|--------------------------------------------------------------------------------|
| 602.1838 | 3769975.8 | 100.00   | 602.1828   | 1.06        | C <sub>36</sub> H <sub>29</sub> N <sub>2</sub> B F <sub>2</sub> S <sub>2</sub> |

$^1\text{H}$  NMR spectrum of **7a** ( $\text{CDCl}_3$ , 400 MHz)

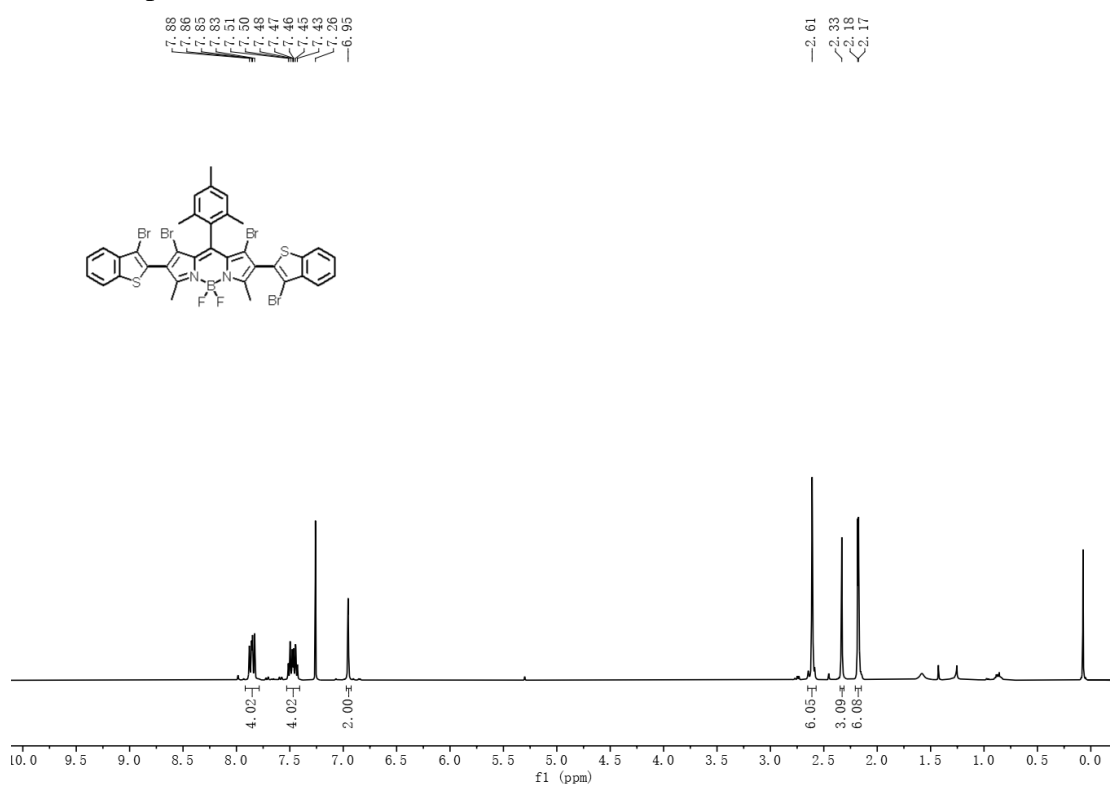

$^{13}\text{C}$  NMR Spectrum of **7a** ( $\text{CDCl}_3$ , 101 MHz)

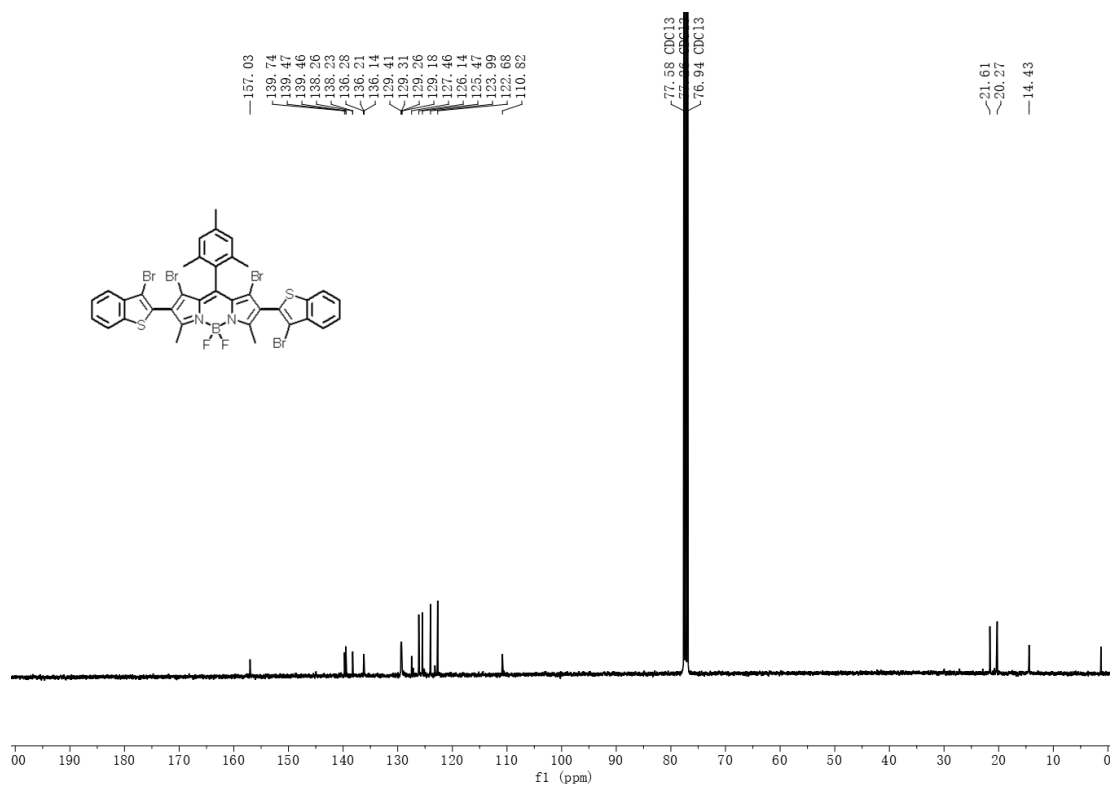

## DEPT Spectrum of **7a** (CDCl<sub>3</sub>, 101 MHz)

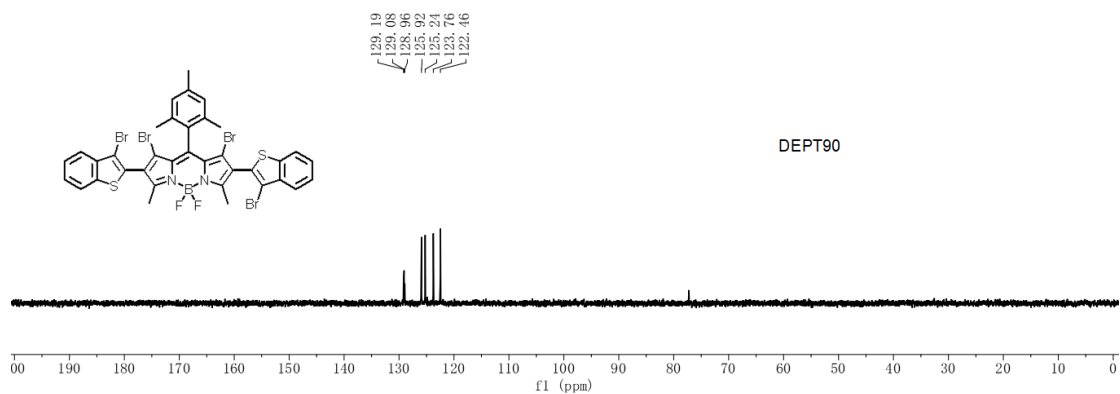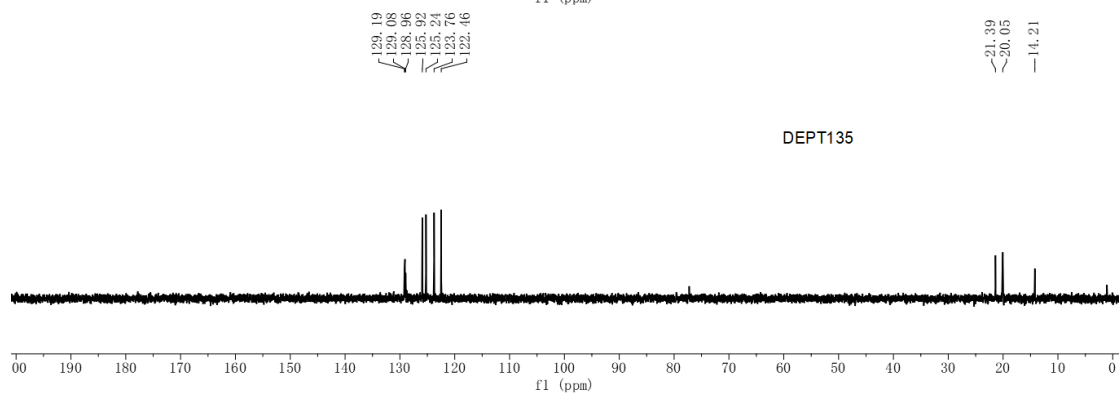

## HRMS Spectrum of **7a**

H-7a #570 RT: 3.18 AV: 1 NL: 4.81E6  
T: FTMS - p ESI Full ms [250.0000-1200.0000]

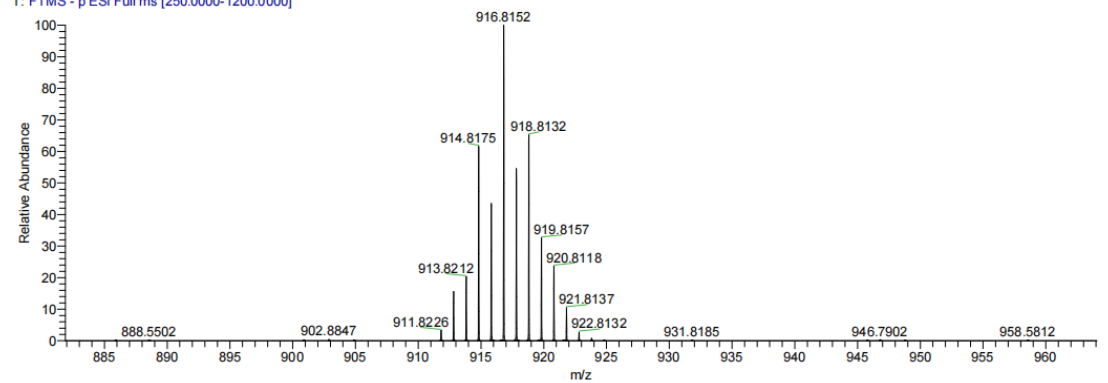



$^1\text{H}$  NMR spectrum of **8a** ( $\text{CDCl}_3$ , 400 MHz)

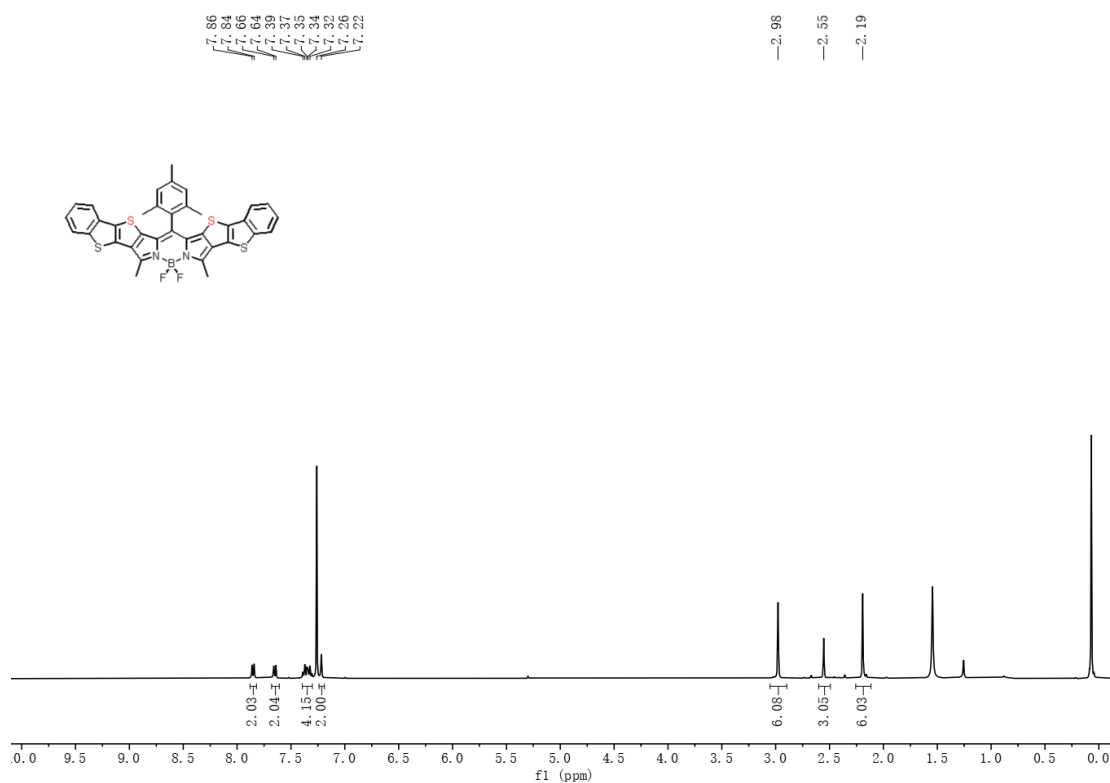

$^{13}\text{C}$  NMR Spectrum of **8a** ( $\text{CDCl}_3$ , 101 MHz)

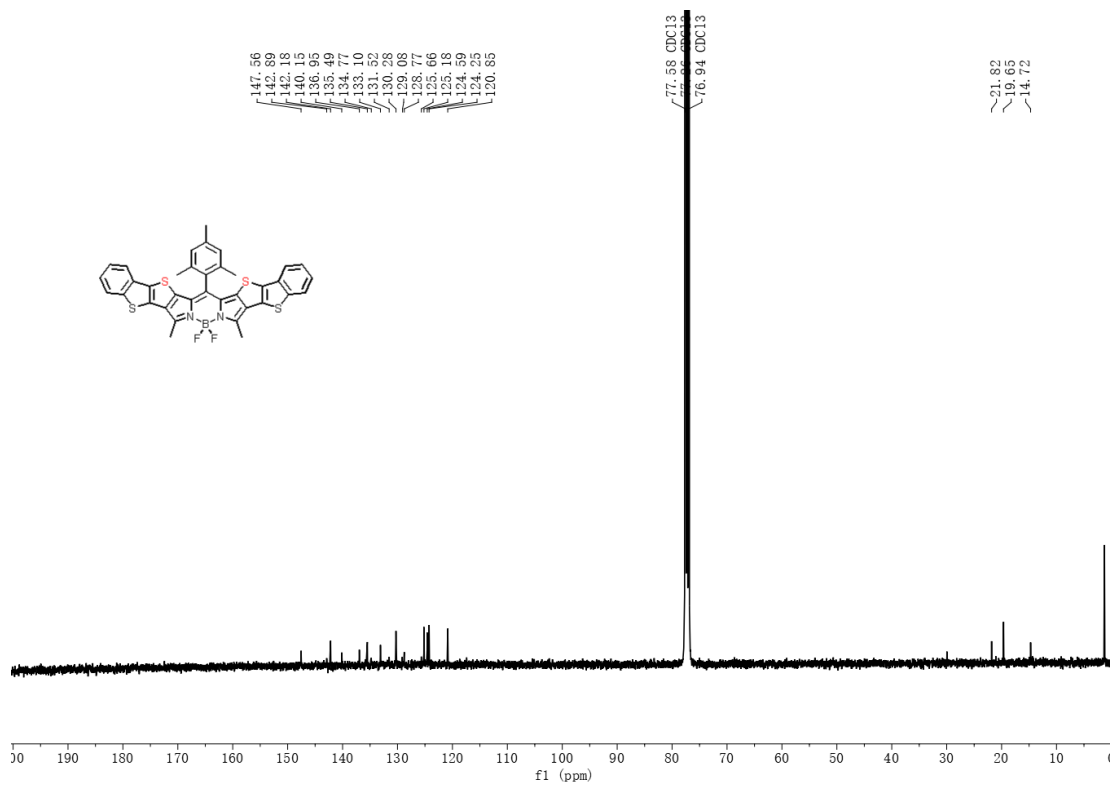

## DEPT Spectrum of **8a** (CDCl<sub>3</sub>, 101 MHz)

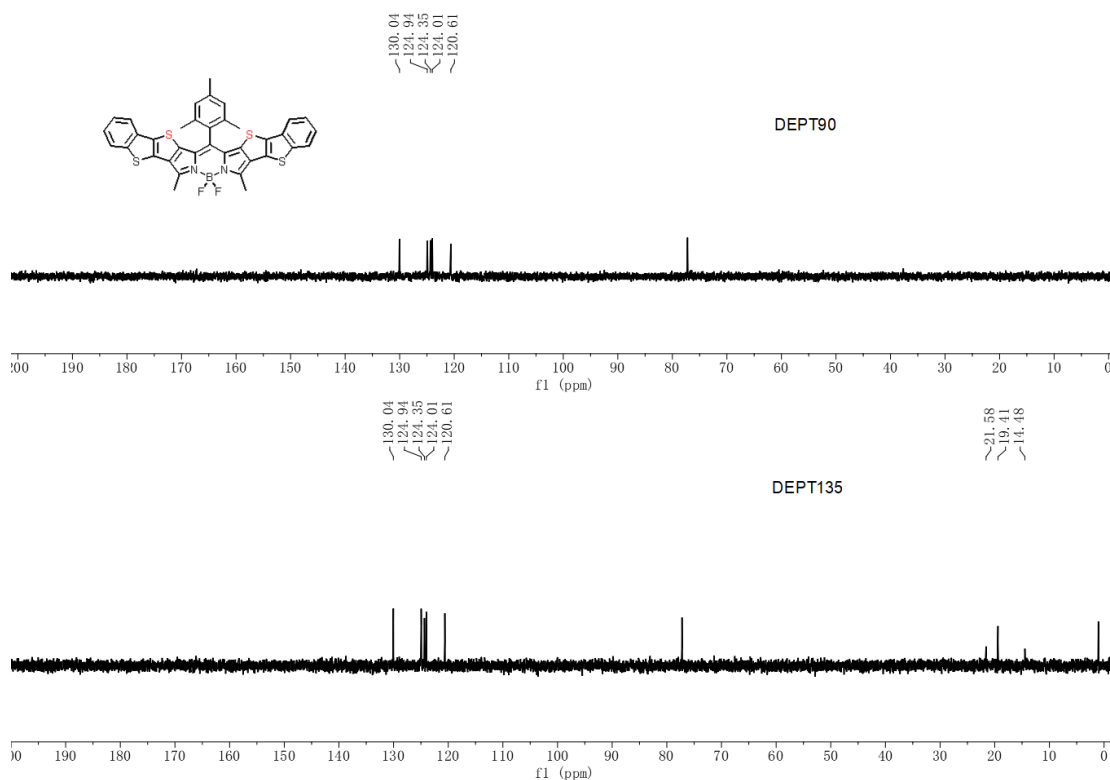

## HRMS Spectrum of **8a**

H-8a#761 RT: 4.27 AV: 1 NL: 1.09E7  
T: FTMS + p ESI Full ms [250.0000-1200.0000]

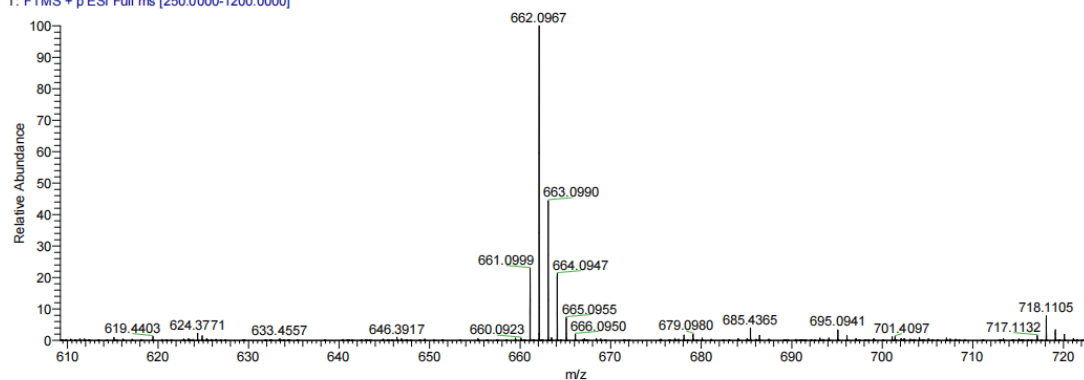

H-8a#761 RT: 4.27  
T: FTMS + p ESI Full ms [250.0000-1200.0000]  
m/z = 609.2071-723.1324

| m/z      | Intensity  | Relative | Theo. Mass | Delta (ppm) | Composition                                                                    |
|----------|------------|----------|------------|-------------|--------------------------------------------------------------------------------|
| 662.0967 | 11351029.0 | 100.00   | 662.0956   | 1.06        | C <sub>36</sub> H <sub>25</sub> N <sub>2</sub> B F <sub>2</sub> S <sub>4</sub> |

$^1\text{H}$  NMR spectrum of **1b** ( $\text{CDCl}_3$ , 400 MHz)

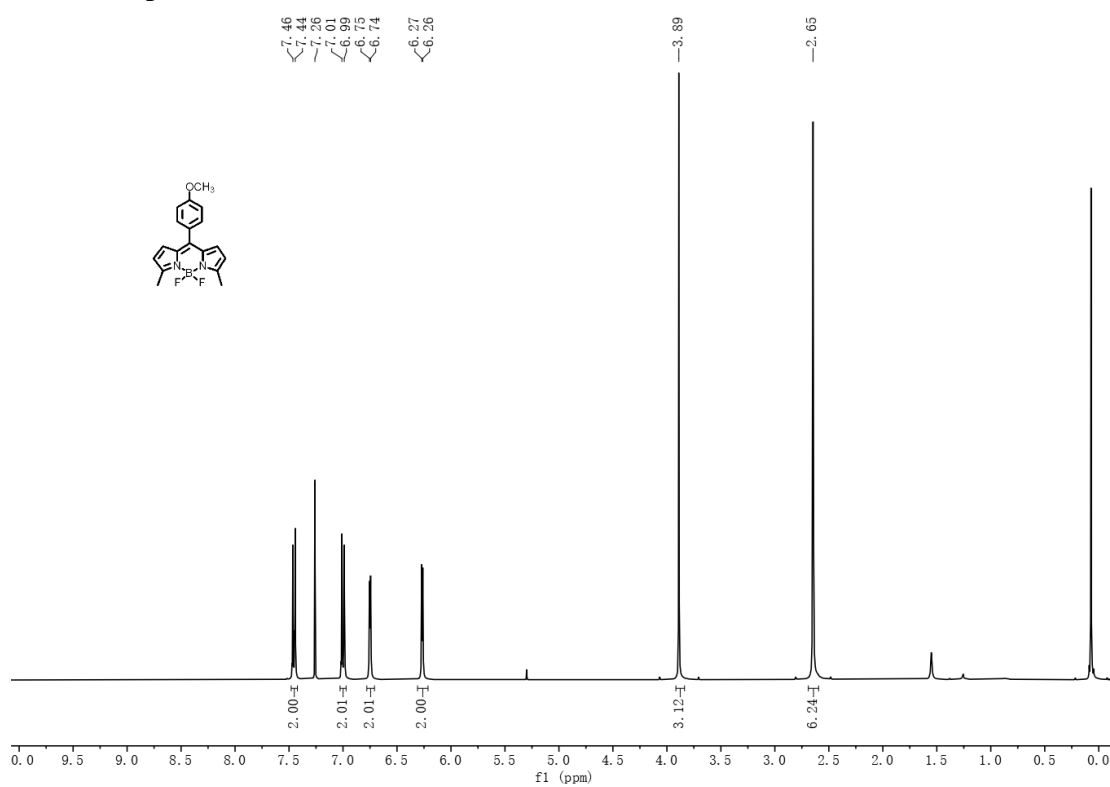

$^1\text{H}$  NMR spectrum of **2b** ( $\text{CDCl}_3$ , 400 MHz)

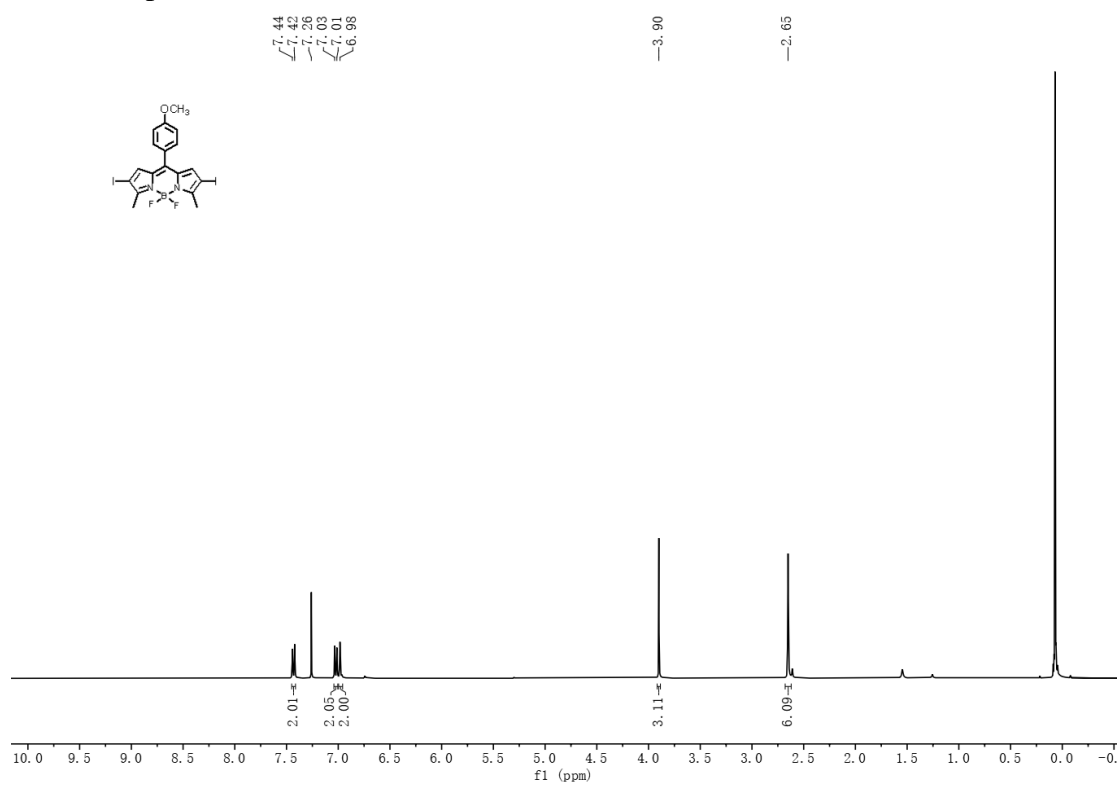

### <sup>13</sup>C NMR Spectrum of **2b** (CDCl<sub>3</sub>, 101 MHz)

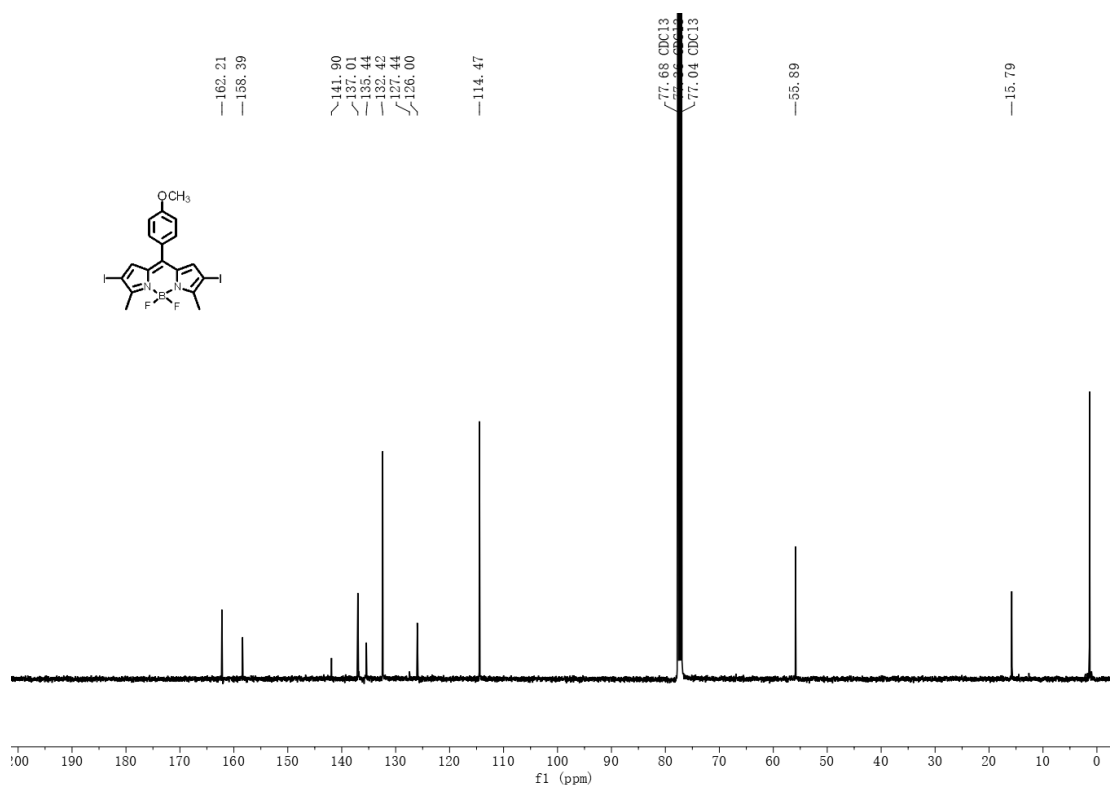

### HRMS Spectrum of **2b**

H-2b#245 RT: 1.38 AV: 1 NL: 1.54E6  
T: FTMS + p ESI Full ms [250.0000-1200.0000]

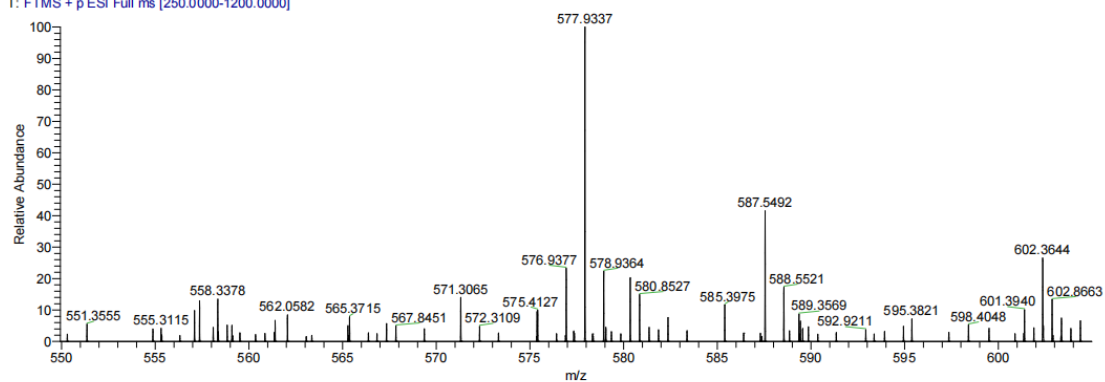

H-2b#245 RT: 1.38  
T: FTMS + p ESI Full ms [250.0000-1200.0000]

m/z = 549.9321-604.9827

| m/z      | Intensity | Relative | Theo. Mass | Delta (ppm) | Composition                                                                      |
|----------|-----------|----------|------------|-------------|----------------------------------------------------------------------------------|
| 577.9337 | 1606000.5 | 100.00   | 577.9329   | 0.72        | C <sub>18</sub> H <sub>15</sub> O N <sub>2</sub> B F <sub>2</sub> I <sub>2</sub> |

$^1\text{H}$  NMR spectrum of **3b** ( $\text{CDCl}_3$ , 400 MHz)

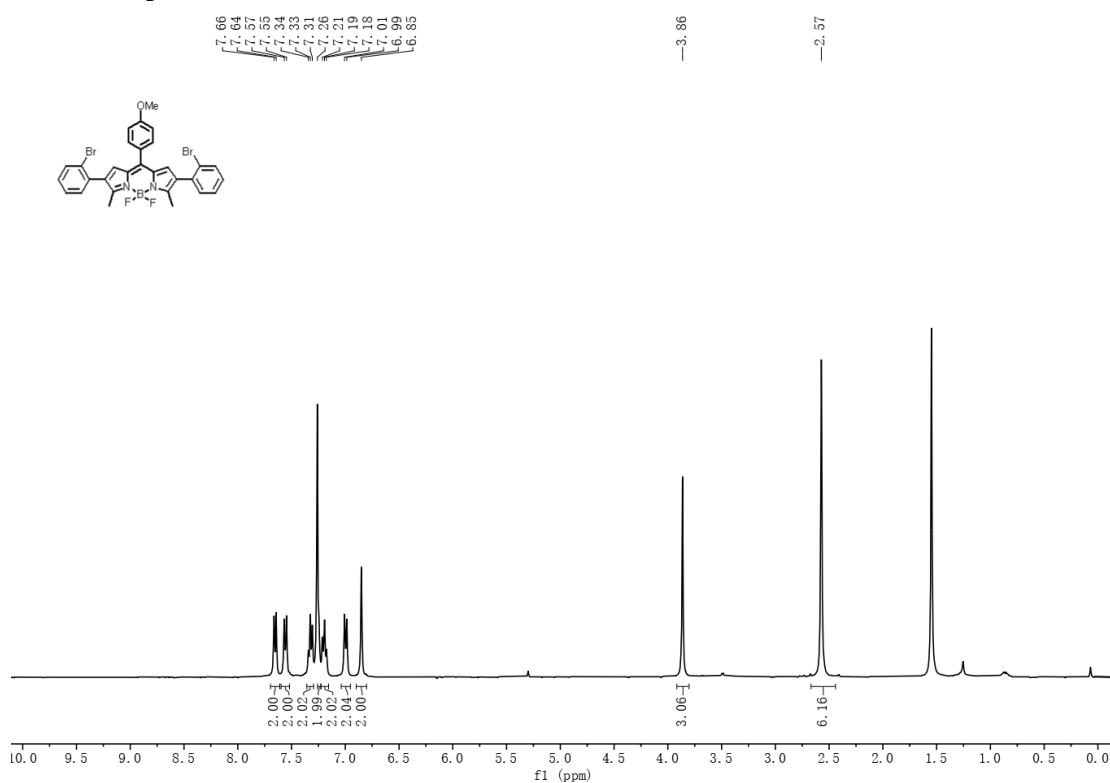

$^{13}\text{C}$  NMR Spectrum of **3b** ( $\text{CDCl}_3$ , 101 MHz)

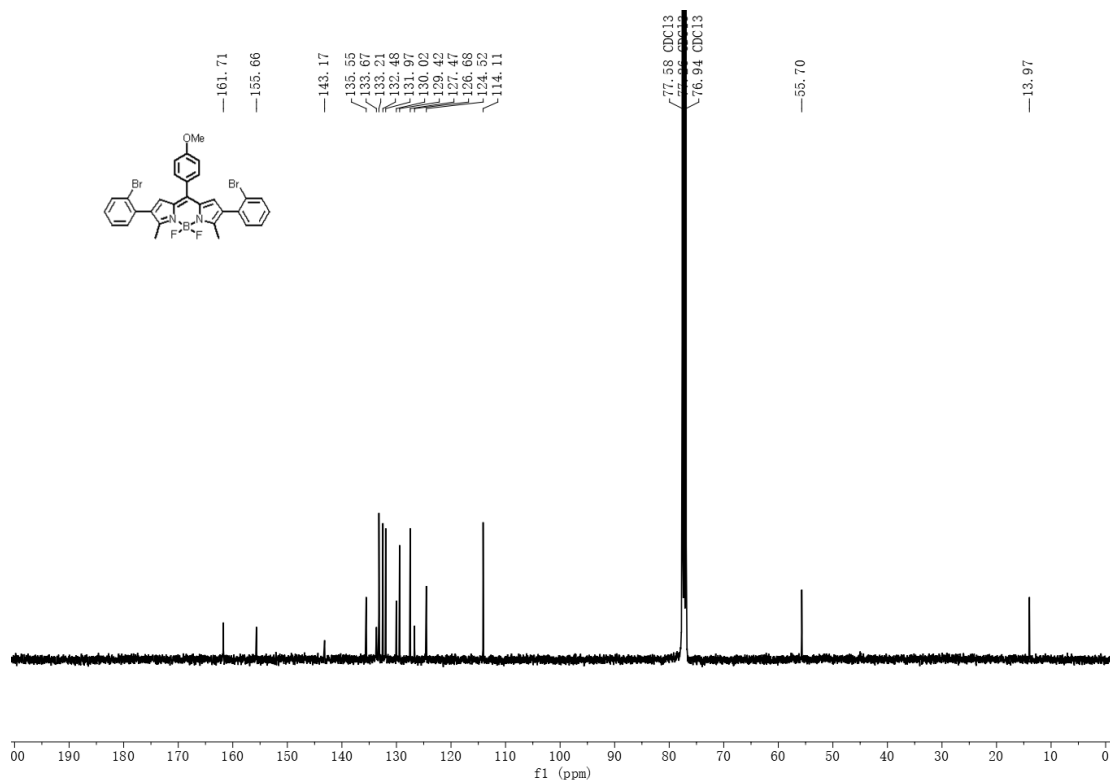

### DEPT Spectrum of **3b** (CDCl<sub>3</sub>, 101 MHz)

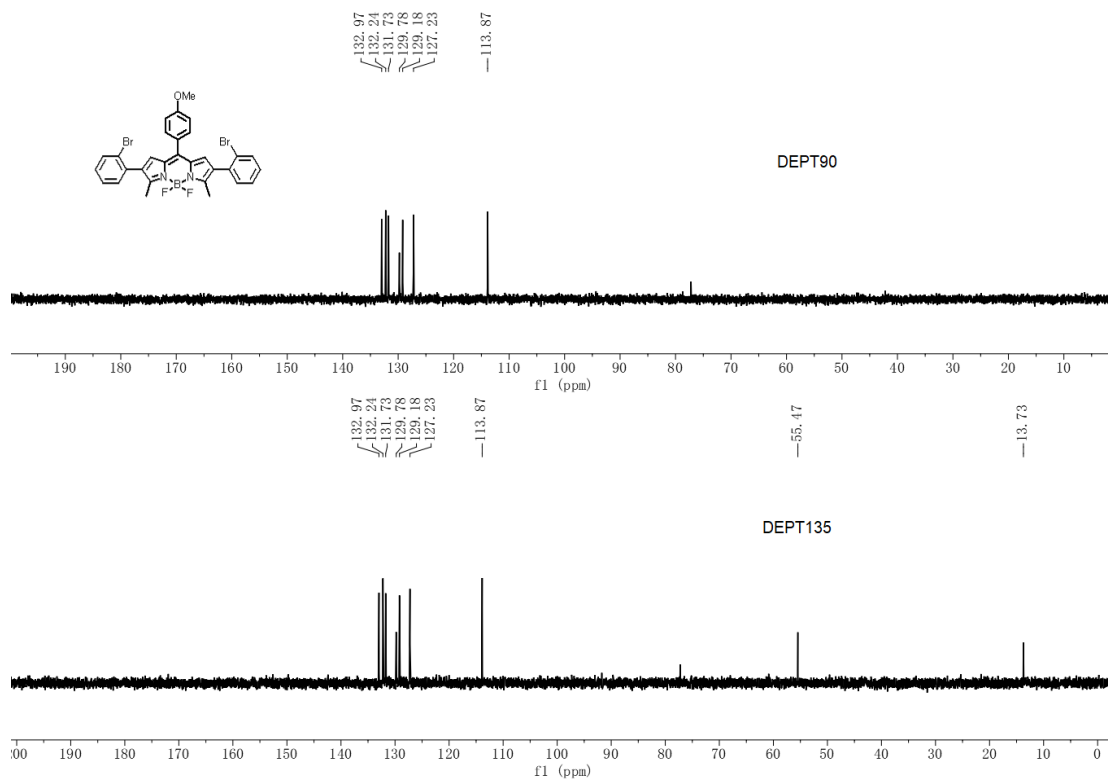

### HRMS Spectrum of **3b**

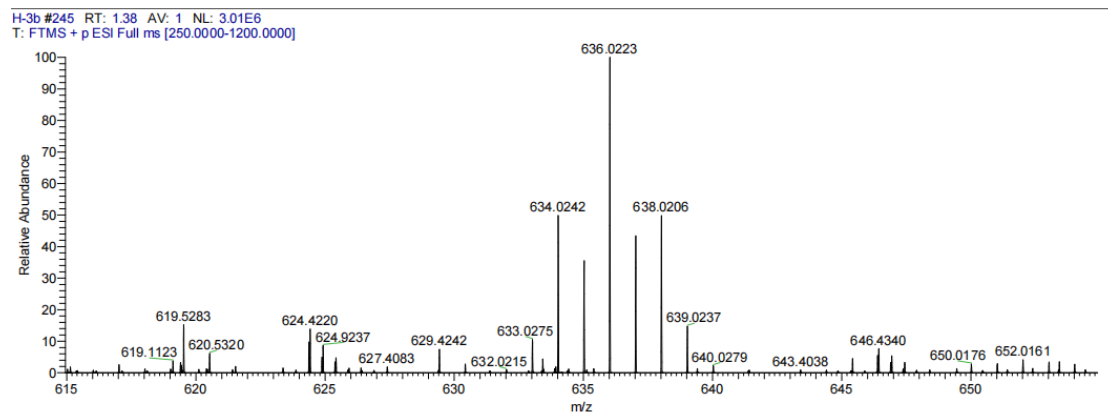

$^1\text{H}$  NMR spectrum of **4b** ( $\text{CDCl}_3$ , 400 MHz)

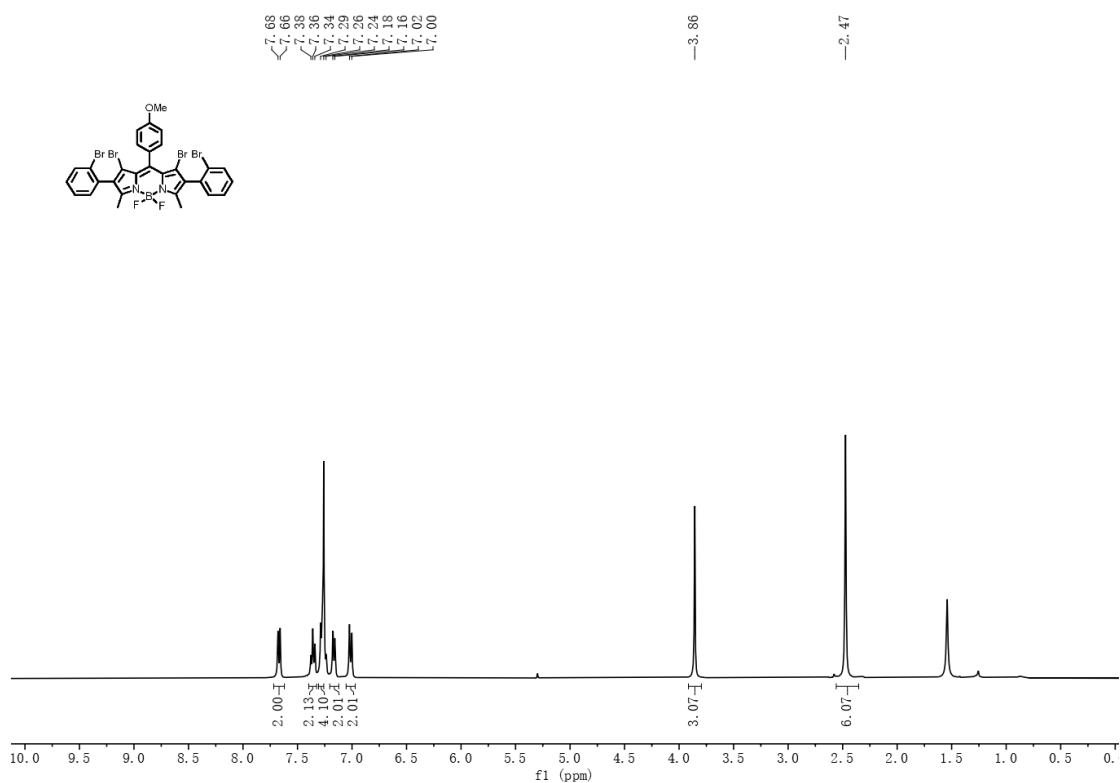

$^{13}\text{C}$  NMR Spectrum of **4b** ( $\text{CDCl}_3$ , 101 MHz)

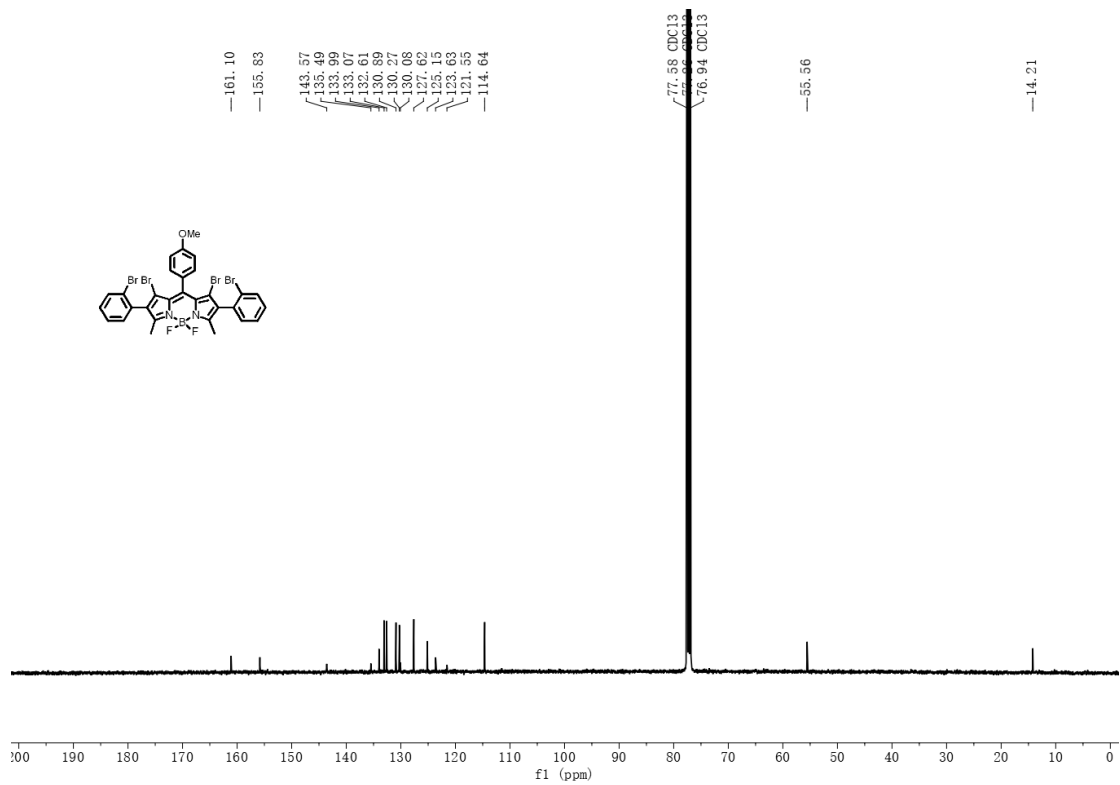

## DEPT Spectrum of **4b** (CDCl<sub>3</sub>, 101 MHz)

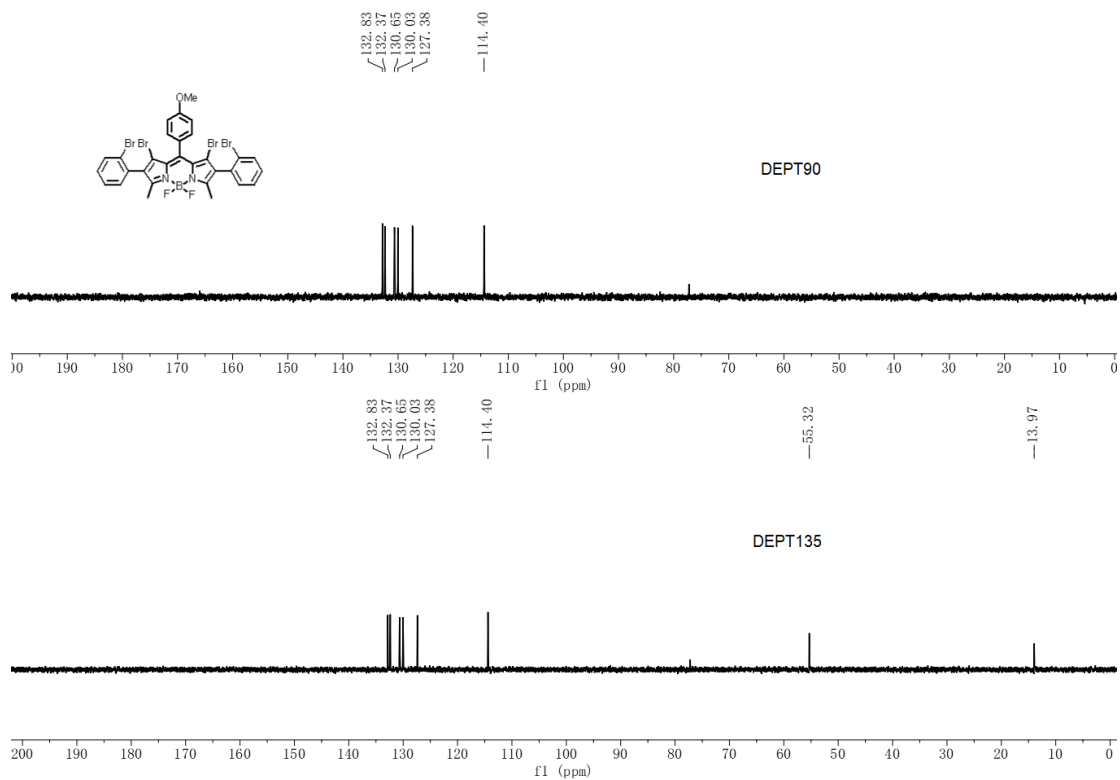

## HRMS Spectrum of **4b**

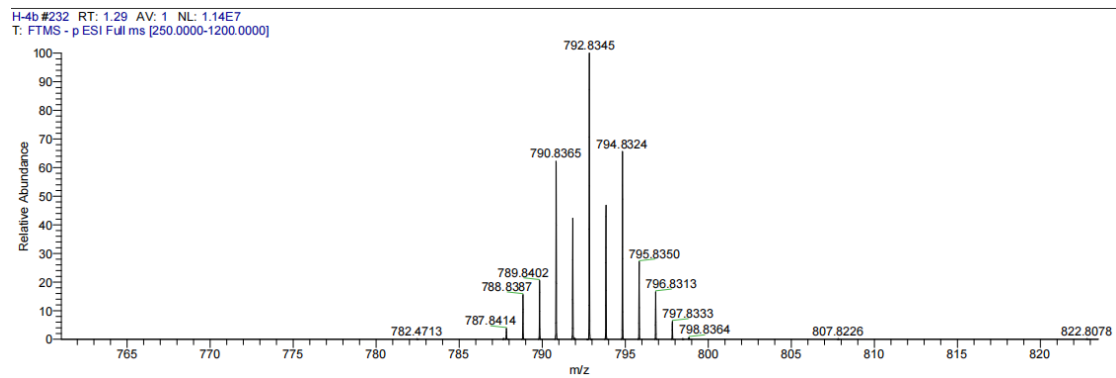



<sup>1</sup>H NMR spectrum of **5b** (CDCl<sub>3</sub>, 400 MHz)

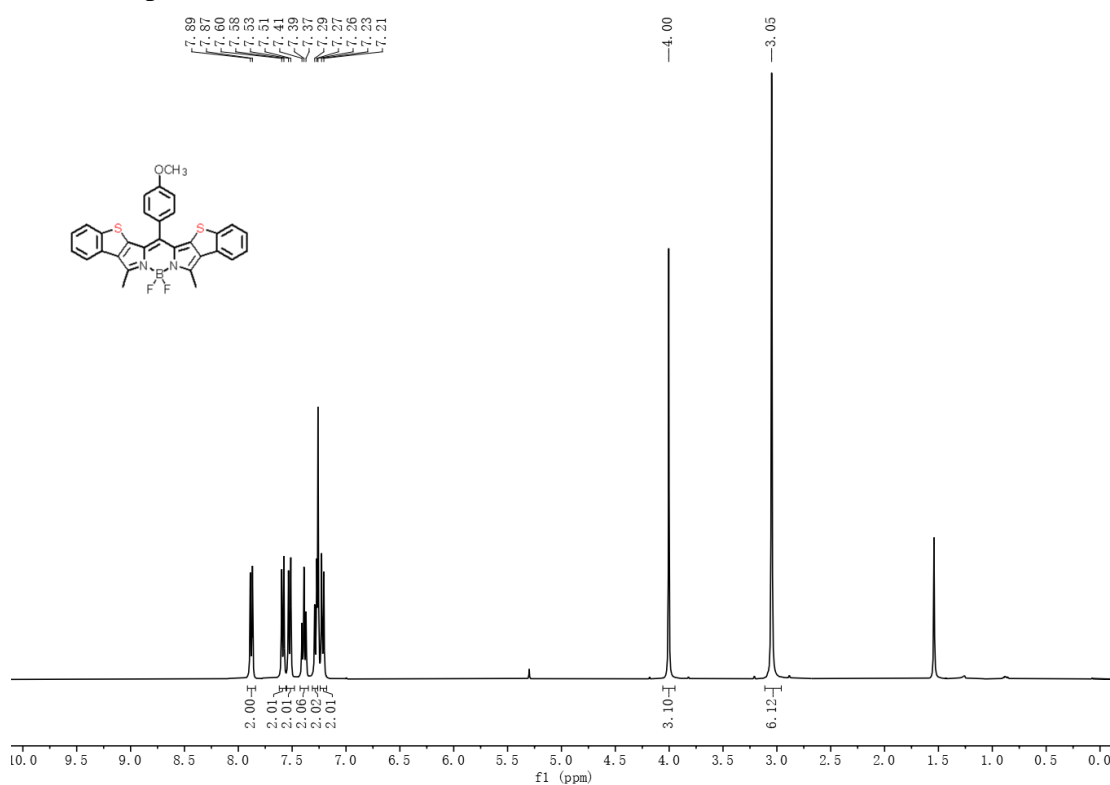

<sup>13</sup>C NMR Spectrum of **5b** (CDCl<sub>3</sub>, 101 MHz)

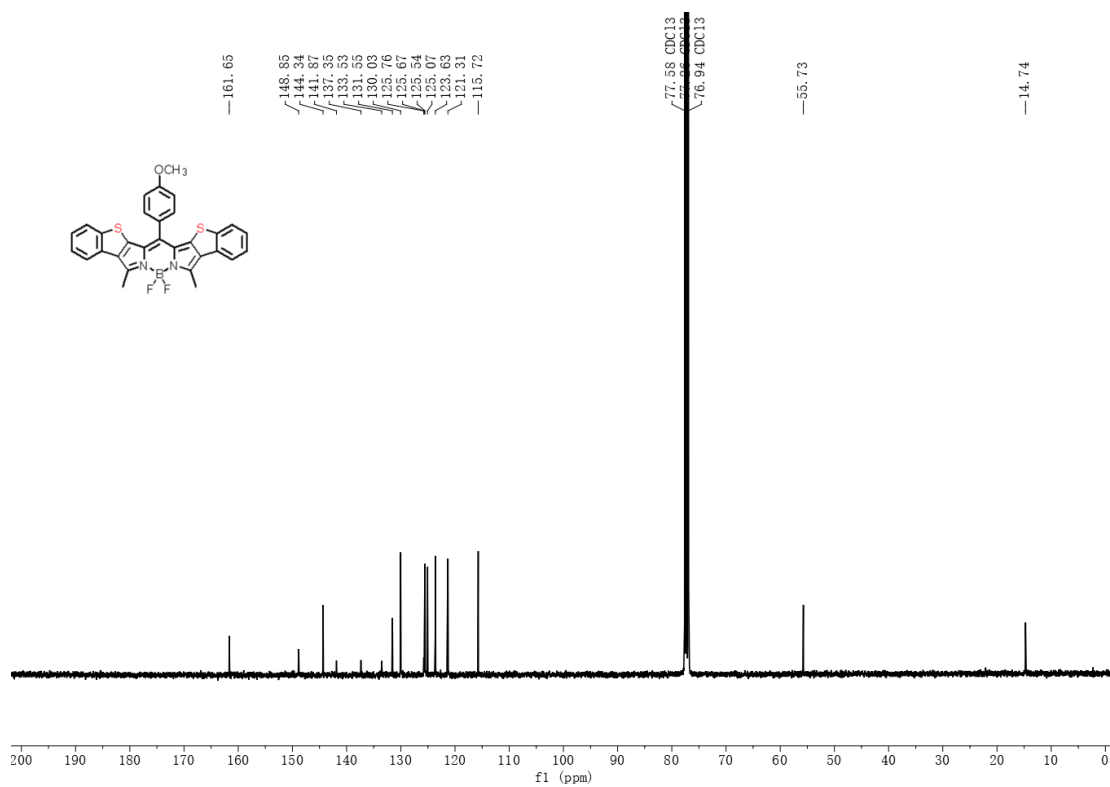

## DEPT Spectrum of **5b** (CDCl<sub>3</sub>, 101 MHz)

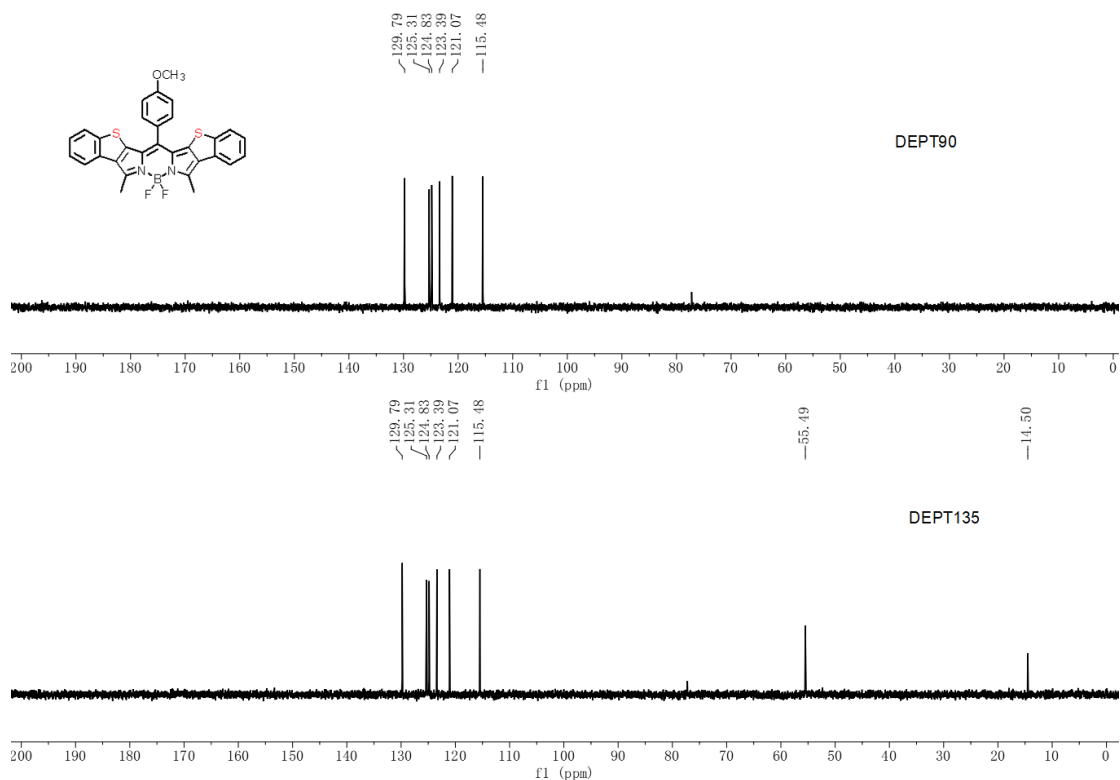

## HRMS Spectrum of **5b**

H-5b #267 RT: 1.49 AV: 1 NL: 1.04E7  
T: FTMS + p ESI Full ms [250.0000-1200.0000]

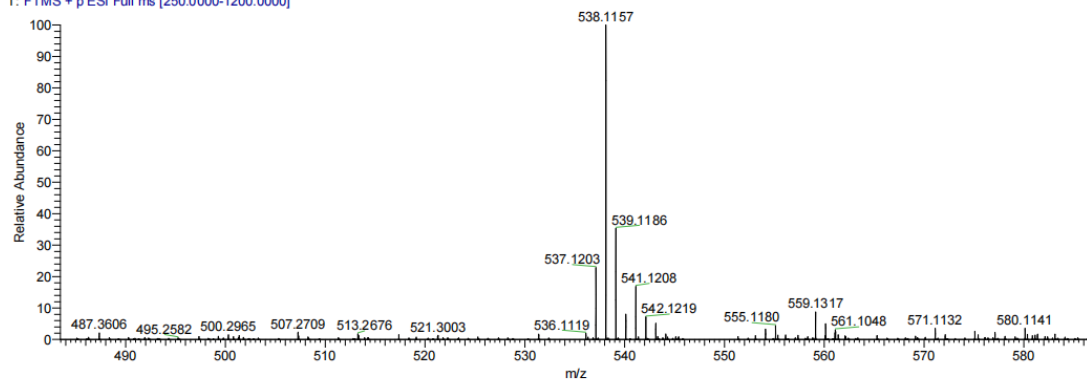

H-5b#267 RT: 1.49  
T: FTMS + p ESI Full ms [250.0000-1200.0000]

m/z = 483.4535-586.7955

| m/z      | Intensity  | Relative | Theo. Mass | Delta (ppm) | Composition                                                                                  |
|----------|------------|----------|------------|-------------|----------------------------------------------------------------------------------------------|
| 538.1157 | 10495452.0 | 100.00   | 538.1151   | 0.63        | C <sub>30</sub> H <sub>21</sub> ON <sub>2</sub> B <sub>2</sub> F <sub>2</sub> S <sub>2</sub> |

H NMR spectrum of **6b** (CDCl<sub>3</sub>, 400 MHz)

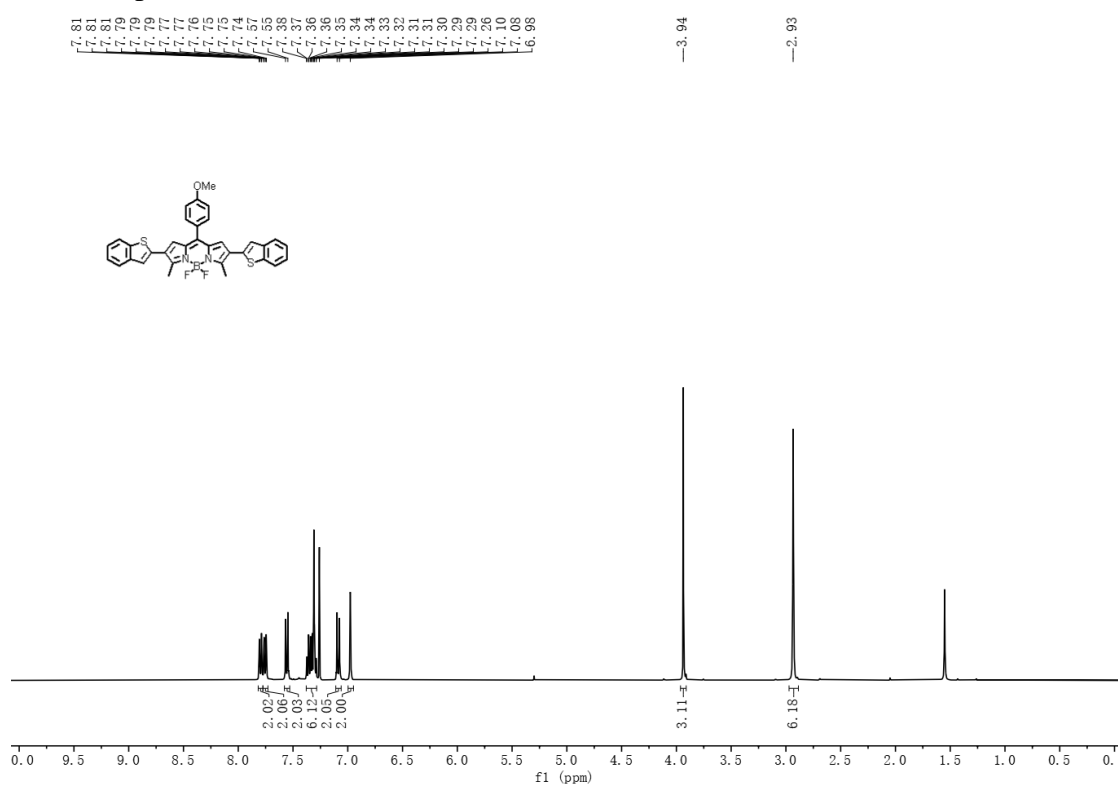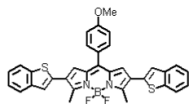

<sup>13</sup>C NMR Spectrum of **6b** (CDCl<sub>3</sub>, 101 MHz)

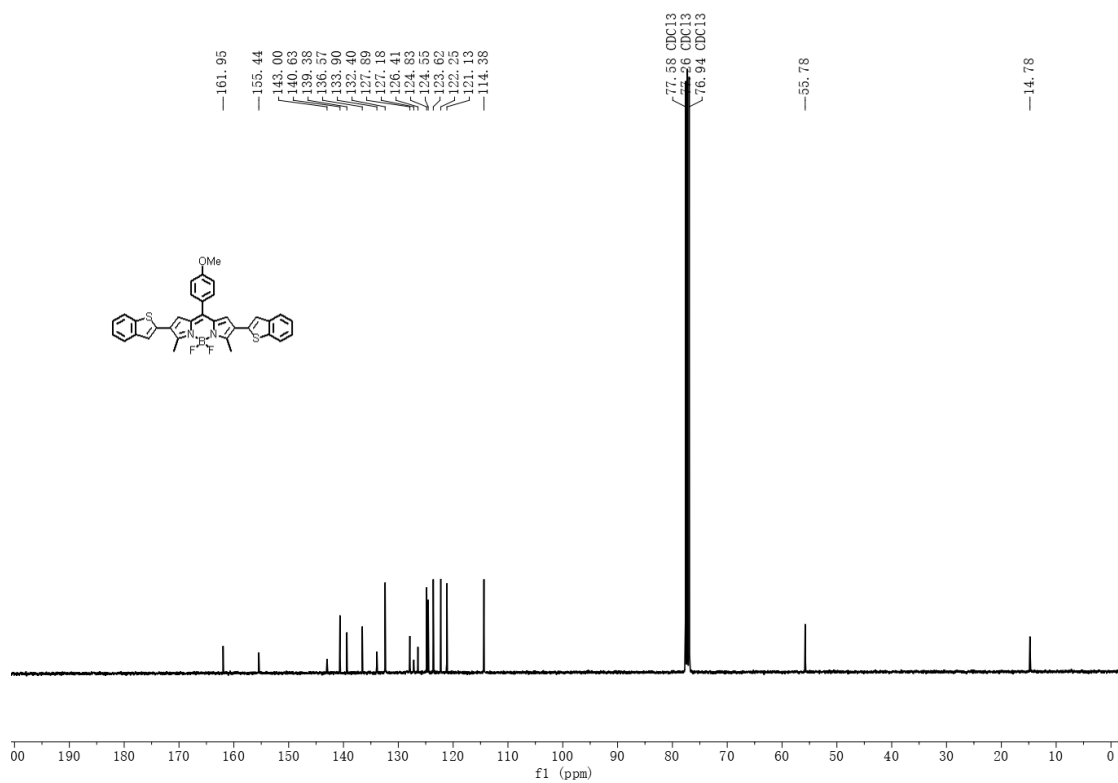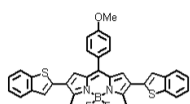

## DEPT Spectrum of **6b** (CDCl<sub>3</sub>, 101 MHz)

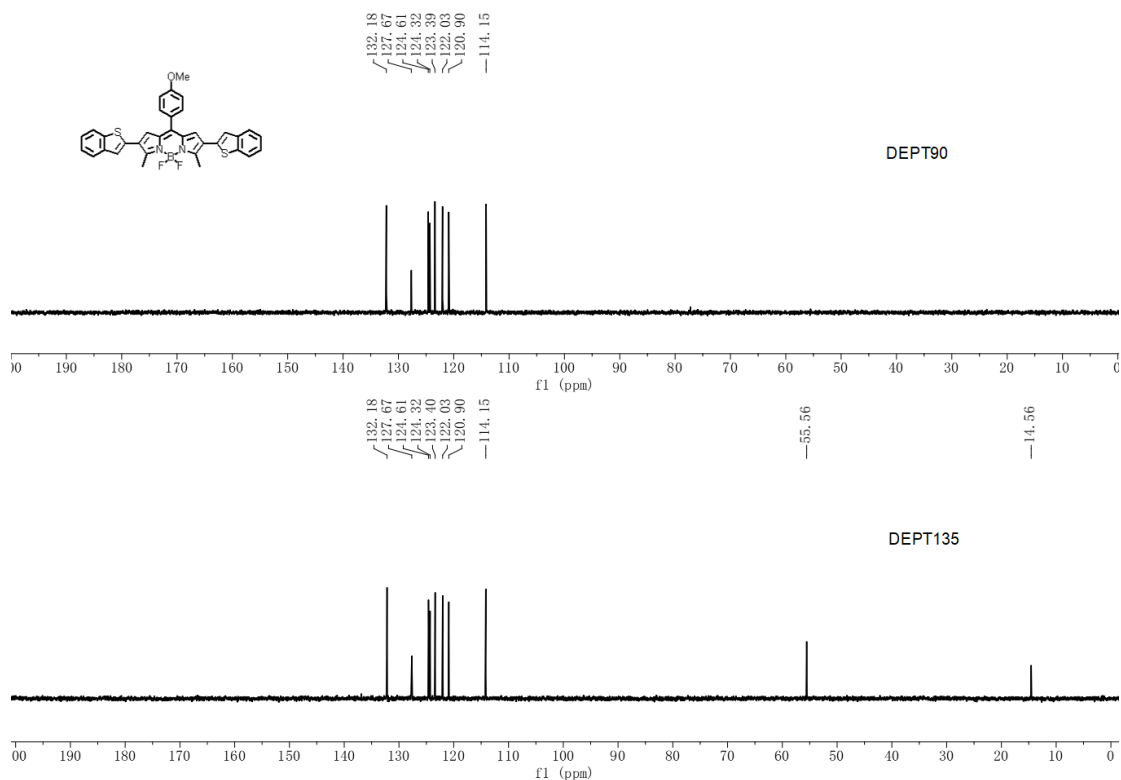

## HRMS Spectrum of **6b**

H-6b#315 RT: 1.75 AV: 1 NL: 2.69E6  
T: FTMS + p ESI Full ms [250.0000-1200.0000]

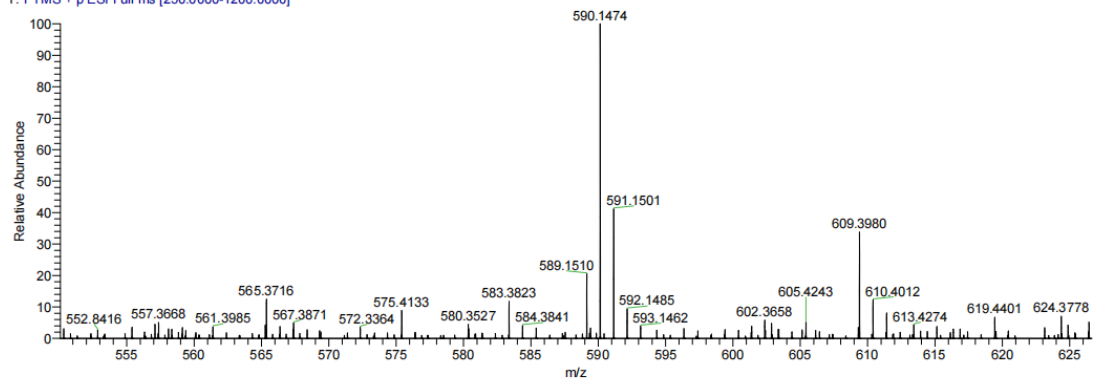

H-6b#315 RT: 1.75  
T: FTMS + p ESI Full ms [250.0000-1200.0000]

m/z = 550.0655-626.6383

| m/z      | Intensity | Relative | Theo. Mass | Delta (ppm) | Composition                                                                                                |
|----------|-----------|----------|------------|-------------|------------------------------------------------------------------------------------------------------------|
| 590.1474 | 2745336.0 | 100.00   | 590.1464   | 1.01        | C <sub>34</sub> H <sub>25</sub> O <sub>2</sub> N <sub>2</sub> B <sub>2</sub> F <sub>2</sub> S <sub>2</sub> |

<sup>1</sup>H NMR spectrum of **7b** (CDCl<sub>3</sub>, 400 MHz)

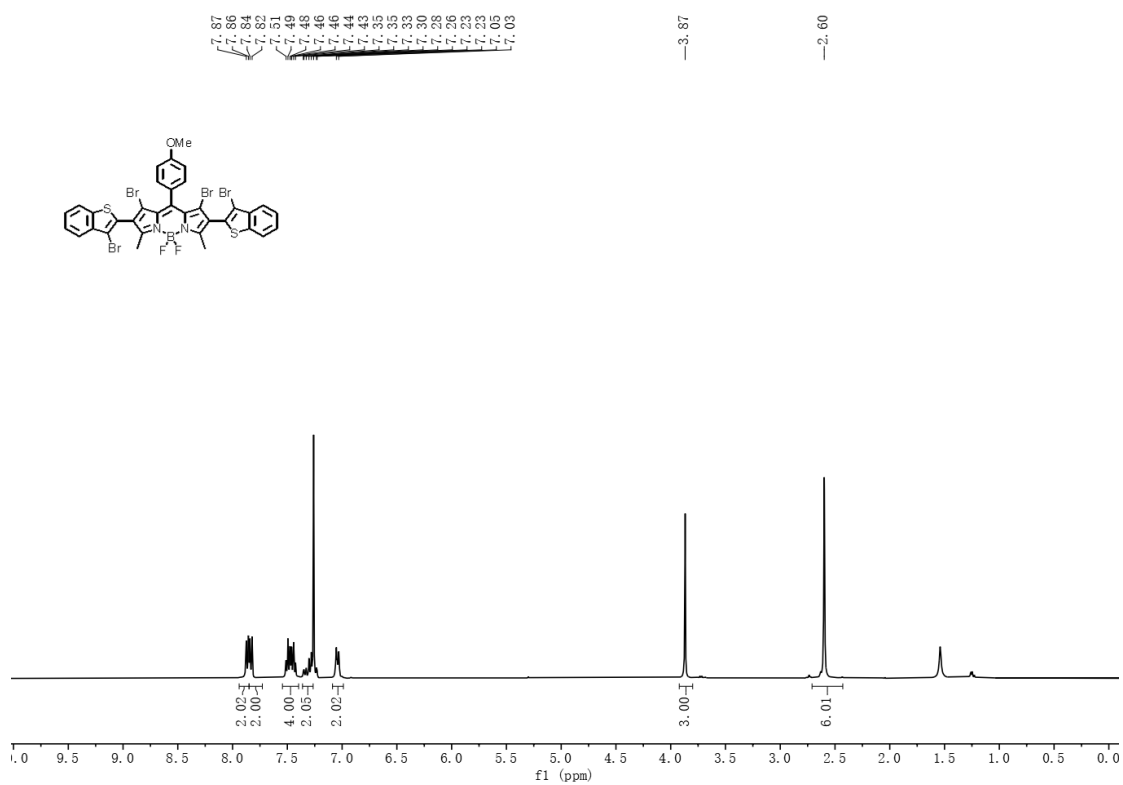

<sup>13</sup>C NMR Spectrum of **7b** (CDCl<sub>3</sub>, 101 MHz)

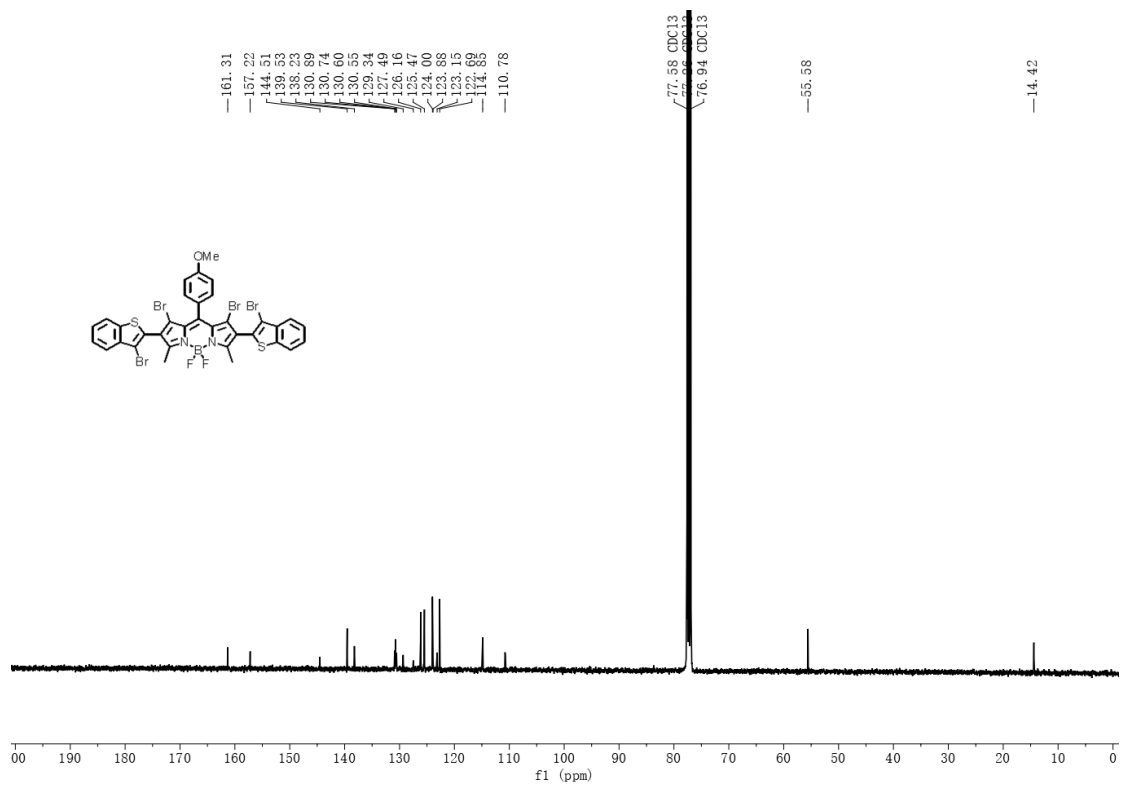

## DEPT Spectrum of **7b** (CDCl<sub>3</sub>, 101 MHz)

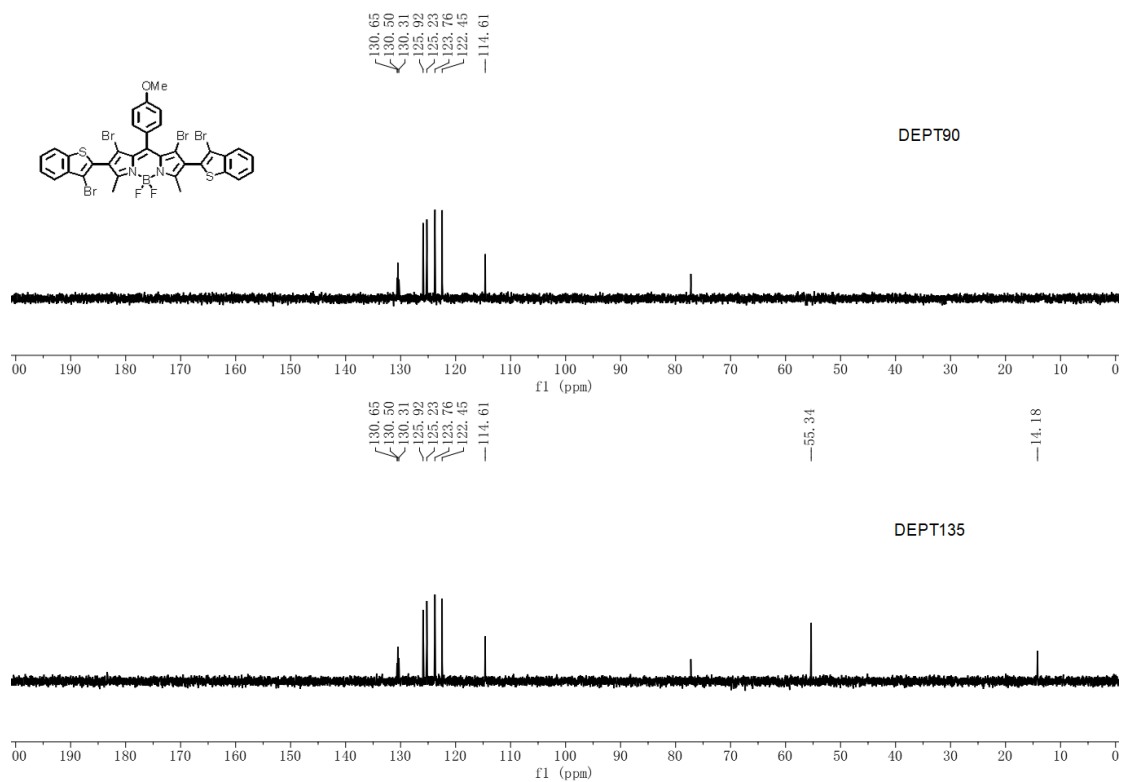

## HRMS Spectrum of **7b**

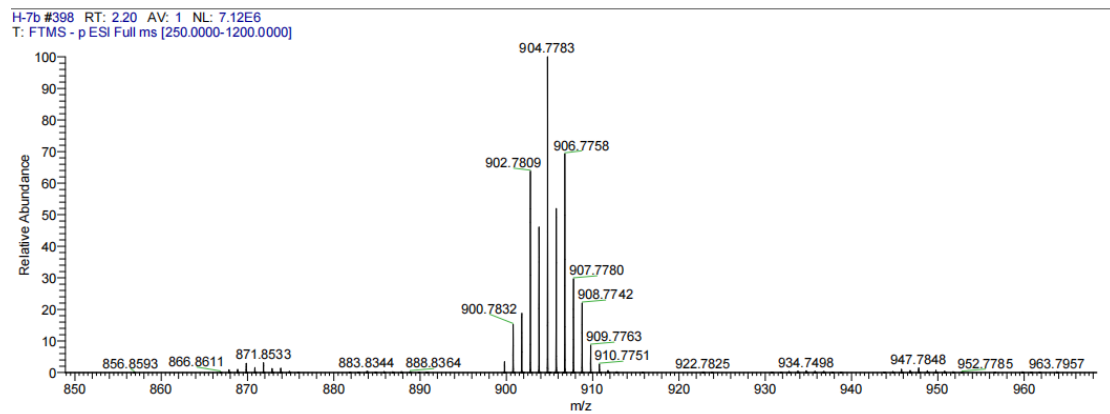

$^1\text{H}$  NMR spectrum of **8b** ( $\text{CD}_2\text{Cl}_2$ , 400 MHz)

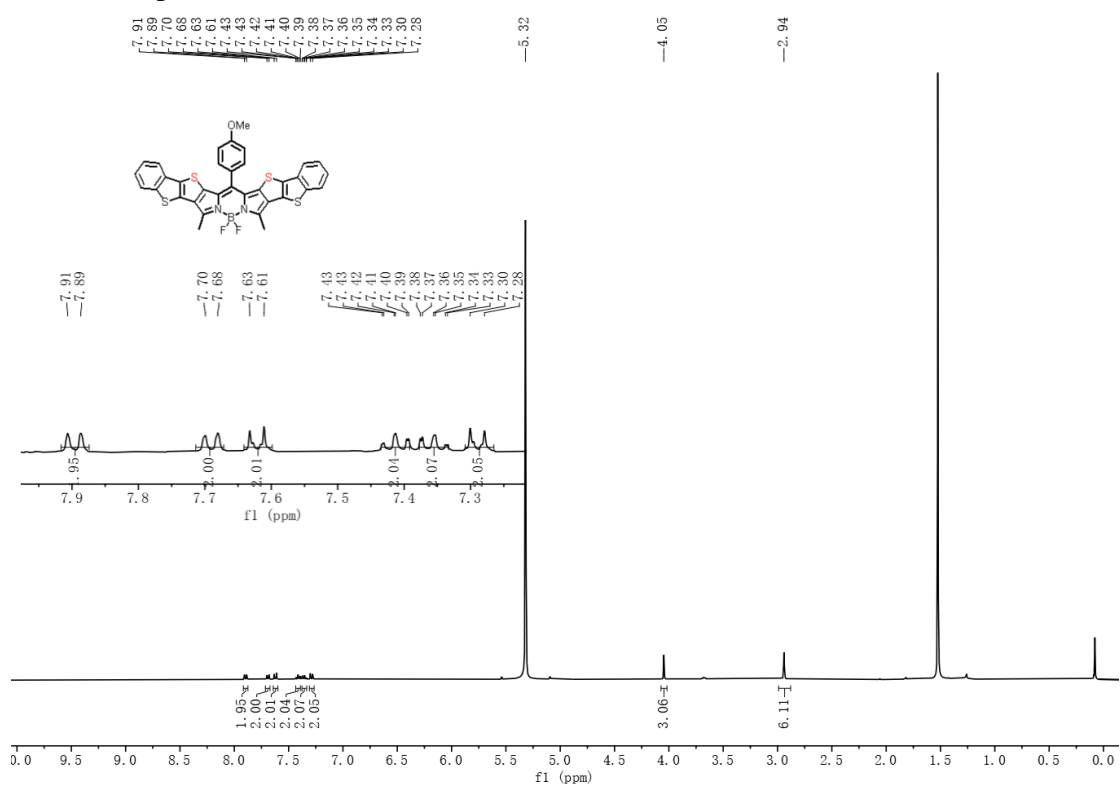

$^{13}\text{C}$  NMR Spectrum of **8b** ( $\text{CDCl}_3$ , 101 MHz)

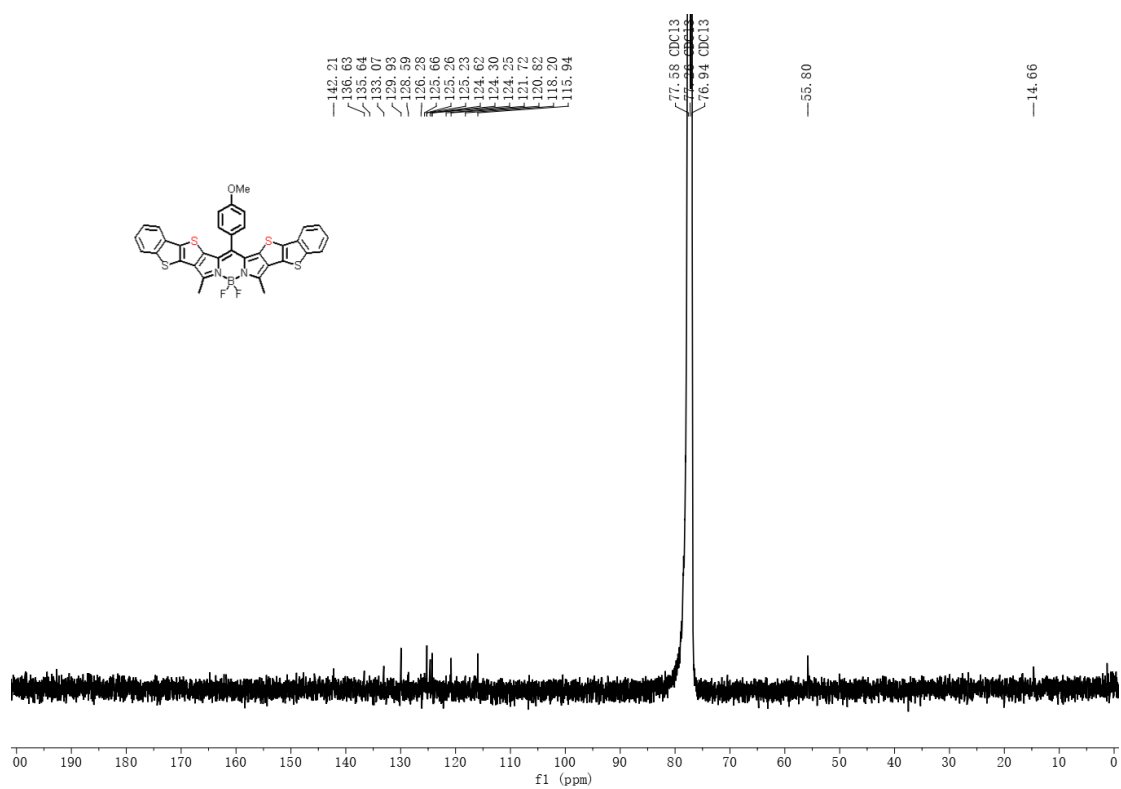

## DEPT Spectrum of **8b** (CDCl<sub>3</sub>, 101 MHz)

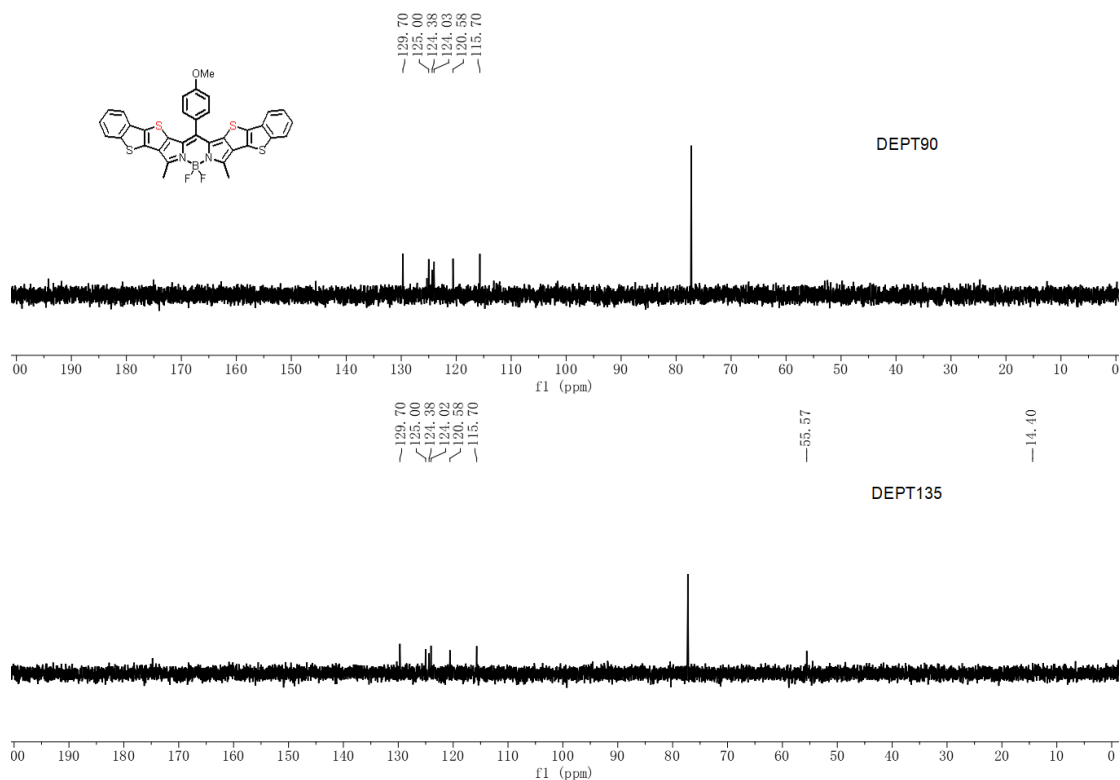

## HRMS Spectrum of **8b**

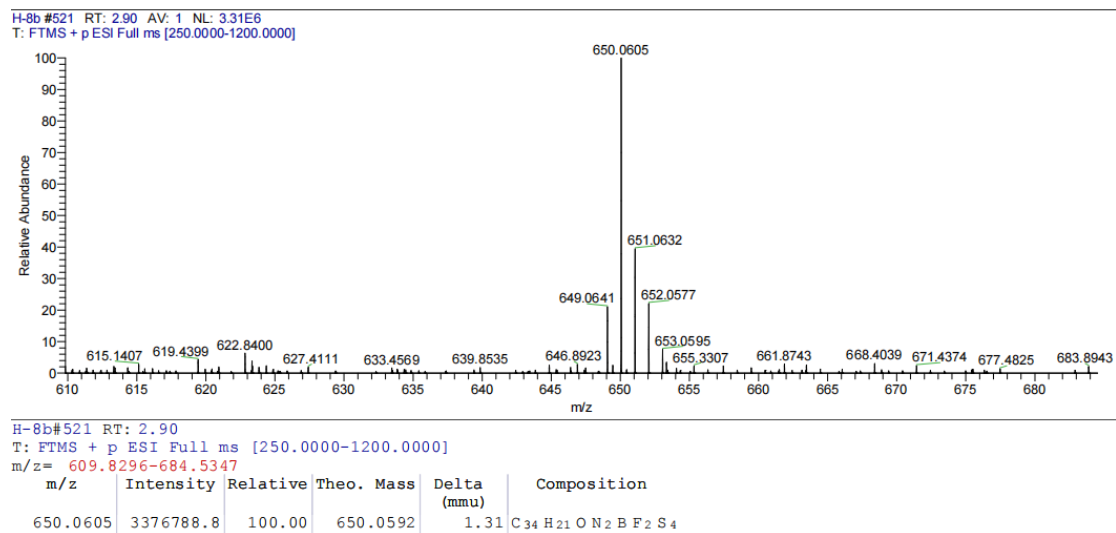



<sup>1</sup>H NMR spectrum of **1c** (CDCl<sub>3</sub>, 400 MHz)

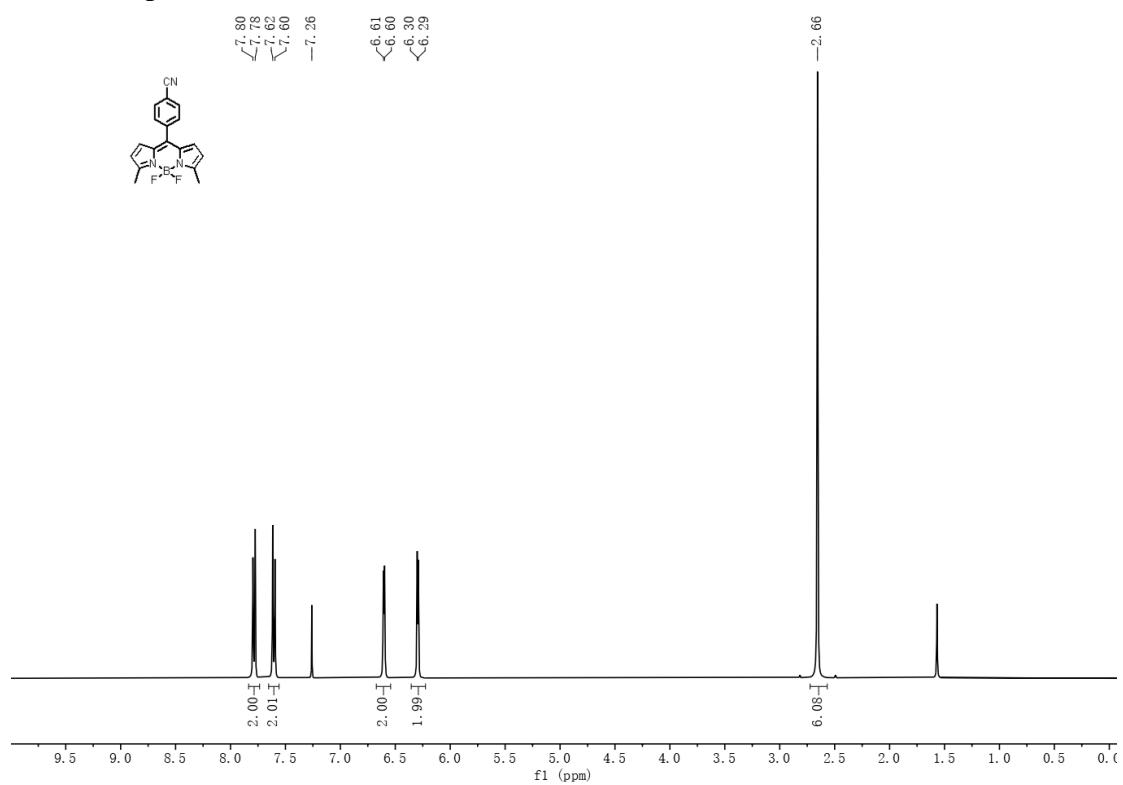

<sup>13</sup>C NMR Spectrum of **1c** (CDCl<sub>3</sub>, 101 MHz)

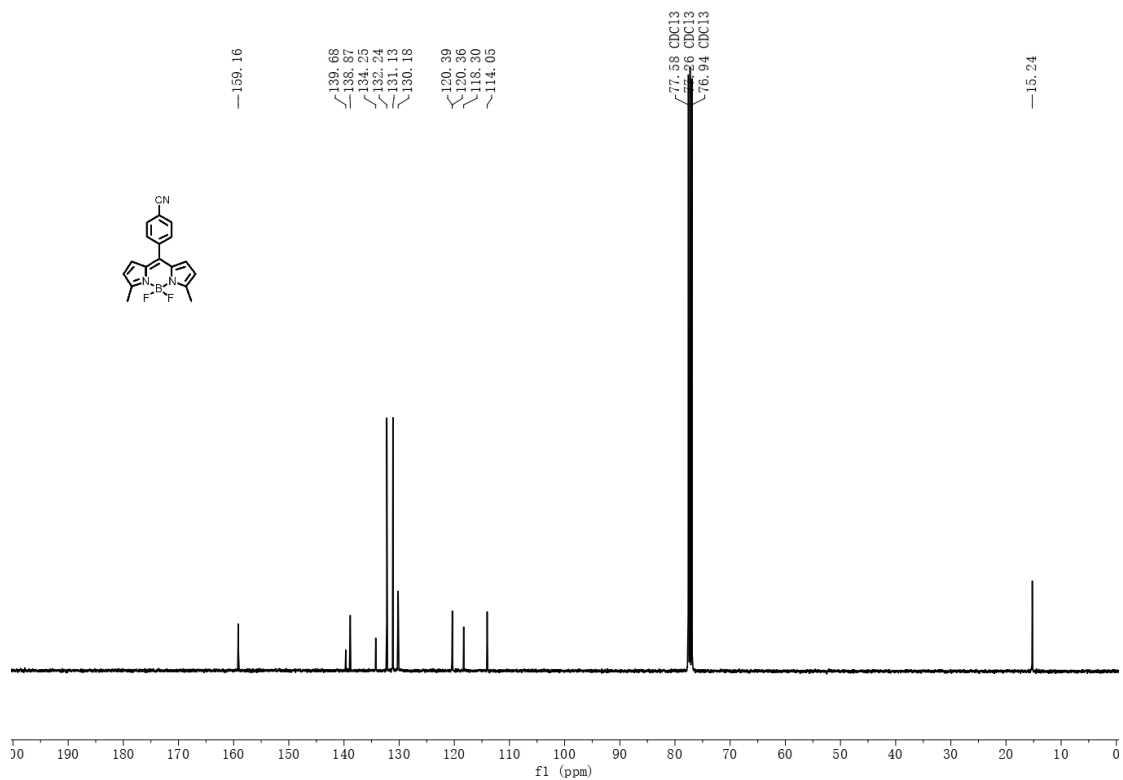

DEPT Spectrum of **1c** (CDCl<sub>3</sub>, 101 MHz)

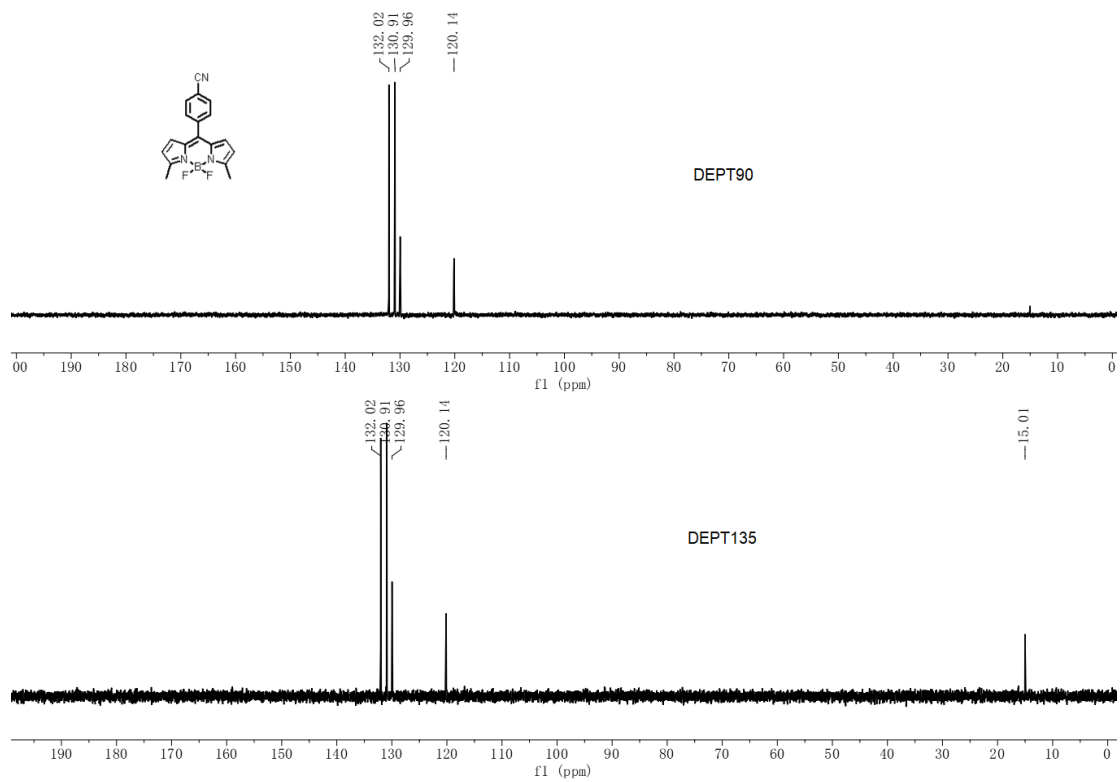

$^1\text{H}$  NMR spectrum of **2c** ( $\text{CDCl}_3$ , 400 MHz)

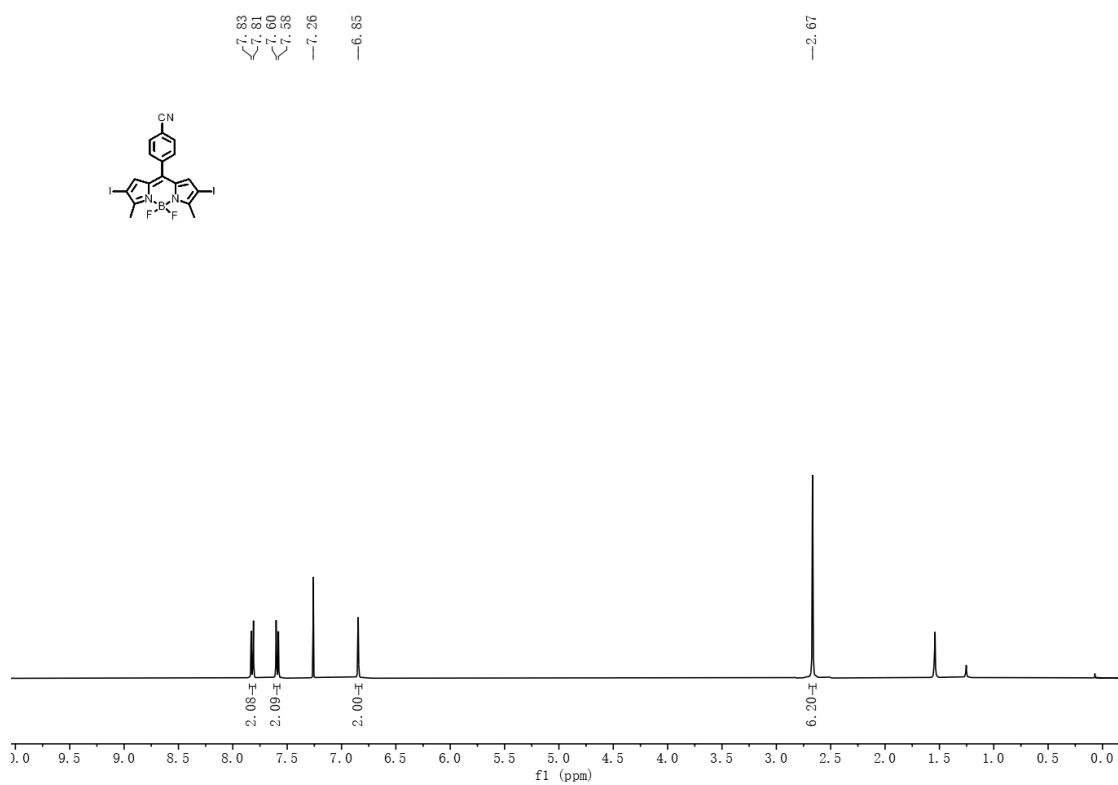

$^{13}\text{C}$  NMR Spectrum of **2c** ( $\text{CDCl}_3$ , 101 MHz)

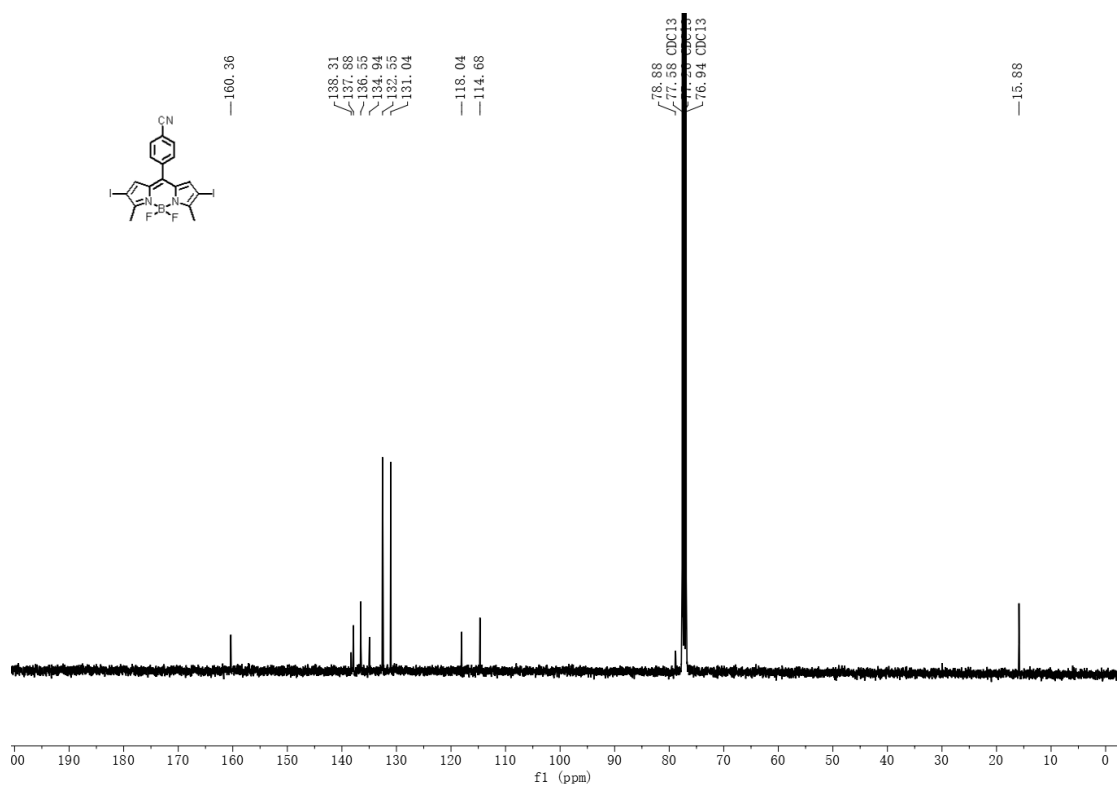

## DEPT Spectrum of **2c** (CDCl<sub>3</sub>, 101 MHz)

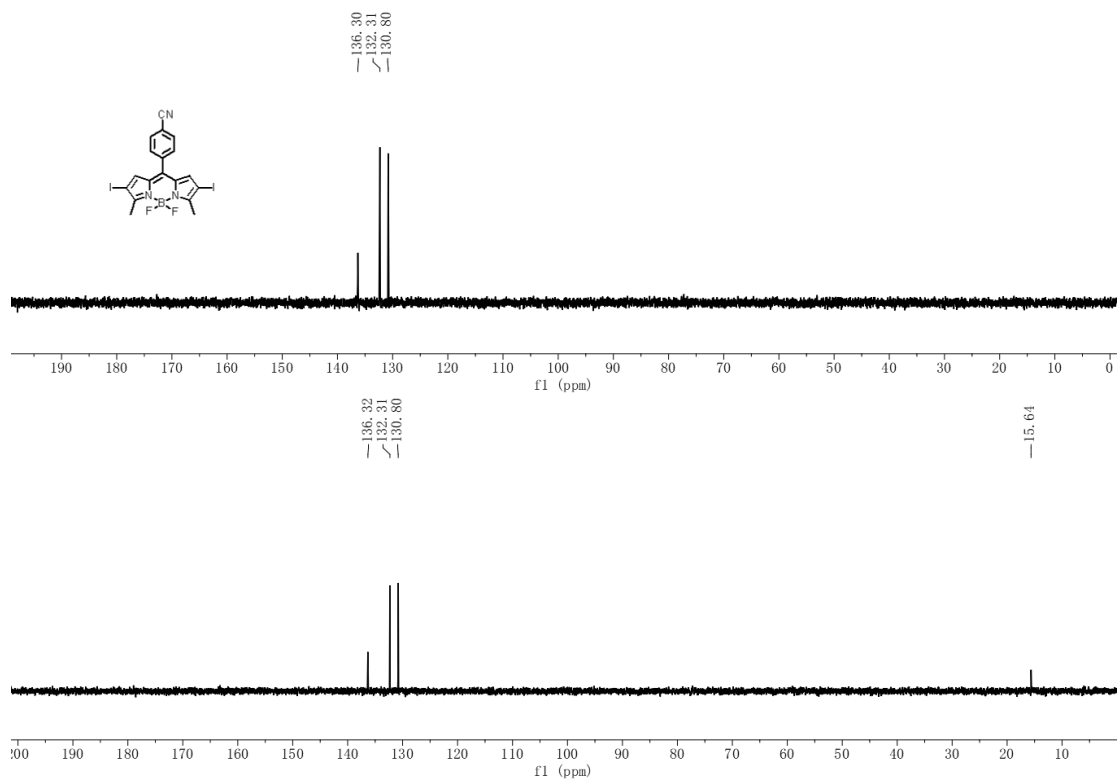

## HRMS Spectrum of **2c**

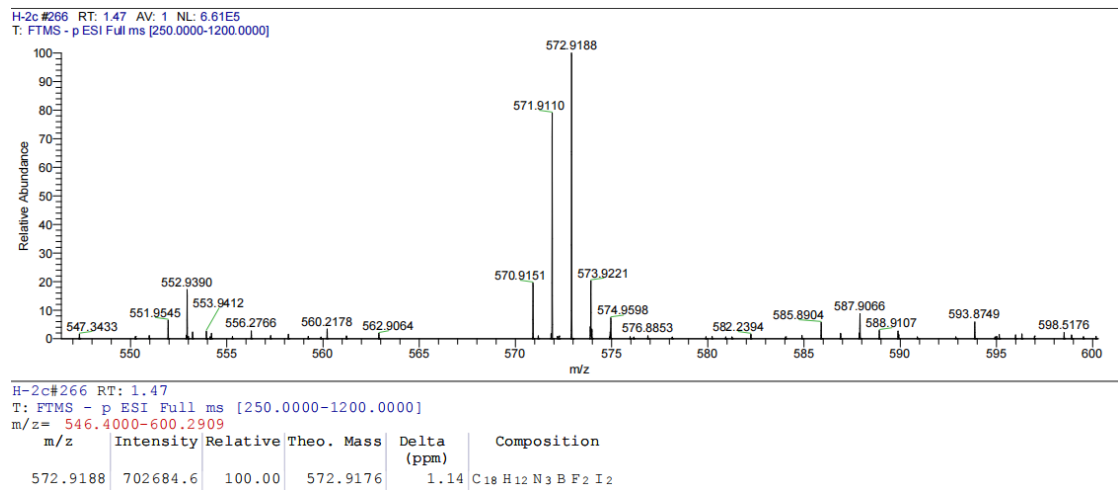

<sup>1</sup>H NMR spectrum of **3c** (CDCl<sub>3</sub>, 400 MHz)

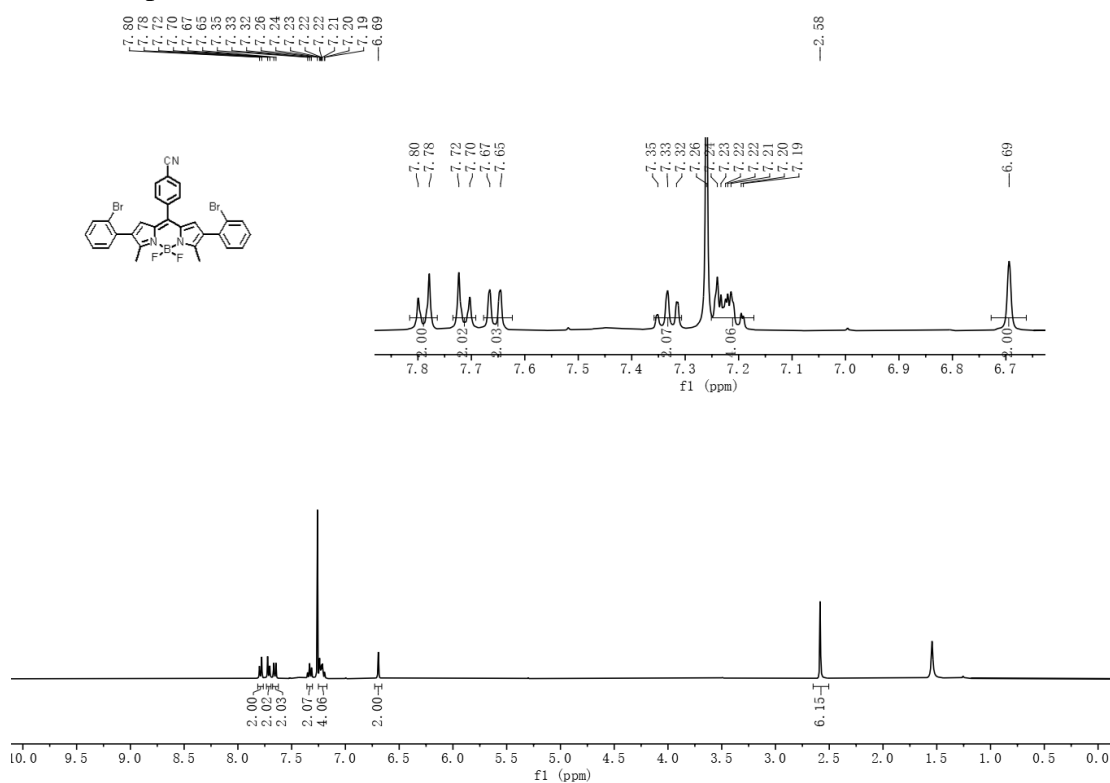

<sup>13</sup>C NMR Spectrum of **3c** (CDCl<sub>3</sub>, 101 MHz)

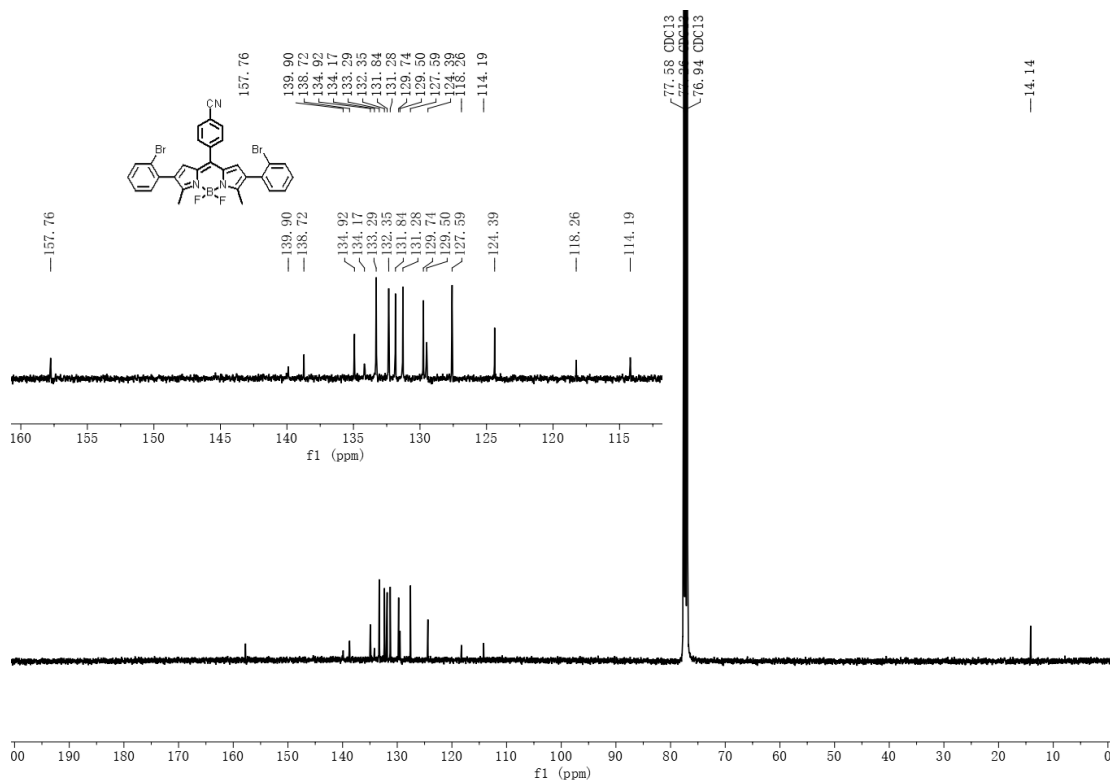

### DEPT Spectrum of **3c** (CDCl<sub>3</sub>, 101 MHz)

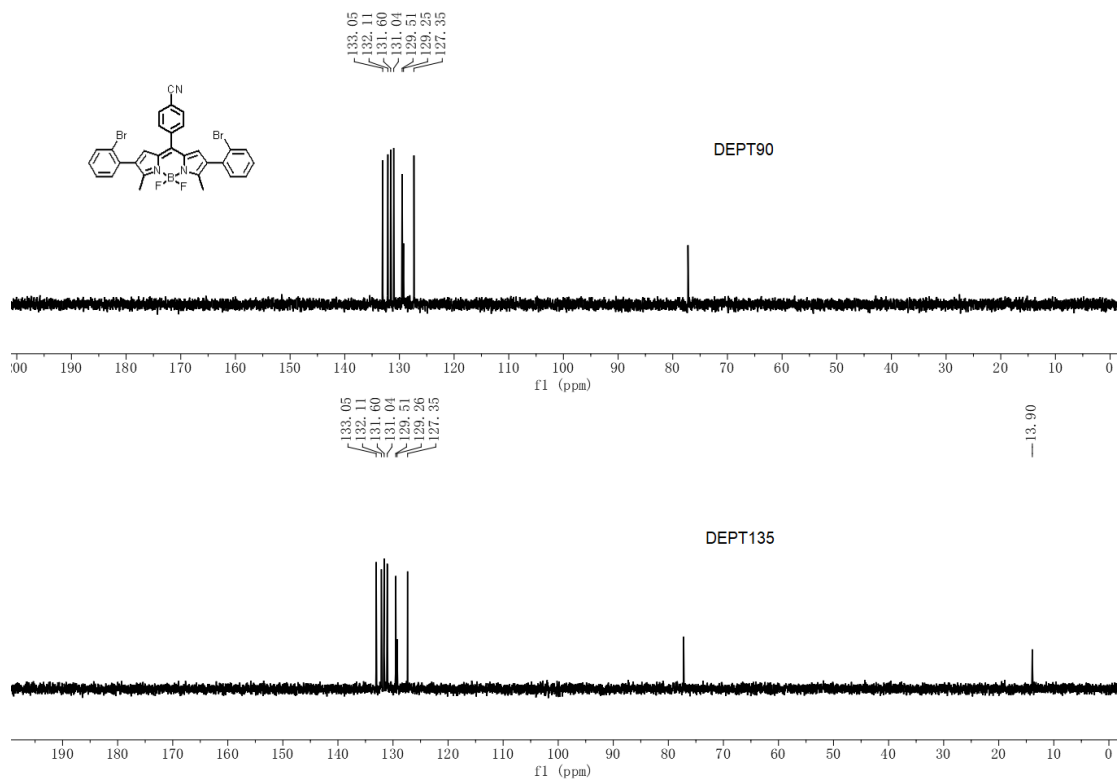

### HRMS Spectrum of **3c**

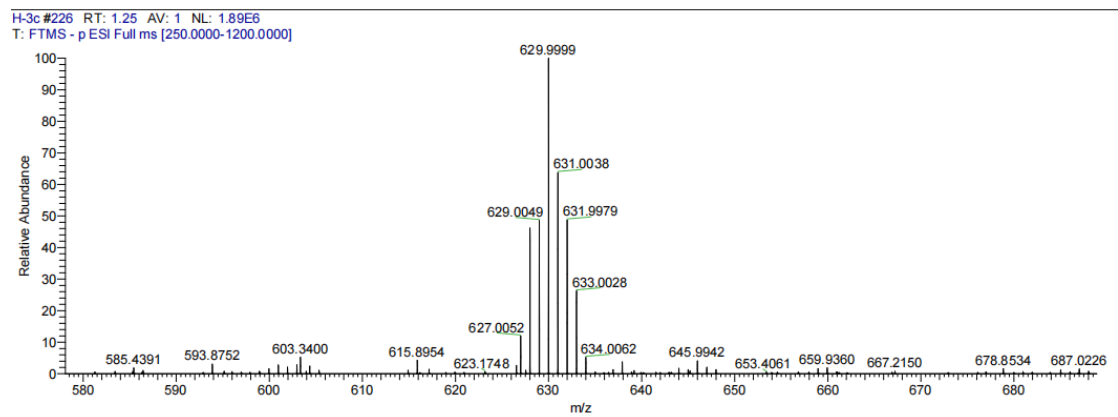

$^1\text{H}$  NMR spectrum of **4c** ( $\text{CDCl}_3$ , 400 MHz)

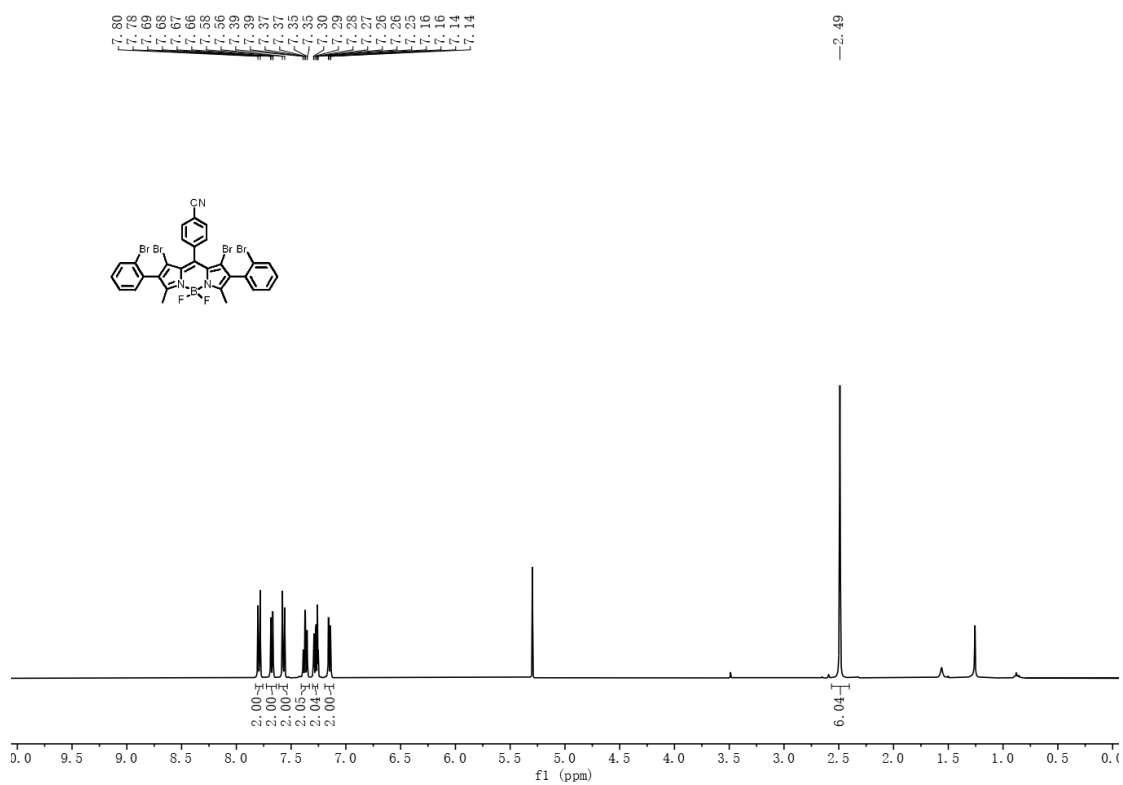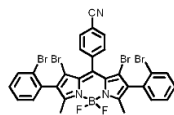

$^{13}\text{C}$  NMR Spectrum of **4c** ( $\text{CDCl}_3$ , 101 MHz)

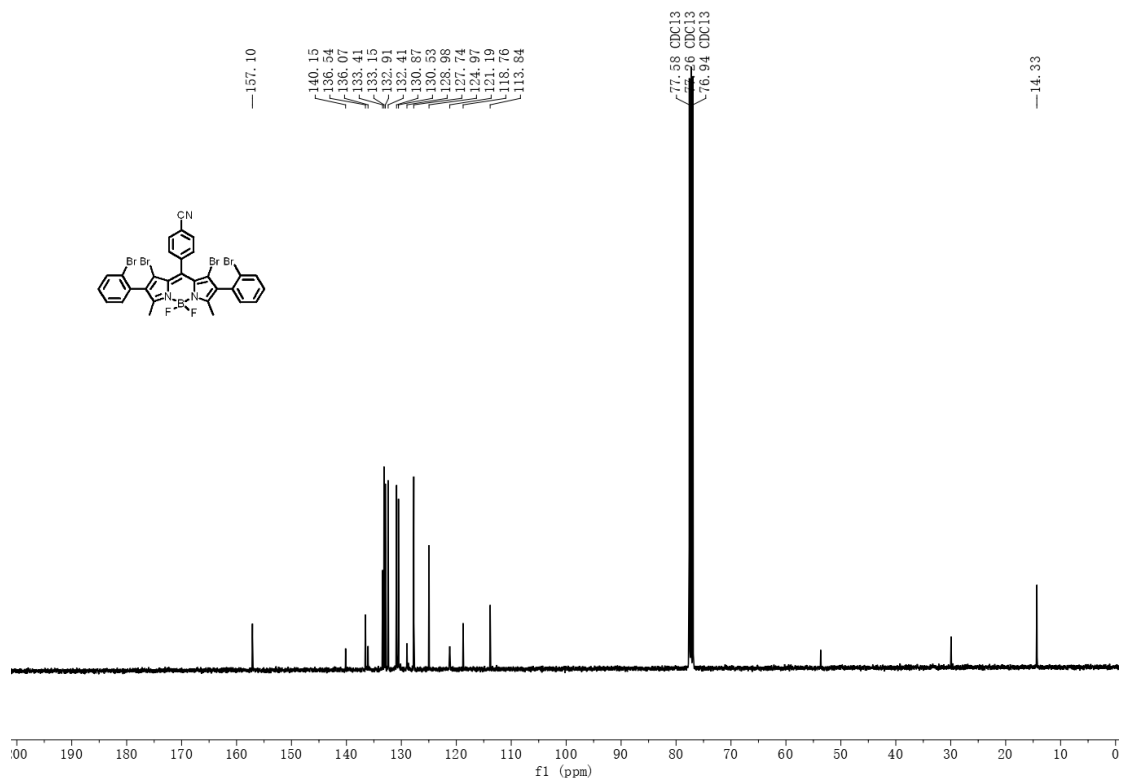

## DEPT Spectrum of **4c** (CDCl<sub>3</sub>, 101 MHz)

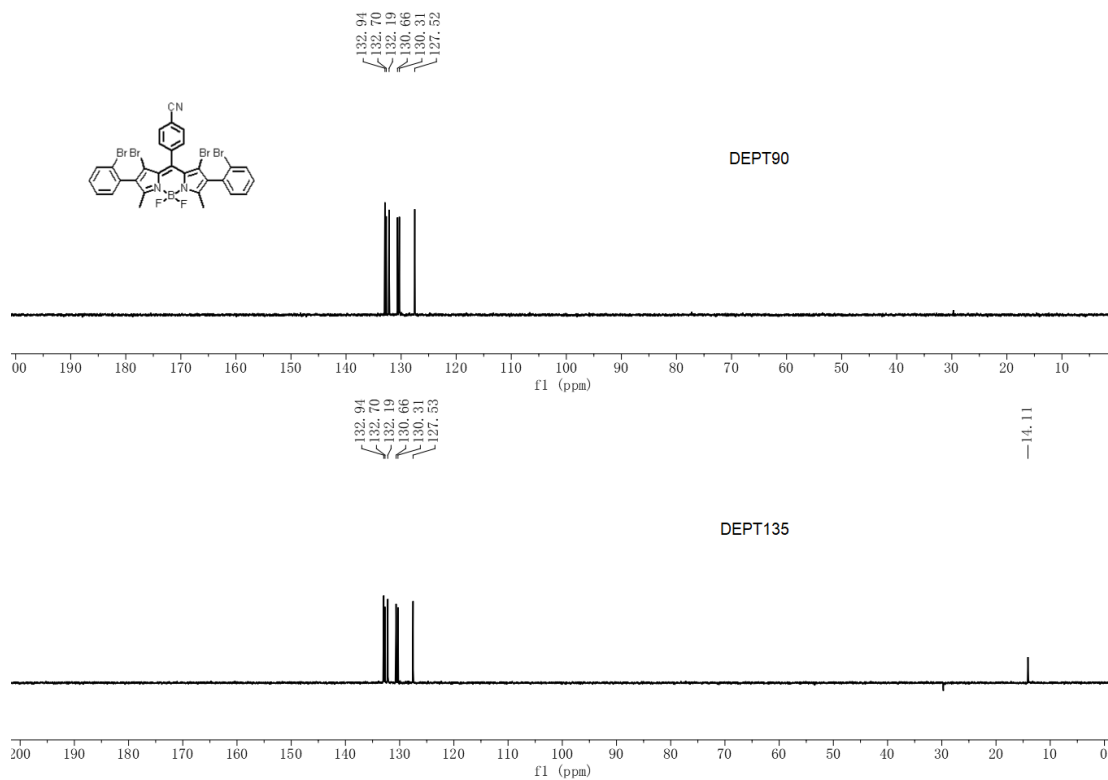

## HRMS Spectrum of **4c**

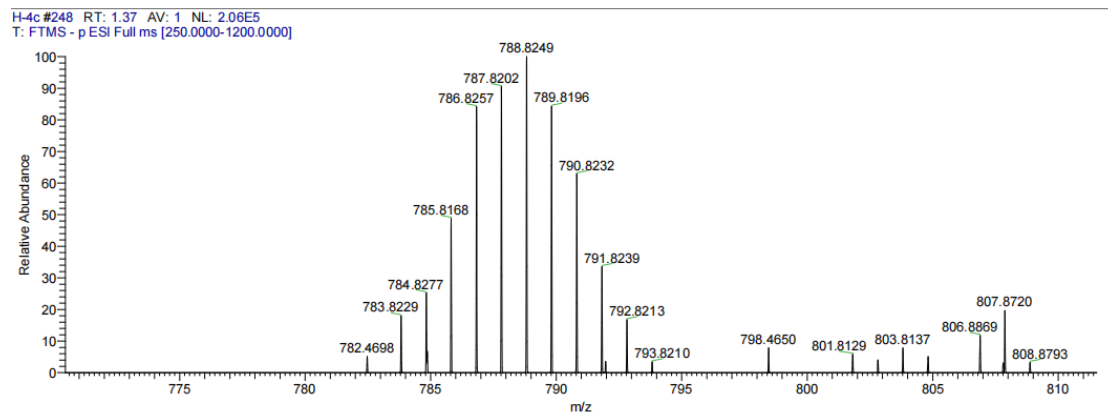



<sup>1</sup>H NMR spectrum of **5c** (CDCl<sub>3</sub>, 400 MHz)

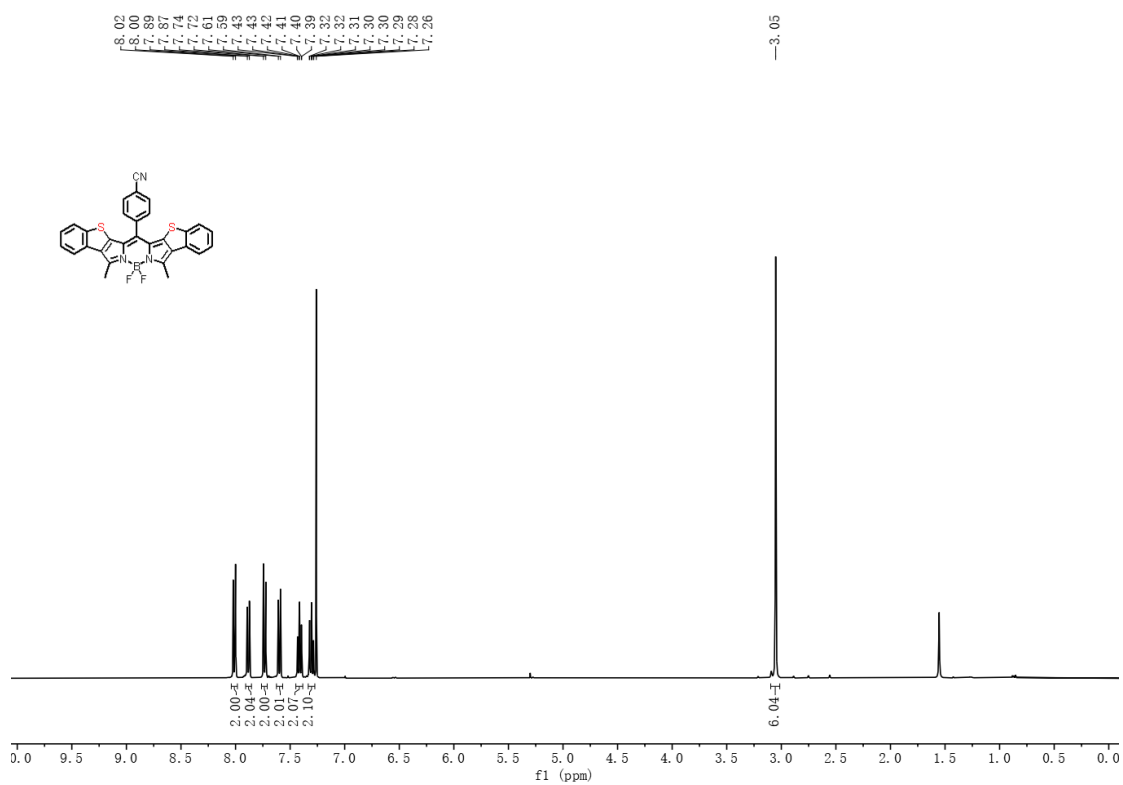

<sup>13</sup>C NMR Spectrum of **5c** (CDCl<sub>3</sub>, 101 MHz)

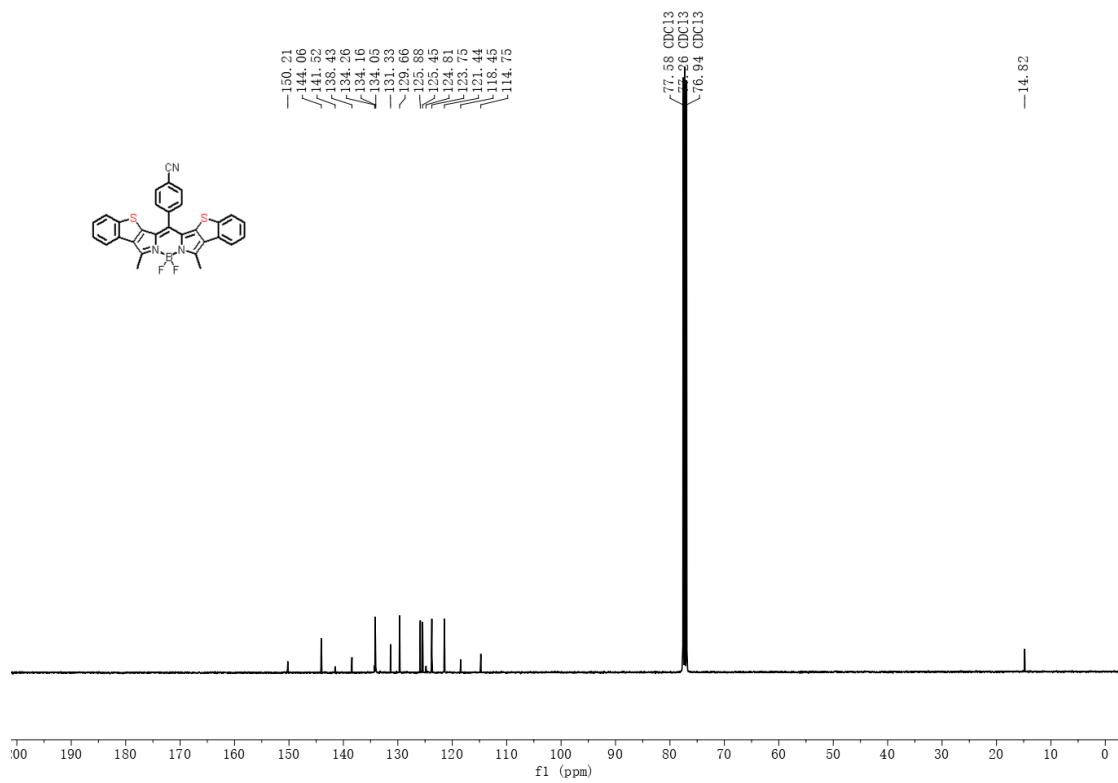

## DEPT Spectrum of **5c** (CDCl<sub>3</sub>, 101 MHz)

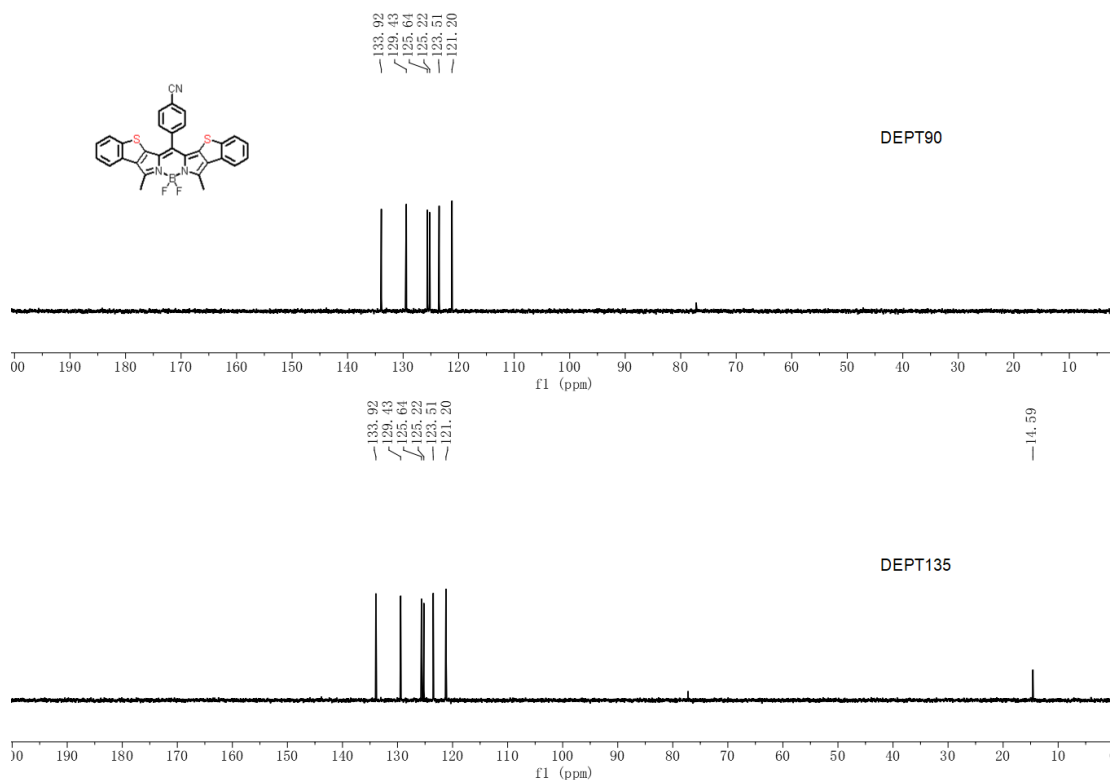

## HRMS Spectrum of **5c**

H-5c#235 RT: 1.30 AV: 1 NL: 4.90E6  
T: FTMS + p ESI Full ms [250.0000-1200.0000]

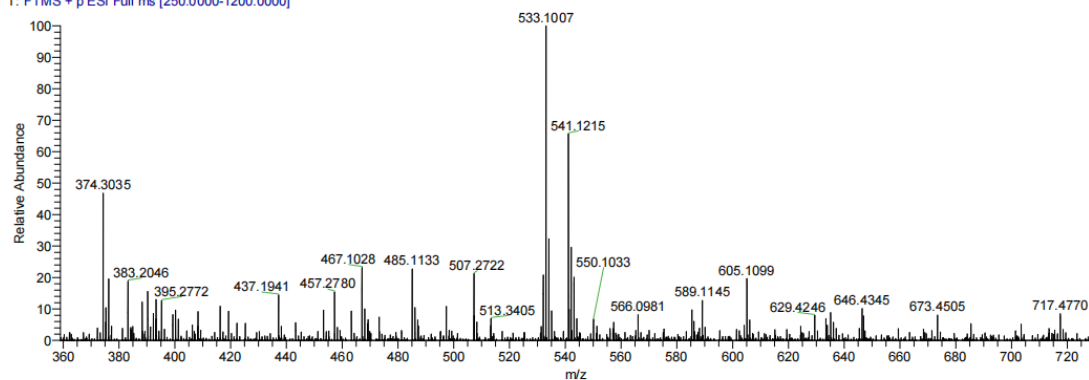

H-5c#235 RT: 1.30  
T: FTMS + p ESI Full ms [250.0000-1200.0000]

m/z = 358.9450-728.7353

| m/z      | Intensity | Relative | Theo. Mass | Delta (ppm) | Composition                                                                    |
|----------|-----------|----------|------------|-------------|--------------------------------------------------------------------------------|
| 533.1007 | 4912553.5 | 100.00   | 533.0998   | 0.93        | C <sub>30</sub> H <sub>18</sub> N <sub>3</sub> B F <sub>2</sub> S <sub>2</sub> |

<sup>1</sup>H NMR spectrum of **6c** (CDCl<sub>3</sub>, 400 MHz)

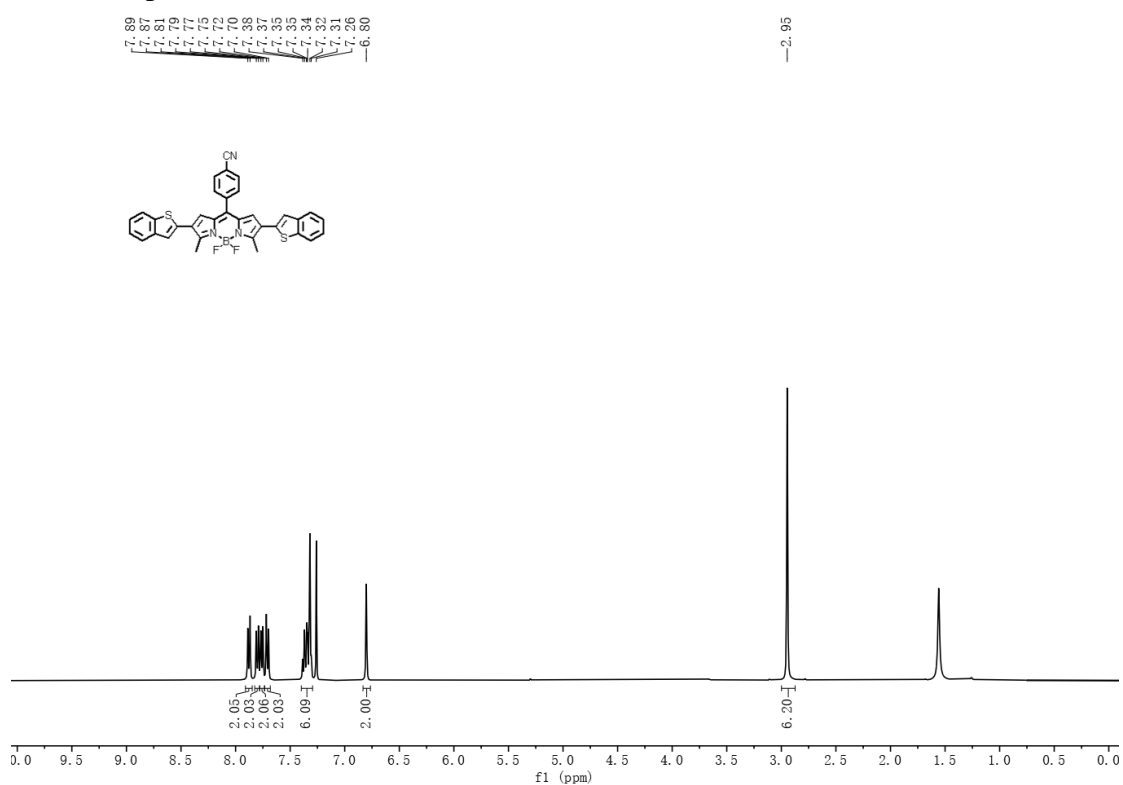

<sup>13</sup>C NMR Spectrum of **6c** (CDCl<sub>3</sub>, 101 MHz)

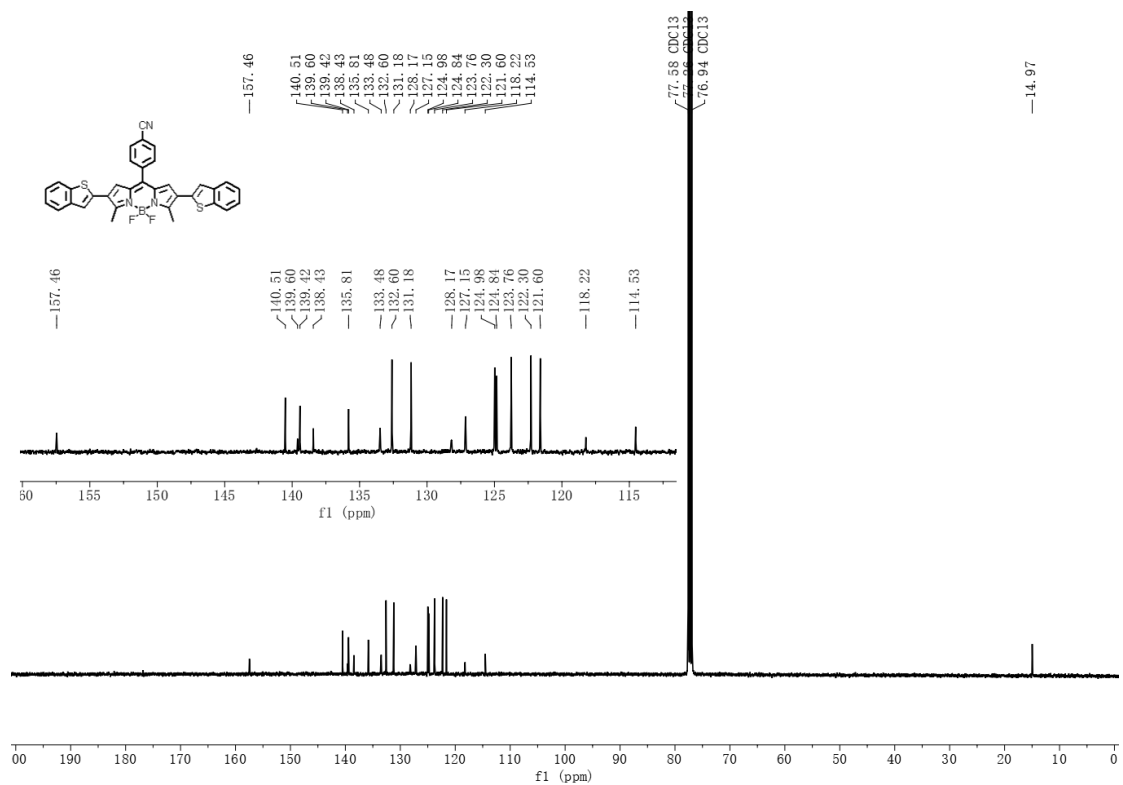

## DEPT Spectrum of **6c** (CDCl<sub>3</sub>, 101 MHz)

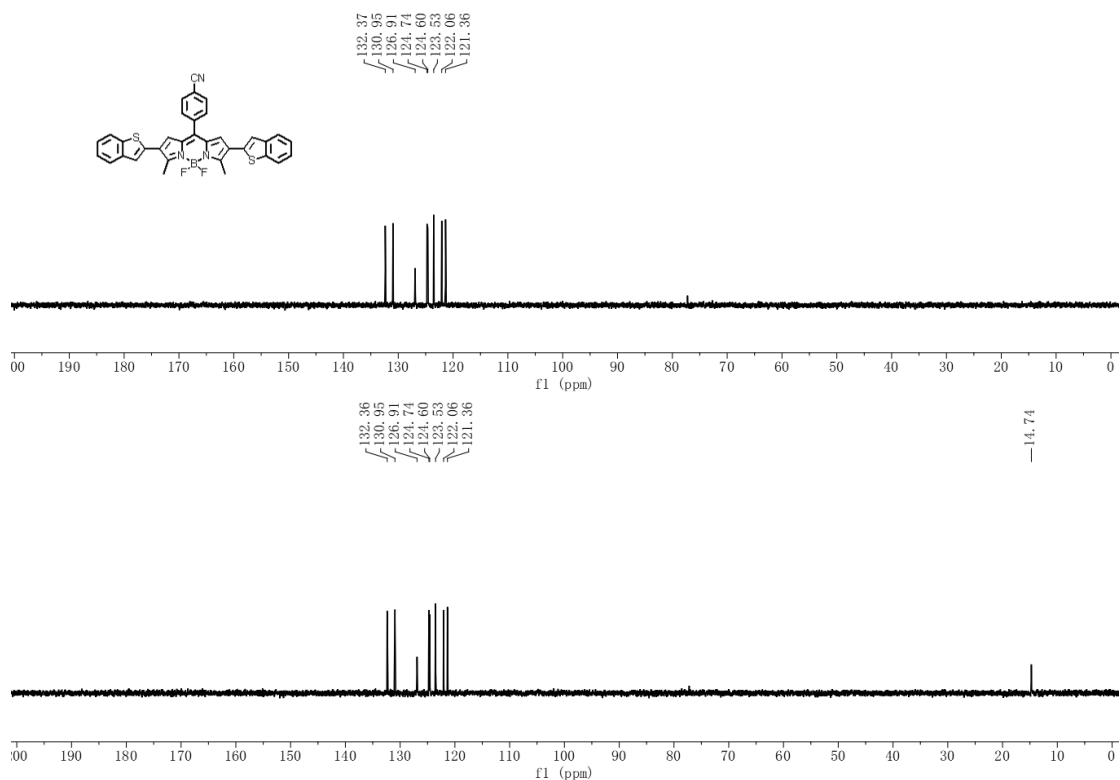

## HRMS Spectrum of **6c**

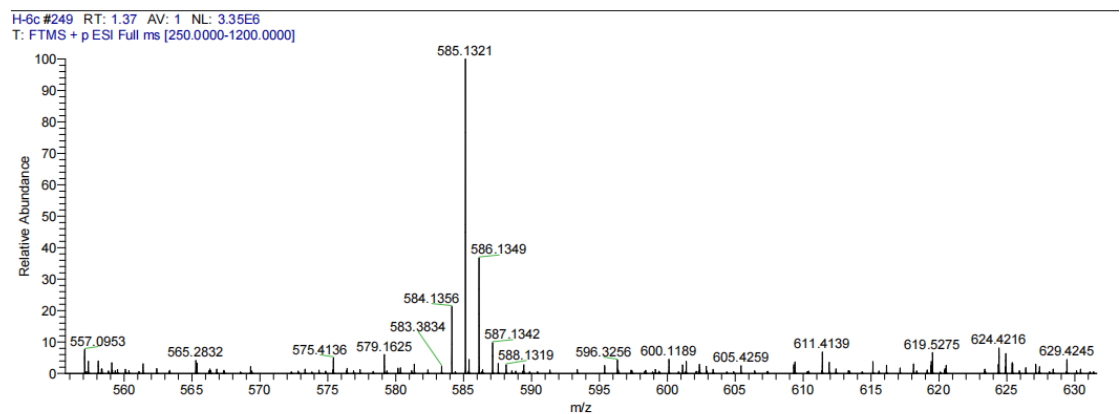

H-6c#249 RT: 1.37  
T: FTMS + p ESI Full ms [250.0000-1200.0000]  
m/z = 555.6684-631.6186

| m/z      | Intensity | Relative | Theo. Mass | Delta (ppm) | Composition                                                                    |
|----------|-----------|----------|------------|-------------|--------------------------------------------------------------------------------|
| 585.1321 | 3348374.8 | 100.00   | 585.1311   | 1.06        | C <sub>34</sub> H <sub>22</sub> N <sub>3</sub> B F <sub>2</sub> S <sub>2</sub> |

<sup>1</sup>H NMR spectrum of **7c** (CDCl<sub>3</sub>, 400 MHz)

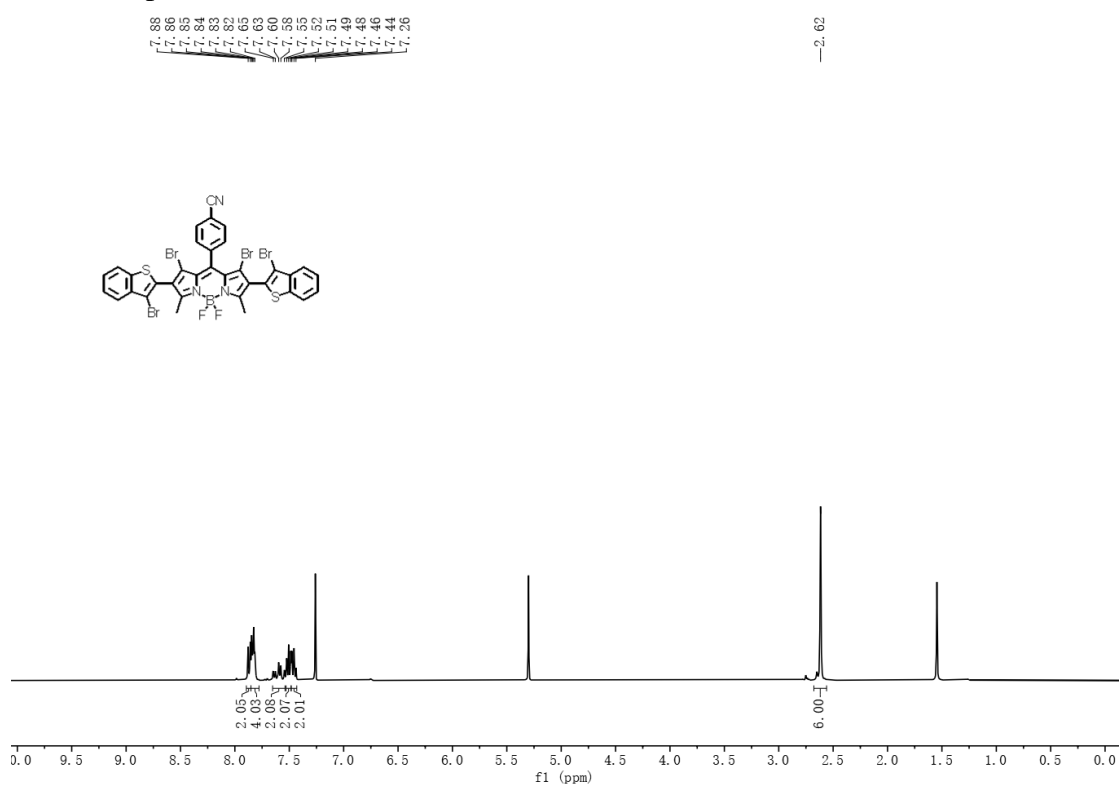

-2.62

<sup>13</sup>C NMR Spectrum of **7c** (CDCl<sub>3</sub>, 101 MHz)

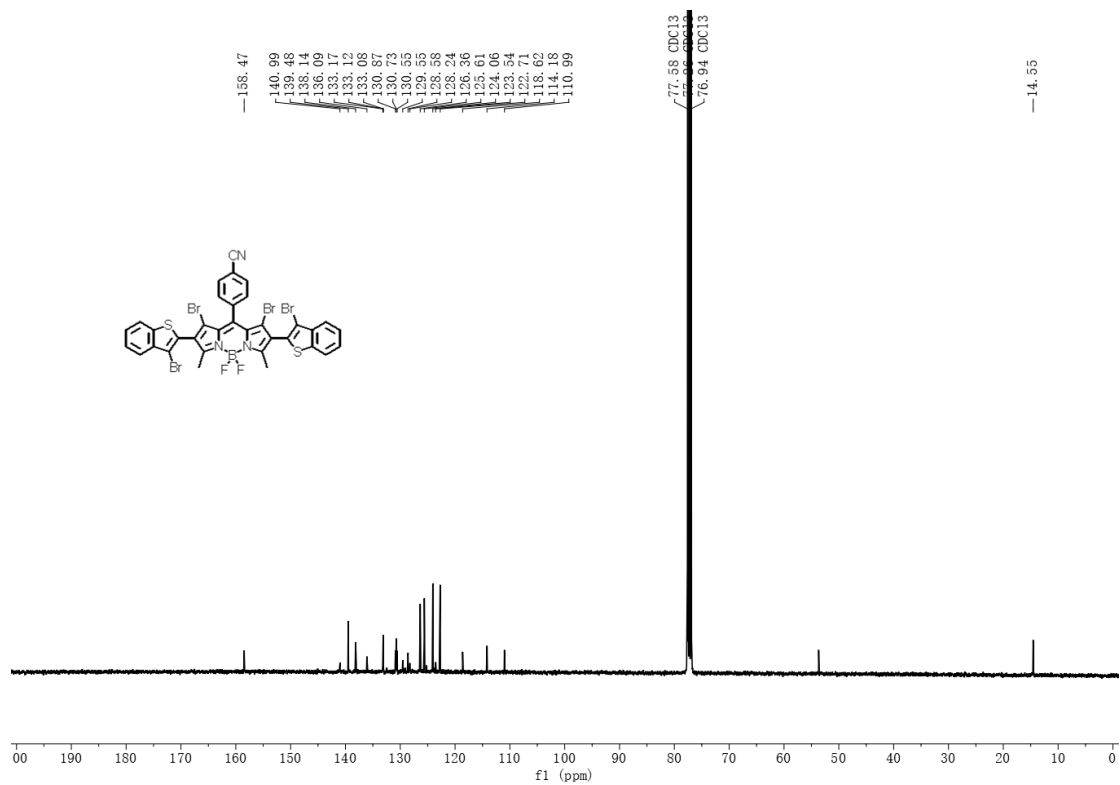

-14.55

## DEPT Spectrum of **7c** (CDCl<sub>3</sub>, 101 MHz)

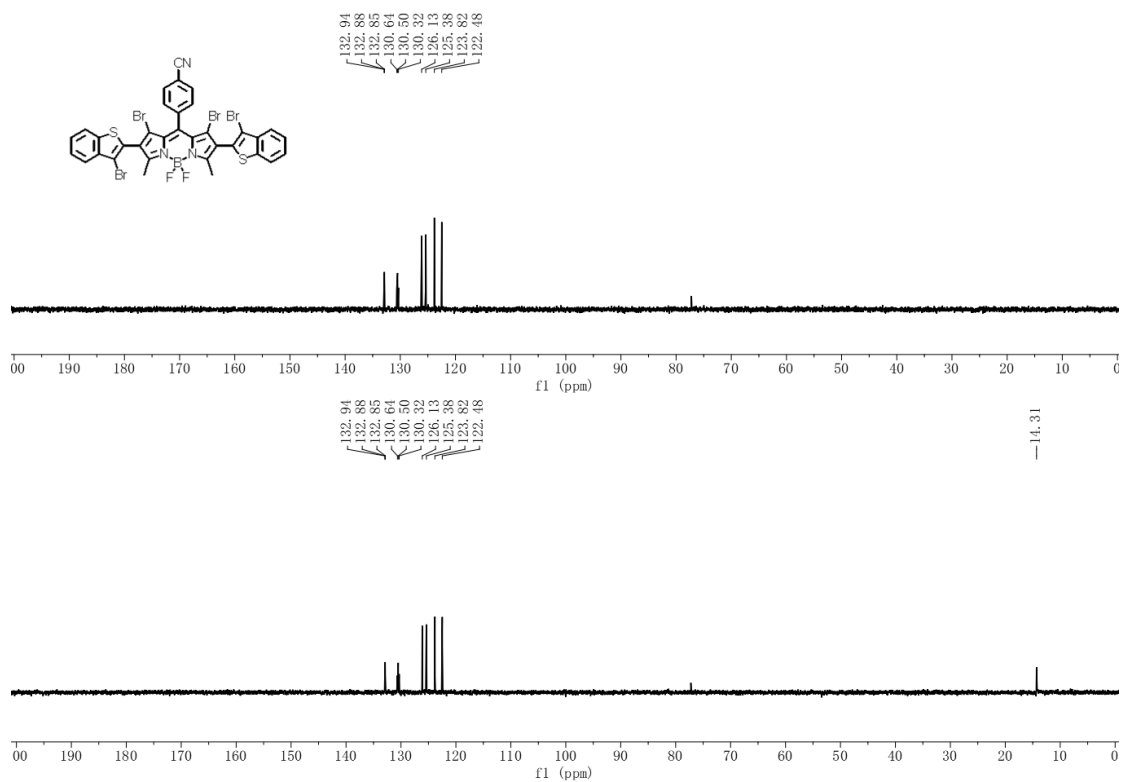

## HRMS Spectrum of **7c**

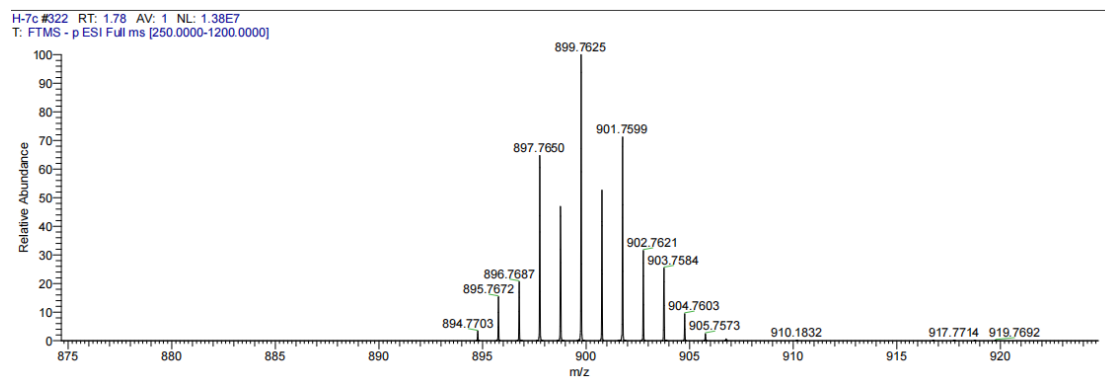

<sup>1</sup>H NMR spectrum of **8c** (CDCl<sub>3</sub>, 400 MHz)

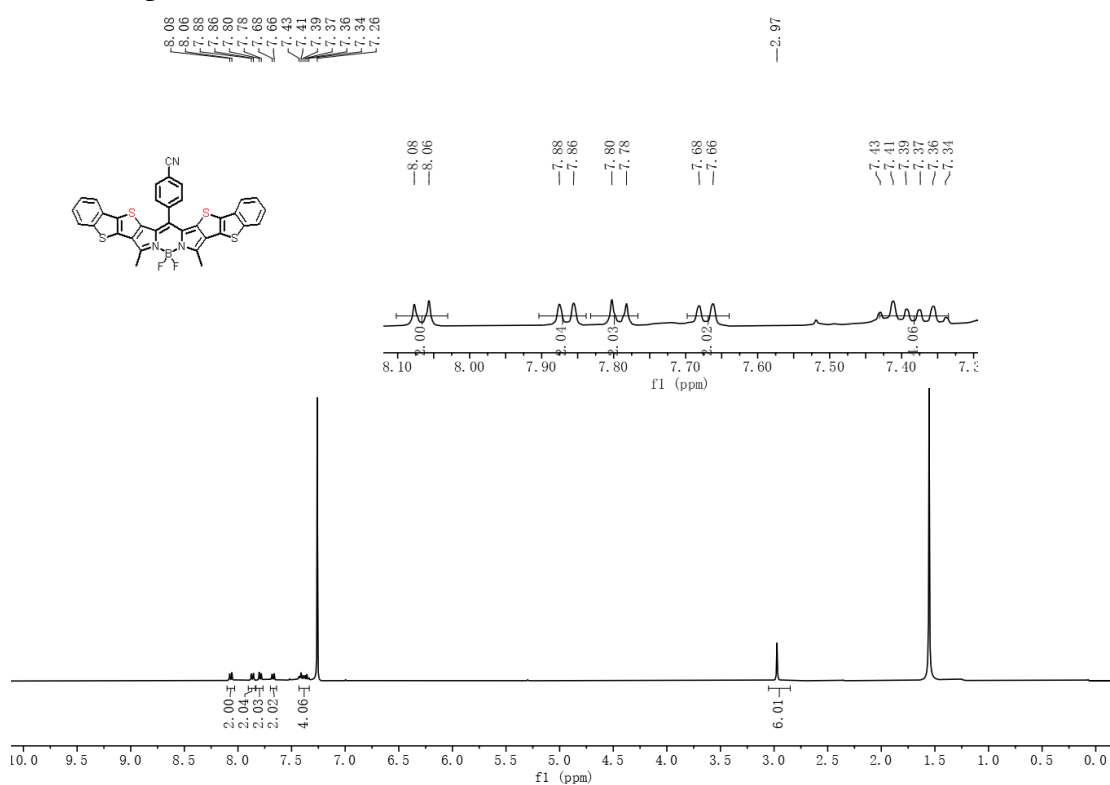

<sup>13</sup>C NMR Spectrum of **8c** (CDCl<sub>3</sub>, 101 MHz)

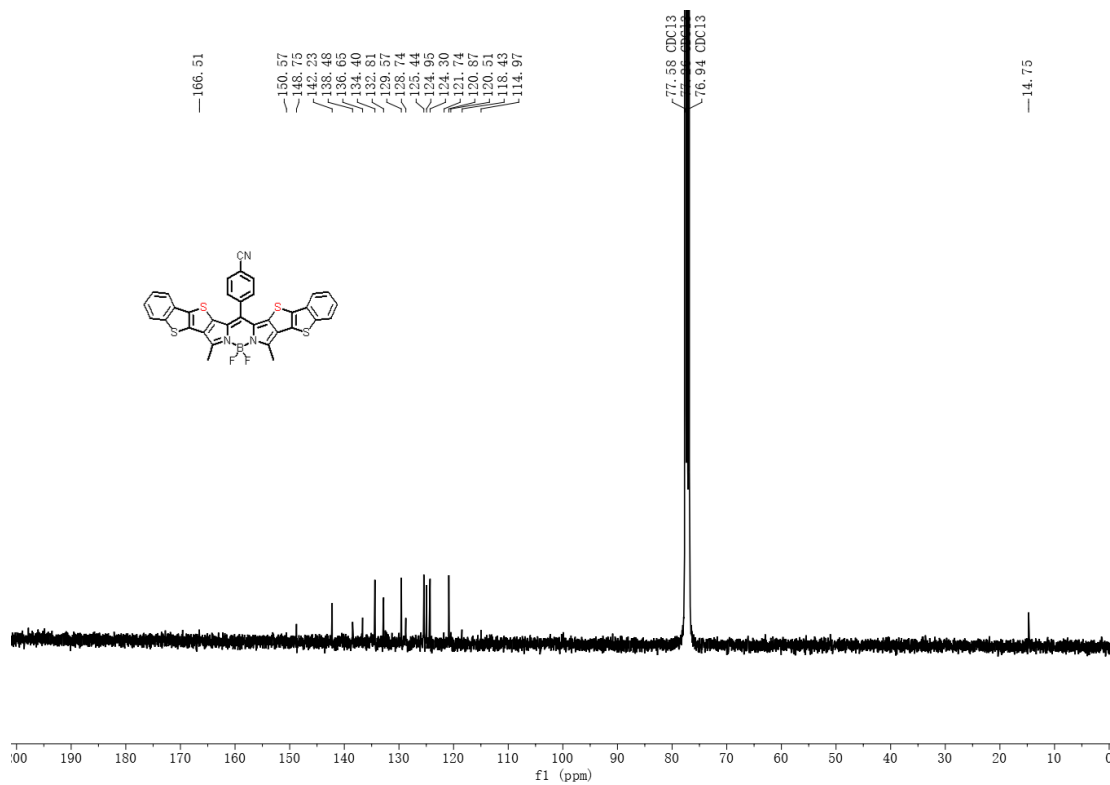

## DEPT Spectrum of **8c** (CDCl<sub>3</sub>, 101 MHz)

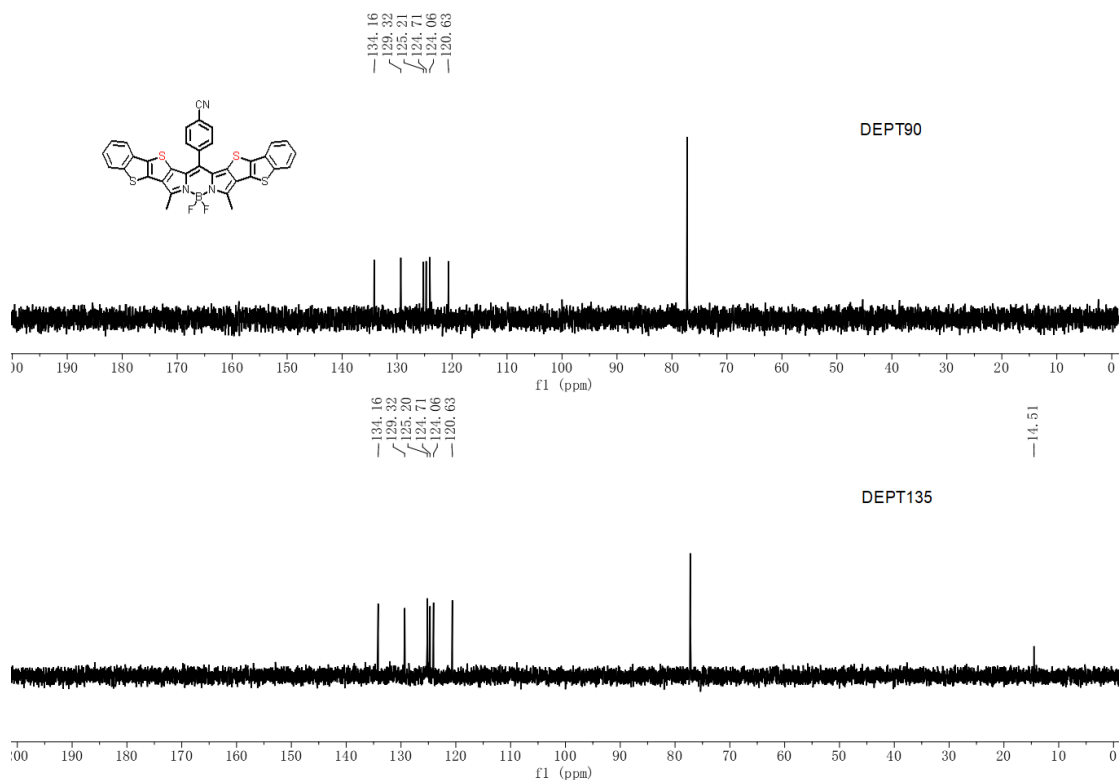

## HRMS Spectrum of **8c**

H-8c#400 RT: 2.22 AV: 1 NL: 1.74E6  
T: FTMS - p ESI Full ms [250.0000-1200.0000]

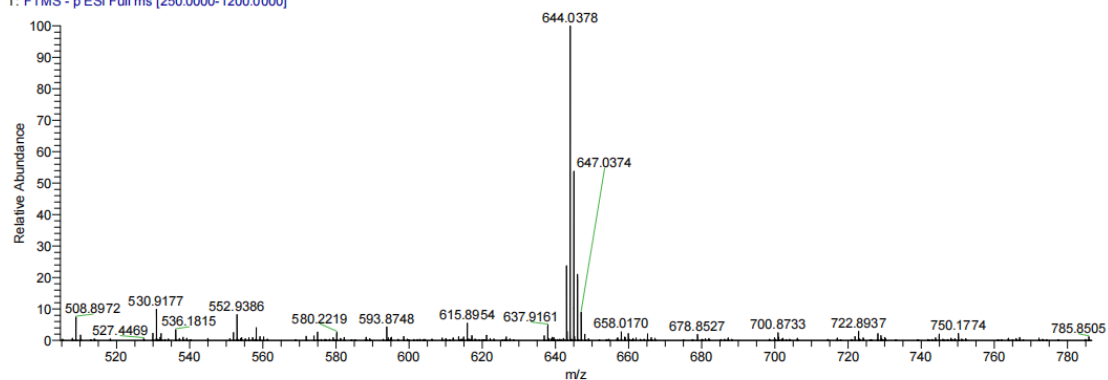

H-8c#400 RT: 2.22  
T: FTMS - p ESI Full ms [250.0000-1200.0000]

m/z = 504.6199-786.6317

| m/z      | Intensity | Relative | Theo. Mass | Delta (ppm) | Composition                                                                    |
|----------|-----------|----------|------------|-------------|--------------------------------------------------------------------------------|
| 644.0378 | 1803166.0 | 100.00   | 644.0361   | 1.75        | C <sub>34</sub> H <sub>17</sub> N <sub>3</sub> B F <sub>2</sub> S <sub>4</sub> |



## 8. References

- [1] Sun, Q.; Wang, H.; Yang, C.; Li, Y. Synthesis and electroluminescence of novel copolymers containing crown ether spacers. *J. Mater. Chem.* **2003**, *13*, 800.
- [2] Cai, K.; Xie, J.; Zhao, D. NIR J-aggregates of hydroazaheptacene tetraimides. *J. Am. Chem. Soc.*, **2014**, *136*, 28.
- [3] Dolomanov, O. V.; Bourhis, L. J.; Gildea, R. J.; Howard, J. A. K.; Puschmann, H. Olex2: A complete structure solution, refinement and analysis program, *J. Appl. Cryst.* **2009**, *42*, 339.
- [4] Bourhis, L. J.; Dolomanov, O. V.; Gildea, R. J.; Howard, J. A. K.; Puschmann, H. The anatomy of a comprehensive constrained, restrained refinement program for the modern computing environment-Olex2 dissected. *Acta Cryst.* **2015**, *A71*, 59.
- [5] Sheldrick, G. M. Crystal structure refinement with ShelXL, *Acta Cryst.* **2015**, *C71*, 3.
- [6] Yanai H.; Hoshikawa S.; Moriiwa Y.; Shoji A.; Yanagida, A.; Matsumoto T. A fluorinated carbanionic substituent for improving water solubility and lipophilicity of fluorescent dyes. *Angew. Chem. Int. Ed.* **2021**, *60*, 5168.
- [7] Miller L.; Impelmann A.; Bauer F.; Breit B. Carbonylation as a key step in new tandem reactions-a route to BODIPYs. *Chem. Eur. J.* **2024**, *30*, e202303752.
- [8] Tao J.; Perdew J. P.; Staroverov V. N.; Scuseria G. E. Climbing the density functional ladder: nonempirical meta-generalized gradient approximation designed for molecules and solids. *Phys. Rev. Lett.* **2003**, *91*, 146401.
- [9] Staroverov V. N.; Scuseria G. E.; Tao J.; Perdew J. P. Comparative assessment of a new nonempirical density functional: Molecules and hydrogen-bonded complexes. *J. Chem. Phys.* **2003**, *119*, 12129.
- [10] Cancès E.; Mennucci B.; Tomasi J. A new integral equation formalism for the polarizable continuum model: Theoretical background and applications to isotropic and anisotropic dielectrics. *J. Chem. Phys.* **1997**, *107*, 3032.
- [11] Mennucci B.; Cancès E.; Tomasi J. Evaluation of solvent effects in isotropic and anisotropic dielectrics and in ionic solutions with a unified integral equation method: theoretical bases, computational implementation, and numerical applications. *J. Phys. Chem. B* **1997**, *101*, 10506.
- [12] Frisch M. J.; Trucks G. W.; Schlegel H. B.; et al. *Gaussian 16 Rev. A.03*; Wallingford, CT; Gaussian, Inc; 2016.
- [13] Liu Z, Lu T, Chen Q. An sp-hybridized all-carboatomic ring, cyclo[18]carbon: Electronic

structure, electronic spectrum, and optical nonlinearity [J]. *Carbon*, **2020**, 165, 461.

[14] Zhang J.; Lu T. Efficient evaluation of electrostatic potential with computerized optimized code. *Phys. Chem. Chem. Phys.* **2021**, 23, 20323.

[15] Lu T.; Chen F. Multiwfn: a multifunctional wavefunction analyzer. *J. Comput. Chem.* **2012**, 33, 580.

[16] Humphrey W.; Dalke A.; Schulten K. VMD: visual molecular dynamics. *J. Mol. Graph.* **1996**, 14, 33.
